# Supplementary material for: A perfect double role of CF3 groups in activating substrates and stabilizing adducts: the chiral Brønsted acid-catalyzed direct arylation of trifluoromethyl ketones
Source: Royal Society of Chemistry journal article supplement (doi:10.1039/b900474b), 2009-01-01
Supplement: b900474b.pdf [file b900474b.pdf]

# Electronic Supporting Information

## Perfectly Double Roles of CF<sub>3</sub> Group in Activating Substrates and Stabilizing Adducts: Chiral Brønsted Acid-Catalyzed Direct Arylation of Simple Trifluoromethyl Ketones

Jing Nie,<sup>a</sup> Guang-Wu Zhang,<sup>a</sup> Lian Wang,<sup>a</sup> Aiping Fu,<sup>c</sup> Yan Zheng,<sup>a</sup> Jun-  
An Ma<sup>\* a, b</sup>

<sup>a</sup> Department of Chemistry, Tianjin University, Tianjin 300072, China. <sup>b</sup> State Key Laboratory of Elemento-Organic Chemistry, Tianjin 300071, China. <sup>c</sup> Instituted for Computational Science and Engineering, Qingdao University, Shandong, Qingdao 266071, China

## General information

NMR were recorded on Varian Mercury Plus 500 and 400 instruments at 500 MHz or 400 MHz ( $^1\text{H}$  NMR), 125 MHz ( $^{13}\text{C}$  NMR), as well as 376 MHz ( $^{19}\text{F}$  NMR). Chemical shifts were reported in ppm down field from internal  $\text{Me}_4\text{Si}$  and external  $\text{CF}_3\text{COOH}$ , respectively. MS were recorded on a VG-7070E or HP 5988A spectrometer using the EI method. HPLC analyses were carried out on a Hewlett Packard Model HP 1200 instrument.

## Experimental section

Unless otherwise noted, all commercially available compounds and solvents were used as provided without further purification. All trifluoroacetophenone substrates were prepared by previous method.<sup>1</sup> The chiral phosphoric acids<sup>2</sup> and N-triflyl phosphoramides<sup>3</sup> were synthesized according to the literatures.

## Theoretical study

Calculations were performed using the Gaussian 03 Program.<sup>4</sup> Geometries were optimized by the B3LYP<sup>5</sup> method with the 6-31G\*\* basis set. Population analyses were performed by the natural bond orbital method at the same level.

**Figure SI. The 3D structures of acetophenone and trifluoroacetophenone. Bond lengths are in Å and NPA charges are also listed with underline and in italic type.**

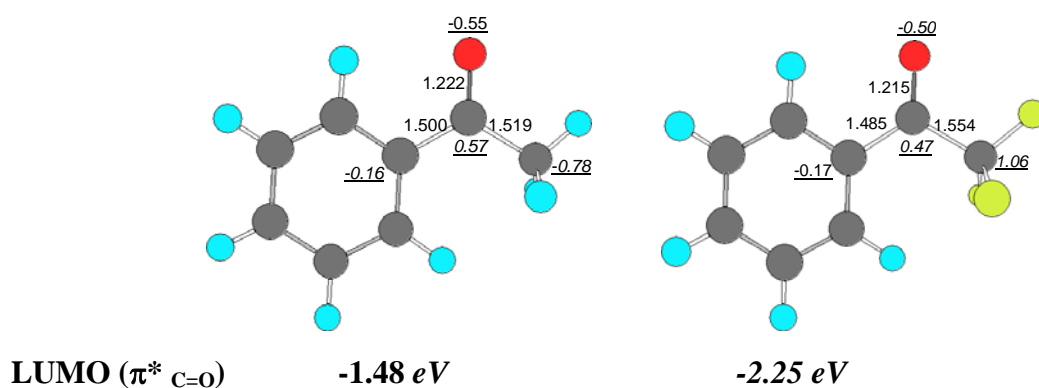

**Note:** Figure SI shows the significant changes of the carbonyl functionality resulting

from the F-substitute: (i) the C1-O bond length decreases (ii) the charges on the carbon and oxygen atoms in the carbonyl group are changed from 0.57 ( C ) and -0.55 ( O ), to 0.47 ( C ) and -0.55 ( O ), respectively. (iii) the energy of the LUMO ( $\pi^*_{C=O}$ ) is lowered from -1.48 eV to -2.25 eV, which might indicate that trifluoroacetophenone can be more reactive than acetophenone.

### **Brønsted Acid-catalyzed diarylation of acetophenone:**

To a flame-dried reaction tube was added indole (30.4 mg, 0.26 mmol), acetophenone (37.0 mg, 0.31 mmol), chiral phosphoric acid (9.7 mg, 0.013 mmol), and solvent ( $\text{CH}_2\text{Cl}_2$ , 0.3 mL). After the solution was stirred for 168 h at room temperature (25 °C), the crude product was purified directly by flash column chromatography with ethyl acetate/petroleum ether (1:10 to 1:5) to afford the bisindole product (42.3 mg, 96.8% yield). (Notes: no any product was observed at 0 °C for 168 h).

### **Brønsted Acid-catalyzed arylation of 1-(1H-indole-3-yl)-1-phenylethanol:**

To a flame-dried reaction tube was added indole (20.0 mg, 0.17 mmol), 1-(1H-indole-3-yl)-1-phenylethanol <sup>6</sup> (40.3 mg, 0.17 mmol), chiral phosphoric acid **1** or N-triflyl phosphoramidate (0.0085 mmol), and solvent ( $\text{CH}_2\text{Cl}_2$ , 0.3mL). After the solution was stirred for 10 min, the reaction was complete. The crude product was purified directly by flash column chromatography with ethyl acetate/petroleum ether (1:10 to 1:5) to afford the bisindole product in quantitative yield (57.1 mg).

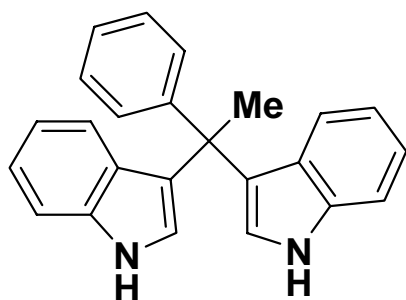

3-(1-(1H-indole-3-yl)-1-phenylethyl)-1H-indole

mp: 82-84 °C; <sup>1</sup>H NMR (500 MHz,  $\text{CDCl}_3$ )  $\delta$  [ppm] 7.90 (br, 2H), 7.41 (d,  $J = 7.5$  Hz,

2H), 7.34 (dd,  $J = 8.0, 5.5$  Hz, 4H), 7.26 (t,  $J = 7.5$  Hz, 2H), 7.20 (t,  $J = 7.0$  Hz, 1H), 7.14 (t,  $J = 7.5$  Hz, 2H), 6.94 (t,  $J = 7.5$  Hz, 2H), 6.65 (d,  $J = 2.5$  Hz, 2H), 2.38 (s, 3H);  $^{13}\text{C}$  NMR (125 MHz,  $\text{CDCl}_3$ )  $\delta$  [ppm] 148.3, 137.3, 128.3, 128.0, 126.7, 126.1, 124.9, 123.6, 122.3, 121.7, 119.1, 111.4, 44.0, 29.0; IR (KBr)  $\nu$  ( $\text{cm}^{-1}$ ) 3412, 3053, 2918, 2849, 1597, 1456, 1415, 1338, 1245, 1100, 1011, 909, 741, 701  $\text{cm}^{-1}$ ; MS (ESI)  $m/z$  335.6  $[\text{M}-\text{H}]^-$  (100%).

## Screening of catalysts for the model reaction

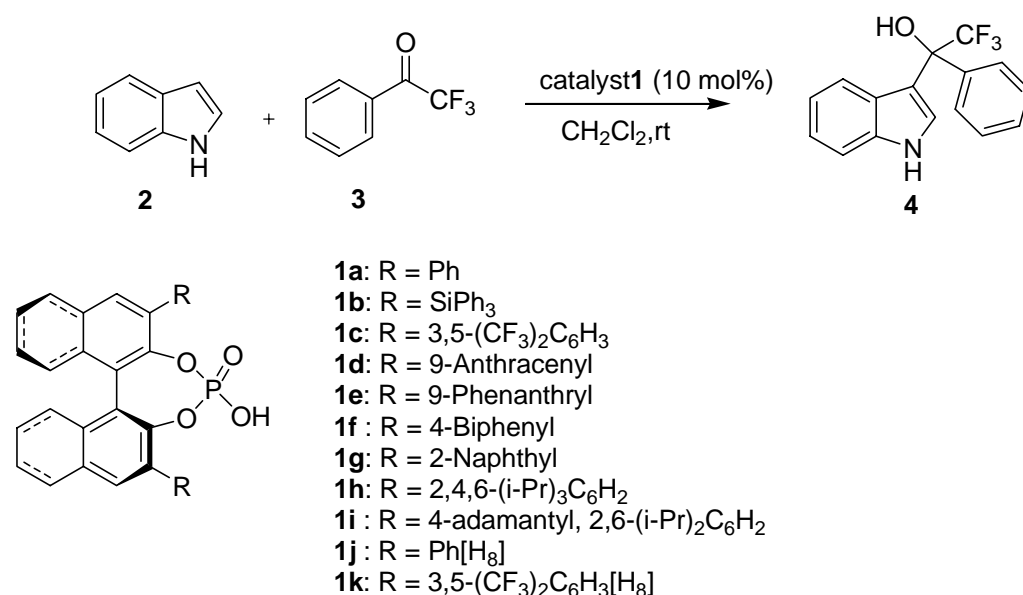

| Entry <sup>[a]</sup> | Catalyst  | Time (h) | Yield [%] <sup>[b]</sup> | ee [%] <sup>[c]</sup> |
|----------------------|-----------|----------|--------------------------|-----------------------|
| 1                    | <b>1a</b> | 240      | 19                       | 33                    |
| 2                    | <b>1b</b> | 240      | 19                       | 15                    |
| 3                    | <b>1c</b> | 240      | 19                       | 9                     |
| 4                    | <b>1d</b> | 144      | 41                       | 46                    |
| 5                    | <b>1e</b> | 144      | 37                       | 36                    |
| 6                    | <b>1f</b> | 144      | 40                       | 26                    |
| 7                    | <b>1g</b> | 144      | 48                       | 28                    |
| 8                    | <b>1h</b> | 48       | 99                       | 92                    |
| 9                    | <b>1i</b> | 96       | 86                       | 83                    |
| 10                   | <b>1j</b> | 240      | 29                       | 27                    |
| 11                   | <b>1k</b> | 240      | 16                       | 12                    |

<sup>a</sup> The reaction employed a molar ratio of **2:3 = 1:1.2** (equiv), with a concentration of **2** being 0.56 M. <sup>b</sup> Isolated yield. <sup>c</sup> Enantiometric excess was determined by chiral HPLC analysis

## General Procedure for the Catalytic Asymmetric Arylation

### Reaction of Indoles with Trifluoromethyl ketones

To a flame-dried reaction tube was added indole (0.17 mmol), trifluoroacetophenone (0.21 mmol), chiral phosphoric acid **1** (0.0085 mmol), and solvent ( $\text{CH}_2\text{Cl}_2$ , 0.3 mL). After the solution was stirred for the stated time, the crude product was purified directly by flash column chromatography with ethyl acetate/petroleum ether (1:10 to 1:5) to afford the desired product.

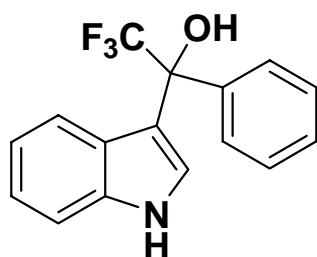

#### 2,2,2-trifluoro-1-(1H-indole-3-yl)-1-phenylethanol

> 99% yield, mp: 82-84 °C;  $[\alpha]_{\text{D}}^{20} = +78.2$  (c 1.0,  $\text{CH}_2\text{Cl}_2$ ); 92% ee, [Daicel Chiralcel OD-H, Hexane/*i*-PrOH = 80/20, 0.8 mL/min, 254 nm; t (major) = 8.149 min, t (minor) = 10.826 min];  $^{19}\text{F}$  NMR (376 MHz,  $\text{CDCl}_3$ )  $\delta$  [ppm] -77.1 (s, 3F);  $^1\text{H}$  NMR (500 MHz,  $\text{CDCl}_3$ )  $\delta$  [ppm] 8.26 (br, 1H), 7.61-7.59 (m, 2H), 7.49-7.48 (m, 1H), 7.39 (d,  $J = 8.0$  Hz, 1H), 7.37-7.34 (m, 3H), 7.20-7.15 (m, 2H), 6.97-6.94 (m, 1H), 2.86 (s, 1H);  $^{13}\text{C}$  NMR (125 MHz,  $\text{CDCl}_3$ )  $\delta$  [ppm] 137.9, 136.5, 128.8, 128.2, 127.9 (d,  $^3J_{\text{C-F}} = 0.9$  Hz), 125.6 (q,  $^1J_{\text{C-F}} = 284.6$  Hz), 125.4, 123.5 (q,  $^3J_{\text{C-F}} = 3.0$  Hz), 123.0, 121.2, 120.5, 114.3, 111.5, 77.3 (q,  $^2J_{\text{C-F}} = 29.5$  Hz); IR (KBr)  $\nu$  ( $\text{cm}^{-1}$ ) 3535, 3503, 3402, 1544, 1461, 1449, 1273, 1164, 1042, 937, 752  $\text{cm}^{-1}$ ; MS (ESI)  $m/z$  290.05  $[\text{M-H}]^-$  (100%).

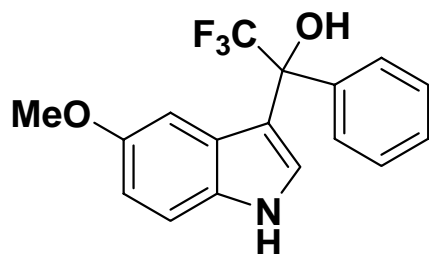

#### 2,2,2-trifluoro-1-(5-methoxy-1H-indole-3-yl)-1-phenylethanol

> 99% yield, mp: 120-121 °C;  $[\alpha]_{\text{D}}^{20} = +14.5$  (c 1.0,  $\text{CH}_2\text{Cl}_2$ ); 92% ee, [Daicel Chiralcel OD-H, Hexane/*i*-PrOH = 80/20, 0.8 mL/min, 254 nm; t (major) = 8.990 min,

t (minor) = 10.963 min];  $^{19}\text{F}$  NMR (376 MHz,  $\text{CDCl}_3$ )  $\delta$  [ppm] -77.2 (s, 3F);  $^1\text{H}$  NMR (500MHz,  $\text{CDCl}_3$ )  $\delta$  [ppm] 8.16 (br, 1H), 7.61-7.59 (m, 2H), 7.45-7.44 (m, 1H), 7.36-7.34 (m, 3H), 7.26 (d,  $J = 9.0$  Hz, 1H), 6.82 (dd,  $J = 6.5, 2.5$  Hz, 1H), 6.52 (d,  $J = 2.5$  Hz, 1H), 3.57 (s, 3H), 2.84 (s, 1H);  $^{13}\text{C}$  NMR (125 MHz,  $\text{CDCl}_3$ )  $\delta$  [ppm] 154.2, 137.9, 131.5, 128.7, 128.2, 127.9 (d,  $^3J_{\text{C-F}} = 0.9$  Hz), 126.0, 125.6 (q,  $^1J_{\text{C-F}} = 284.6$  Hz), 124.0 (q,  $^3J_{\text{C-F}} = 2.9$  Hz), 114.0, 113.3, 112.1, 102.7, 77.2 (q,  $^2J_{\text{C-F}} = 28.3$  Hz), 55.8; IR (KBr)  $\nu$  ( $\text{cm}^{-1}$ ) 3429, 2962, 1589, 1488, 1455, 1299, 1212, 1172, 921, 808, 724, 477  $\text{cm}^{-1}$ ; MS (ESI)  $m/z$  320.04 [ $\text{M-H}$ ] $^-$  (100%).

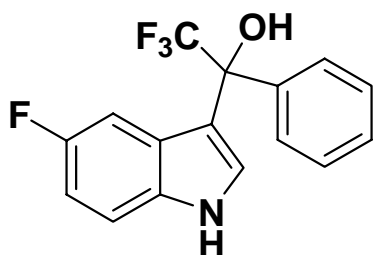

### 2,2,2-trifluoro-1-(5-fluoro-1H-indole-3-yl)-1-phenylethanol

> 99% yield, mp: 90-91 °C;  $[\alpha]_{\text{D}}^{20} = +45.2$  (c 1.0,  $\text{CH}_2\text{Cl}_2$ ); 92% ee, [Daicel Chiralcel OD-H, Hexane/*i*-PrOH = 98/2, 1.0 mL/min, 254 nm; t (minor) = 94.915 min, t (major) = 102.483 min];  $^{19}\text{F}$  NMR (376 MHz,  $\text{CDCl}_3$ )  $\delta$  [ppm] -77.2 (s, 3F), -123.3 ~ -123.4 (m, 1F);  $^1\text{H}$  NMR (500MHz,  $\text{CDCl}_3$ )  $\delta$  [ppm] 8.30 (br, 1H), 7.58-7.56 (m, 2H), 7.51-7.50 (m, 1H), 7.37-7.35 (m, 3H), 7.31-7.28 (m, 1H), 6.94-6.90 (m, 1H), 6.81 (dd,  $J = 7.5, 2.5$  Hz, 1H), 2.86 (s, 1H);  $^{13}\text{C}$  NMR (125 MHz,  $\text{CDCl}_3$ )  $\delta$  [ppm] 157.9 (d,  $^1J_{\text{C-F}} = 234.4$  Hz), 137.5, 133.0, 128.9, 128.3, 127.7 (d,  $^3J_{\text{C-F}} = 1.0$  Hz), 125.9 (q,  $^3J_{\text{C-F}} = 10.5$  Hz), 125.5 (q,  $^1J_{\text{C-F}} = 284.5$  Hz), 125.0 (q,  $^3J_{\text{C-F}} = 3.0$  Hz), 114.6 (d,  $^4J_{\text{C-F}} = 4.8$  Hz), 112.2 (d,  $^3J_{\text{C-F}} = 9.6$  Hz), 111.6 (d,  $^2J_{\text{C-F}} = 26.5$  Hz), 106.2 (d,  $^2J_{\text{C-F}} = 24.4$  Hz), 77.1 (q,  $^2J_{\text{C-F}} = 29.4$  Hz); IR (KBr)  $\nu$  ( $\text{cm}^{-1}$ ) 3465, 2924, 1584, 1486, 1167, 1028, 804, 719  $\text{cm}^{-1}$ ; MS (ESI)  $m/z$  308.06 [ $\text{M-H}$ ] $^-$  (100%).

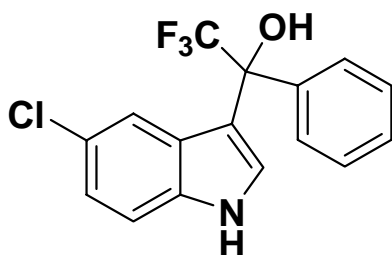

### 1-(5-chloro-1H-indole-3-yl)-2,2,2-trifluoro-1-phenylethanol

> 99% yield, mp: 104-106 °C;  $[\alpha]_D^{20} = -7.8$  (c 1.0, CH<sub>2</sub>Cl<sub>2</sub>); 90% ee, [Daicel Chiralcel AD-H, Hexane/*i*-PrOH = 95/5, 1.0 mL/min, 254 nm; t (major) = 49.317 min, t (minor) = 55.342 min]; **<sup>19</sup>F NMR** (376 MHz, CDCl<sub>3</sub>) δ [ppm] -75.3 (s, 3F); **<sup>1</sup>H NMR** (500MHz, CDCl<sub>3</sub>) δ [ppm] 8.35 (br, 1H), 7.58-7.57 (m, 2H), 7.46 (s, 1H), 7.38-7.36 (m, 3H), 7.28 (d, *J* = 8.5 Hz, 1H), 7.18-7.17 (m, 1H), 7.13-7.11 (m, 1H), 2.96 (s, 1H); **<sup>13</sup>C NMR** (150 MHz, CDCl<sub>3</sub>) δ [ppm] 140.5, 135.1, 134.8, 128.9, 128.5, 127.9 (q, <sup>3</sup>*J*<sub>C-F</sub> = 1.9 Hz), 127.8, 126.2 (q, <sup>1</sup>*J*<sub>C-F</sub> = 284.5 Hz), 121.5, 121.1 (q, <sup>3</sup>*J*<sub>C-F</sub> = 1.4 Hz), 120.1, 110.3, 109.9, 78.9 (q, <sup>2</sup>*J*<sub>C-F</sub> = 30.0 Hz); **IR** (KBr) ν (cm<sup>-1</sup>) 3478, 3404, 1464, 1290, 1182, 1054, 812, 701 cm<sup>-1</sup>; **MS (ESI)** m/z 324.10 [M-H]<sup>-</sup> (100%), 359.78.

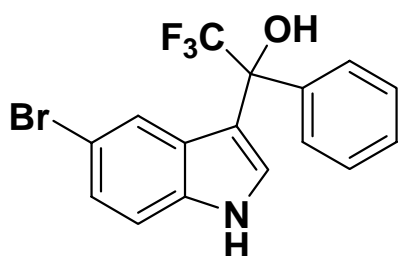

#### 1-(5-bromo-1H-indole-3-yl)-2,2,2-trifluoro-1-phenylethanol

> 52% yield, mp: 108-110 °C;  $[\alpha]_D^{20} = -12.8$  (c 1.0, CH<sub>2</sub>Cl<sub>2</sub>); 92% ee, [Daicel Chiralcel OD-H, Hexane/*i*-PrOH = 98/2, 1.0 mL/min, 254 nm; t (major) = 118.983 min, t (minor) = 136.938 min]; **<sup>19</sup>F NMR** (376 MHz, CDCl<sub>3</sub>) δ [ppm] -77.2 (s, 3F); **<sup>1</sup>H NMR** (500MHz, CDCl<sub>3</sub>) δ [ppm] 8.33 (br, 1H), 7.57-7.55 (m, 2H), 7.46 (s, 1H), 7.37-7.34 (m, 4H), 7.26 (s, 2H), 2.87 (s, 1H); **<sup>13</sup>C NMR** (125 MHz, CDCl<sub>3</sub>) δ [ppm] 137.4, 135.1, 129.0, 128.3, 127.7 (d, <sup>3</sup>*J*<sub>C-F</sub> = 0.9 Hz), 127.2, 126.0, 125.5 (q, <sup>1</sup>*J*<sub>C-F</sub> = 284.6 Hz), 124.5 (q, <sup>3</sup>*J*<sub>C-F</sub> = 2.9 Hz), 123.8, 114.2, 113.8, 112.9, 77.4 (q, <sup>2</sup>*J*<sub>C-F</sub> = 30.0 Hz); **IR** (KBr) ν (cm<sup>-1</sup>) 3482, 3379, 3067, 2924, 1467, 1288, 1180, 1046, 809, 727 cm<sup>-1</sup>; **MS (ESI)** m/z 738.47 [2M-H]<sup>-</sup> (100%), 370.12 [M-H]<sup>-</sup> (82%).

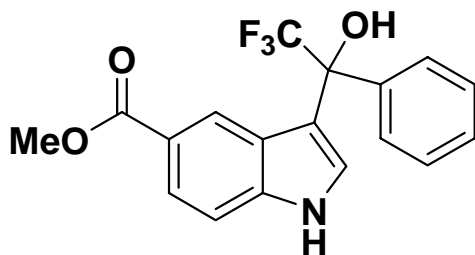

#### Methyl 3-(2,2,2-trifluoro-1-hydroxy-1-phenylethyl)-1H-indole-5-carboxylate

93% yield, mp: 173-175 °C;  $[\alpha]_D^{20} = +23.2$  (c 1.0, CH<sub>2</sub>Cl<sub>2</sub>); 90% ee, [Daicel Chiralcel

AD-H, Hexane/*i*-PrOH = 90/10, 1.0 mL/min, 254 nm; t (major) = 21.241 min, t (minor) = 32.922 min];  $^{19}\text{F}$  NMR (376 MHz,  $\text{CDCl}_3$ )  $\delta$  [ppm] -77.1 (s, 3F);  $^1\text{H}$  NMR (500MHz,  $\text{CDCl}_3$ )  $\delta$  [ppm] 8.47 (br, 1H), 7.97 (s, 1H), 7.88 (dd,  $J = 7.0, 2.0$  Hz, 1H), 7.60-7.58 (m, 2H), 7.51 (s, 1H), 7.39 (d,  $J = 9.0$  Hz, 1H), 7.37-7.35 (m, 3H), 3.82 (s, 3H), 2.94 (s, 1H);  $^{13}\text{C}$  NMR (150 MHz,  $\text{CDCl}_3$ )  $\delta$  [ppm] 168.2, 139.2, 137.8, 128.9, 128.6, 128.3, 127.7, 125.6 (q,  $^1J_{\text{C-F}} = 284.6$  Hz), 125.1, 124.9 (q,  $^3J_{\text{C-F}} = 2.8$  Hz), 124.2, 122.4, 115.6, 111.3, 77.2 (q,  $^3J_{\text{C-F}} = 30.0$  Hz); IR (KBr)  $\nu$  ( $\text{cm}^{-1}$ ) 3526, 3354, 1699, 1620, 1435, 1279, 1182, 1157, 1044, 749  $\text{cm}^{-1}$ ; MS (ESI)  $m/z$  348.23 [ $\text{M-H}^-$ ] (100%).

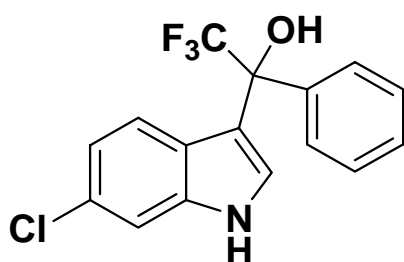

#### 1-(6-chloro-1H-indole-3-yl)-2,2,2-trifluoro-1-phenylethanol

96% yield, mp: 110-111 °C;  $[\alpha]_{\text{D}}^{20} = +55.4$  (c 1.0,  $\text{CH}_2\text{Cl}_2$ ); ee 92 %, [Daicel Chiralcel OD-H, Hexane/*i*-PrOH = 98/2, 1.0 mL/min, 254 nm; t (minor) = 83.007 min, t (major) = 86.323 min];  $^{19}\text{F}$  NMR (376 MHz,  $\text{CDCl}_3$ )  $\delta$  [ppm] -77.3 (s, 3F);  $^1\text{H}$  NMR (500MHz,  $\text{CDCl}_3$ )  $\delta$  [ppm] 8.28 (br, 1H), 7.56-7.54 (m, 2H), 7.47-7.46 (m, 1H), 7.38-7.34 (m, 4H), 7.04 (d,  $J = 8.5$  Hz, 1H), 6.92-6.90 (m, 1H), 2.85 (s, 1H);  $^{13}\text{C}$  NMR (125 MHz,  $\text{CDCl}_3$ )  $\delta$  [ppm] 137.6, 136.9, 129.0, 128.9, 128.3, 127.8 (d,  $^3J_{\text{C-F}} = 1.0$  Hz), 125.5 (q,  $^1J_{\text{C-F}} = 284.6$  Hz), 124.1, 124.0 (q,  $^3J_{\text{C-F}} = 3.0$  Hz), 122.1, 121.3, 114.6, 111.4, 77.1 (q,  $^2J_{\text{C-F}} = 30.0$  Hz); IR (KBr)  $\nu$  ( $\text{cm}^{-1}$ ) 3504, 3391, 3134, 2923, 1543, 1451, 1269, 1168, 1040, 886, 730  $\text{cm}^{-1}$ ; MS (ESI)  $m/z$  324.14 [ $\text{M-H}^-$ ] (100%).

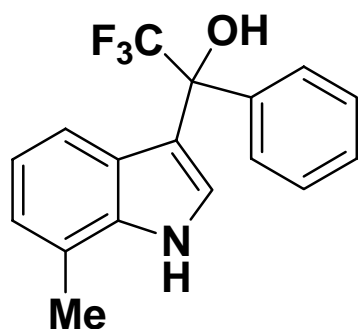

#### 2,2,2-trifluoro-1-(7-methyl-1H-indole-3-yl)-1-phenylethanol



> 99% yield, mp: 89-90 °C;  $[\alpha]_D^{20} = +75.5$  (c 1.0, CH<sub>2</sub>Cl<sub>2</sub>); 95% ee, [Daicel Chiralcel OD-H, Hexane/*i*-PrOH = 80/20, 0.8 mL/min, 254 nm; t (major) = 6.335 min, t (minor) = 10.299 min]; **<sup>19</sup>F NMR** (376 MHz, CDCl<sub>3</sub>) δ [ppm] -77.1 (s, 3F); **<sup>1</sup>H NMR** (500MHz, CDCl<sub>3</sub>) δ [ppm] 8.20 (br, 1H), 7.62-7.61 (m, 2H), 7.47 (s, 1H), 7.37-7.36 (m, 3H), 7.01 (t, *J* = 8.0 Hz, 2H), 6.90 (t, *J* = 8.0 Hz, 1H), 2.92 (s, 1H), 2.51 (s, 3H); **<sup>13</sup>C NMR** (125 MHz, CDCl<sub>3</sub>) δ [ppm] 138.0, 136.1, 128.7, 128.2, 127.9 (d, <sup>3</sup>*J*<sub>C-F</sub> = 0.9 Hz), 125.6 (q, <sup>1</sup>*J*<sub>C-F</sub> = 284.6 Hz), 124.9, 123.5, 123.2 (q, <sup>3</sup>*J*<sub>C-F</sub> = 3.0 Hz), 120.7, 118.9, 114.8, 77.3 (q, <sup>2</sup>*J*<sub>C-F</sub> = 29.5 Hz), 16.8; **IR** (KBr) ν (cm<sup>-1</sup>) 3419, 3059, 2924, 1618, 1547, 1496, 1271, 1159, 1045, 885, 753, 725, 518 cm<sup>-1</sup>; **MS (ESI)** m/z 304.24 [M-H]<sup>-</sup> (100%).

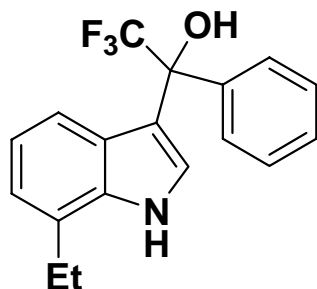

### 2,2,2-trifluoro-1-(7-ethyl-1H-indole-3-yl)-1-phenylethanol

> 99% yield, mp: 80-81 °C;  $[\alpha]_D^{20} = +89.2$  (c 1.0, CH<sub>2</sub>Cl<sub>2</sub>); 98% ee, [Daicel Chiralcel OD-H, Hexane/*i*-PrOH = 90/10, 1.0 mL/min, 254 nm; t (major) = 8.493 min, t (minor) = 14.094 min]; **<sup>19</sup>F NMR** (376 MHz, CDCl<sub>3</sub>) δ [ppm] -77.1 (s, 3F); **<sup>1</sup>H NMR** (500MHz, CDCl<sub>3</sub>) δ [ppm] 8.23 (br, 1H), 7.61-7.59 (m, 2H), 7.49-7.48 (m, 1H), 7.35-7.34 (m, 3H), 7.01 (t, *J* = 7.5 Hz, 2H), 6.91 (t, *J* = 7.5 Hz, 1H), 2.90-2.86 (m, 3H), 1.38 (t, *J* = 7.5 Hz, 3H); **<sup>13</sup>C NMR** (125 MHz, CDCl<sub>3</sub>) δ [ppm] 138.0, 135.4, 128.7, 128.2, 127.9, 126.9, 125.6 (q, <sup>1</sup>*J*<sub>C-F</sub> = 284.6 Hz), 125.1, 123.1 (q, <sup>3</sup>*J*<sub>C-F</sub> = 2.9 Hz), 121.5, 120.8, 118.9, 114.7, 77.3 (q, <sup>2</sup>*J*<sub>C-F</sub> = 29.3 Hz), 24.1, 14.0; **IR** (KBr) ν (cm<sup>-1</sup>) 3425, 3060, 2967, 1547, 1495, 1455, 1270, 1157, 1036, 884, 725 cm<sup>-1</sup>; **MS (ESI)** m/z 318.31 [M-H]<sup>-</sup> (100%).

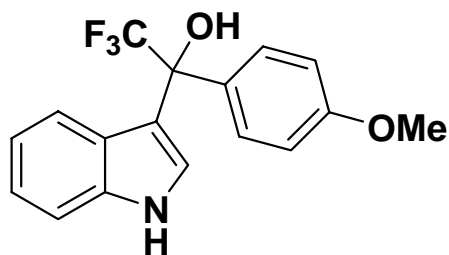

### 2,2,2-trifluoro-1-(1H-indole-3-yl)-1-(4-methoxyphenyl)ethanol

>99% yield, mp: 49-50 °C;  $[\alpha]_{\text{D}}^{20} = +46.6$  (c 1.0, CH<sub>2</sub>Cl<sub>2</sub>); 87% ee, [Daicel Chiralcel OD-H, Hexane/*i*-PrOH = 90/10, 0.8 mL/min, 254 nm; t (major) = 20.341 min, t (minor) = 25.808 min]; **<sup>19</sup>F NMR** (376 MHz, CDCl<sub>3</sub>) δ [ppm] -77.3 (s, 3F); **<sup>1</sup>H NMR** (500MHz, CDCl<sub>3</sub>) δ [ppm] 8.26 (br, 1H), 7.50-7.46 (m, 3H), 7.39 (d, *J* = 8.0 Hz, 1H), 7.20-7.17 (m, 2H), 6.96 (t, *J* = 8.0 Hz, 1H), 6.86 (d, *J* = 9.0 Hz, 2H), 3.81 (s, 3H), 2.83 (s, 1H); **<sup>13</sup>C NMR** (125 MHz, CDCl<sub>3</sub>) δ [ppm] 159.8, 136.5, 130.1, 129.2, 125.7 (q, <sup>1</sup>*J*<sub>C-F</sub> = 284.4 Hz), 125.5, 123.5 (q, <sup>3</sup>*J*<sub>C-F</sub> = 3.0 Hz), 122.9, 121.3, 120.4, 114.3, 113.5, 111.5, 77.0 (q, <sup>2</sup>*J*<sub>C-F</sub> = 29.5 Hz), 55.4; **IR** (KBr) ν (cm<sup>-1</sup>) 3416, 2919, 2851, 1611, 1513, 1459, 1253, 1159, 1038, 829, 745, 593 cm<sup>-1</sup>; **MS (ESI)** m/z 320.4 [M-H]<sup>-</sup> (100%).

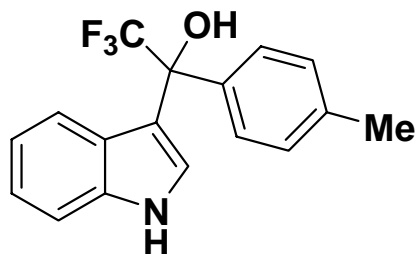

### 2,2,2-trifluoro-1-(1H-indole-3-yl)-1-*p*-tolylolethanol

> 99% yield, mp: 102-103 °C;  $[\alpha]_{\text{D}}^{20} = +56.8$  (c 1.0, CH<sub>2</sub>Cl<sub>2</sub>); 91% ee, [Daicel Chiralcel OD-H, Hexane/*i*-PrOH = 90/10, 1.0 mL/min, 254 nm; t (major) = 11.763 min, t (minor) = 14.055 min]; **<sup>19</sup>F NMR** (376 MHz, CDCl<sub>3</sub>) δ [ppm] -77.3 (s, 3F); **<sup>1</sup>H NMR** (400MHz, CDCl<sub>3</sub>) δ [ppm] 8.27 (br, 1H), 7.48-7.46 (m, 3H), 7.38 (d, *J* = 8.4 Hz, 1H), 7.19-7.14 (m, 4H), 6.96 (t, *J* = 7.2 Hz, 1H), 2.88 (s, 1H), 2.35 (s, 3H); **<sup>13</sup>C NMR** (125 MHz, CDCl<sub>3</sub>) δ [ppm] 138.5, 136.5, 135.0, 128.9, 127.7 (d, <sup>3</sup>*J*<sub>C-F</sub> = 0.9 Hz), 125.6 (q, <sup>1</sup>*J*<sub>C-F</sub> = 284.5 Hz), 125.5, 123.4 (q, <sup>3</sup>*J*<sub>C-F</sub> = 3.0 Hz), 122.9, 121.3, 120.5, 114.4, 111.4, 77.2 (q, <sup>2</sup>*J*<sub>C-F</sub> = 29.2 Hz), 21.4; **IR** (KBr) ν (cm<sup>-1</sup>) 3587, 3415, 3142, 2924, 1547, 1456, 1279, 1152, 1038, 922, 812, 749, 588 cm<sup>-1</sup>; **MS (ESI)** m/z 304.4 [M-H]<sup>-</sup> (100%).

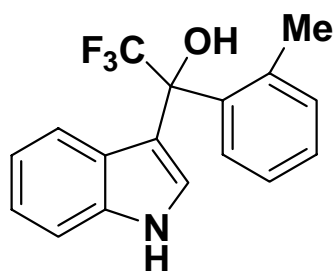

### 2,2,2-trifluoro-1-(1H-indole-3-yl)-1-*o*-tolylethanol

81% yield, mp: 136-139 °C;  $[\alpha]_D^{20} = +26.6^\circ$  (c 1.0, CH<sub>2</sub>Cl<sub>2</sub>); 86% ee, [Daicel Chiralcel OD-H, Hexane/*i*-PrOH = 90/10, 1.0 mL/min, 254 nm; t (major) = 9.837 min, t (minor) = 11.713 min]; **<sup>19</sup>F NMR** (376 MHz, CDCl<sub>3</sub>)  $\delta$  [ppm] -76.0 (s, 3F); **<sup>1</sup>H NMR** (500MHz, CDCl<sub>3</sub>)  $\delta$  [ppm] 8.26 (br, 1H), 7.73 (d,  $J = 7.5$  Hz, 1H), 7.38 (d,  $J = 8.0$  Hz, 1H), 7.35-7.34 (m, 1H), 7.29-7.26 (m, 1H), 7.25-7.22 (m, 1H), 7.19-7.16 (m, 1H), 7.14-7.09 (m, 2H), 6.96-6.93 (m, 1H), 2.77 (s, 1H), 2.13 (s, 3H); **<sup>13</sup>C NMR** (125 MHz, CDCl<sub>3</sub>)  $\delta$  [ppm] 138.7, 136.4, 135.6, 133.0, 129.0, 128.8 (d,  $^3J_{C-F} = 1.0$  Hz), 126.0 (q,  $^1J_{C-F} = 285.1$  Hz), 125.7, 125.6, 123.6 (q,  $^3J_{C-F} = 2.4$  Hz), 122.9, 120.9, 120.5, 114.9, 111.4, 78.2 (q,  $^2J_{C-F} = 29.3$  Hz), 21.8; **IR** (KBr)  $\nu$  (cm<sup>-1</sup>) 3502, 3415, 3141, 2926, 1548, 1459, 1271, 1171, 1022, 922, 748, 585 cm<sup>-1</sup>; **MS (ESI)**  $m/z$  304.4 [M-H]<sup>-</sup> (100%).

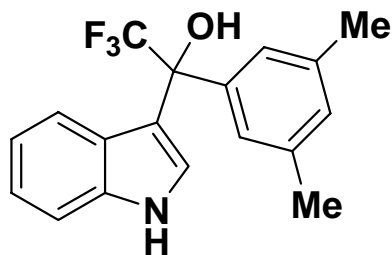

### 2,2,2-trifluoro-1-(1H-indole-3-yl)-1-(3,5-dimethylphenyl)ethanol

> 99% yield, mp: 158-159 °C;  $[\alpha]_D^{20} = +55.7^\circ$  (c 1.0, CH<sub>2</sub>Cl<sub>2</sub>); 85% ee, [Daicel Chiralcel OD-H, Hexane/*i*-PrOH = 90/10, 0.8 mL/min, 254 nm; t (major) = 11.068 min, t (minor) = 12.268 min]; **<sup>19</sup>F NMR** (376 MHz, CDCl<sub>3</sub>)  $\delta$  [ppm] -77.1 (s, 3F); **<sup>1</sup>H NMR** (400MHz, CDCl<sub>3</sub>)  $\delta$  [ppm] 8.25 (br, 1H), 7.44-7.43 (m, 1H), 7.38 (d,  $J = 8.0$  Hz, 1H), 7.24-7.16 (m, 4H), 6.99-6.96 (m, 2H), 2.86 (s, 1H), 2.29 (s, 6H); **<sup>13</sup>C NMR** (125 MHz, CDCl<sub>3</sub>)  $\delta$  [ppm] 137.7, 137.6, 136.5, 130.5, 125.7 (q,  $^1J_{C-F} = 284.5$  Hz), 125.5, 123.4 (q,  $^3J_{C-F} = 2.9$  Hz), 121.4, 120.5, 114.5, 111.4, 77.3 (q,  $^2J_{C-F} = 29.3$  Hz), 30.0, 21.7; **IR** (KBr)  $\nu$  (cm<sup>-1</sup>) 3526, 3342, 2923, 2856, 1539, 1461, 1245, 1180, 1042,

847, 758  $\text{cm}^{-1}$ ; **MS (ESI)**  $m/z$  318.4  $[\text{M-H}]^-$  (100%).

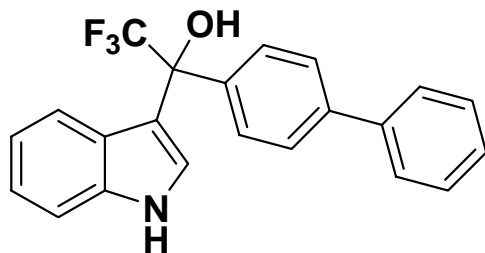

### 2,2,2-trifluoro-1-(1H-indole-3-yl)-1-biphenylethanol

> 99% yield, mp: 177-178 °C;  $[\alpha]_{\text{D}}^{20} = +23.5$  (c 1.0,  $\text{CH}_2\text{Cl}_2$ ); 90% ee, [Daicel Chiralcel OD-H, Hexane/*i*-PrOH = 90/10, 1.0 mL/min, 254 nm; t (major) = 17.174 min, t (minor) = 20.818 min];  **$^{19}\text{F}$  NMR** (376 MHz,  $\text{CDCl}_3$ )  $\delta$  [ppm] -77.1 (s, 3F);  **$^1\text{H}$  NMR** (400MHz,  $\text{CDCl}_3$ )  $\delta$  [ppm] 8.27 (br, 1H), 7.67-7.57 (m, 6H), 7.50-7.34 (m, 5H), 7.26-7.18 (m, 2H), 6.98 (t,  $J = 8.0$  Hz, 1H), 2.93 (s, 1H);  **$^{13}\text{C}$  NMR** (125 MHz,  $\text{CDCl}_3$ )  $\delta$  [ppm] 141.4, 140.7, 136.9, 136.5, 129.0, 128.3, 127.7, 127.4, 126.9, 125.6 (q,  $^1J_{\text{C-F}} = 284.6$  Hz), 125.4, 123.5 (q,  $^3J_{\text{C-F}} = 2.9$  Hz), 123.1, 121.3, 120.6, 114.2, 111.5, 77.2 (q,  $^2J_{\text{C-F}} = 29.5$  Hz); **IR** (KBr)  $\nu$  ( $\text{cm}^{-1}$ ) 3521, 3452, 1549, 1458, 1273, 1166, 1045, 832, 751  $\text{cm}^{-1}$ ; **MS (ESI)**  $m/z$  366.4  $[\text{M-H}]^-$  (100%).

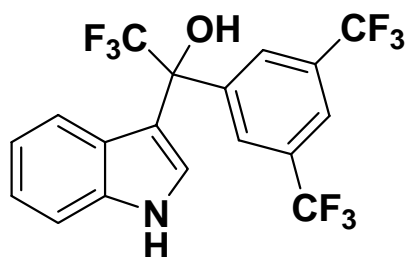

### (3,5-bis(trifluoromethyl)phenyl)-2,2,2-trifluoro-1-(1H-indole-3-yl)-1-ethanol

> 99% yield, mp: 144-146 °C;  $[\alpha]_{\text{D}}^{20} = +52.4$  (c 1.0,  $\text{CH}_2\text{Cl}_2$ ); 90% ee, [Daicel Chiralcel OD-H, Hexane/*i*-PrOH = 90/10, 0.8 mL/min, 254 nm; t (major) = 7.053 min, t (minor) = 7.828 min];  **$^{19}\text{F}$  NMR** (376 MHz,  $\text{CDCl}_3$ )  $\delta$  [ppm] -63.1 (s, 6F), -77.4 (s, 3F);  **$^1\text{H}$  NMR** (400MHz,  $\text{CDCl}_3$ )  $\delta$  [ppm] 8.43 (br, 1H), 8.07 (s, 2H), 7.89 (s, 1H), 7.55 (s, 1H), 7.42 (d,  $J = 8.4$  Hz, 1H), 7.21 (t,  $J = 7.6$  Hz, 1H), 7.08-6.97 (m, 2H), 3.13 (s, 1H);  **$^{13}\text{C}$  NMR** (125 MHz,  $\text{CDCl}_3$ )  $\delta$  [ppm] 140.8, 136.5, 131.7 (q,  $^2J_{\text{C-F}} = 33.3$  Hz), 128.3, 124.9 (q,  $^1J_{\text{C-F}} = 284.8$  Hz), 124.6, 123.6 (q,  $^3J_{\text{C-F}} = 3.0$  Hz), 123.5, 123.4 (q,  $^1J_{\text{C-F}} = 271.3$  Hz), 123.0 (q,  $^3J_{\text{C-F}} = 3.8$  Hz), 121.0, 120.4, 112.4, 111.8, 76.8 (q,  $^2J_{\text{C-F}} = 29.9$  Hz); **IR** (KBr)  $\nu$  ( $\text{cm}^{-1}$ ) 3457, 3403, 3114, 2923, 1543, 1462, 1280,

1181, 1130, 887, 753  $\text{cm}^{-1}$ ; **MS (ESI)**  $m/z$  426.3  $[\text{M-H}]^-$  (100%).

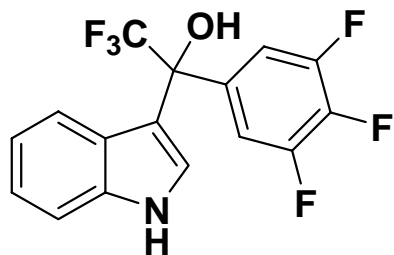

### 2,2,2-trifluoro-1-(1H-indole-3-yl)-1-3,4,5-trifluorophenylethanol

91% yield, mp: 134-135 °C;  $[\alpha]_{\text{D}}^{20} = +53.3$  (c 1.0,  $\text{CH}_2\text{Cl}_2$ ); 85% ee, [Daicel Chiralcel OD-H, Hexane/*i*-PrOH = 90/10, 0.8 mL/min, 254 nm;  $t$  (major) = 9.997 min,  $t$  (minor) = 18.606 min];  **$^{19}\text{F}$  NMR** (376 MHz,  $\text{CDCl}_3$ )  $\delta$  [ppm] -77.5 (s, 3F), -134.4 ~ -134.5 (m, 2F), -160.3 ~ -160.4 (m, 1F).  **$^1\text{H}$  NMR** (400MHz,  $\text{CDCl}_3$ )  $\delta$  [ppm] 8.36 (br, 1H), 7.49 (s, 1H), 7.42 (d,  $J = 8.0$  Hz, 1H), 7.23 (q,  $J = 7.0$  Hz, 3H), 7.15 (d,  $J = 8.0$  Hz, 1H), 7.02 (t,  $J = 7.5$  Hz, 1H), 3.00 (br, 1H).  **$^{13}\text{C}$  NMR** (125 MHz,  $\text{CDCl}_3$ )  $\delta$  [ppm] 151.0 (dq,  $J_{\text{C-F}} = 248.1, 6.1, 3.9$  Hz), 140.0 (dt,  $J_{\text{C-F}} = 251.6, 15.0$  Hz), 136.5, 134.3 (dt,  $J_{\text{C-F}} = 9.1, 4.6$  Hz), 128.9, 128.5, 124.9 (q,  $^1J_{\text{C-F}} = 285.1$  Hz), 124.8, 123.5, 123.4 (q,  $^3J_{\text{C-F}} = 3.1$  Hz), 122.2, 120.8 (d,  $^2J_{\text{C-F}} = 40.4$  Hz), 120.2, 119.5, 111.8, 76.4 (q,  $^2J_{\text{C-F}} = 30.1$  Hz); **IR** (KBr)  $\nu$  ( $\text{cm}^{-1}$ ) 3525, 3452, 3071, 2925, 1623, 1532, 1493, 1443, 1421, 1362, 1340, 1270, 1210, 1171, 1110, 1035, 904, 858, 758, 717  $\text{cm}^{-1}$ ; **MS (ESI)**  $m/z$  344.3  $[\text{M-H}]^-$  (100%).

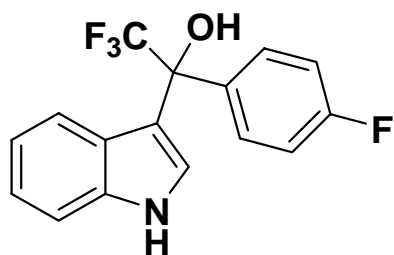

### 2,2,2-trifluoro-1-(4-fluorophenyl)-1-(1H-indole-3-yl)ethanol

> 99% yield, mp: 130-131 °C;  $[\alpha]_{\text{D}}^{20} = +83.5$  (c 1.0,  $\text{CH}_2\text{Cl}_2$ ); 89% ee, [Daicel Chiralcel OD-H, Hexane/*i*-PrOH = 80/20, 0.8 mL/min, 254 nm;  $t$  (major) = 7.297 min,  $t$  (minor) = 11.306 min];  **$^{19}\text{F}$  NMR** (376 MHz,  $\text{CDCl}_3$ )  $\delta$  [ppm] -77.6 (s, 3F), -114.2 ~ -114.3 (m, 1F);  **$^1\text{H}$  NMR** (500MHz,  $\text{CDCl}_3$ )  $\delta$  [ppm] 8.29 (br, 1H), 7.57-7.54 (m, 2H),

7.49-7.48 (m, 1H), 7.40 (d,  $J = 8.0$  Hz, 1H), 7.21-7.18 (m, 1H), 7.12 (d,  $J = 8.0$  Hz, 1H), 7.04-6.95 (m, 3H), 2.86 (s, 1H);  $^{13}\text{C}$  NMR (125 MHz,  $\text{CDCl}_3$ )  $\delta$  [ppm] 163.1(d,  $^1J_{\text{C-F}} = 245.9$  Hz), 136.5, 133.7 (d,  $^4J_{\text{C-F}} = 3.1$  Hz), 129.9 (d,  $^3J_{\text{C-F}} = 8.4$  Hz), 125.4 (q,  $^1J_{\text{C-F}} = 284.4$  Hz), 125.2, 123.4 (q,  $^3J_{\text{C-F}} = 3.1$  Hz), 123.1, 121.1, 120.6, 115.1 (d,  $^2J_{\text{C-F}} = 21.5$  Hz), 114.0, 111.6, 76.9 (q,  $^2J_{\text{C-F}} = 29.8$  Hz); IR (KBr)  $\nu$  ( $\text{cm}^{-1}$ ) 3544, 3482, 3409, 3326, 1509, 1459, 1276, 1189, 830, 746  $\text{cm}^{-1}$ ; MS (ESI)  $m/z$  308.51 [ $\text{M-H}^-$ ] (100%).

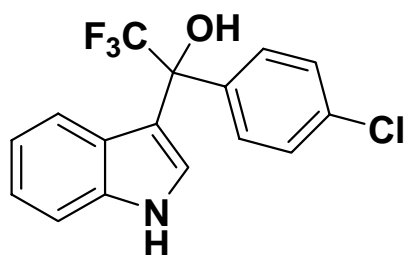

#### 1-(4-chlorophenyl)-2,2,2-trifluoro-1-(1H-indole-3-yl)ethanol

> 99% yield, mp: 112-113 °C;  $[\alpha]_{\text{D}}^{20} = +52.6$  (c 1.0,  $\text{CH}_2\text{Cl}_2$ ); 99% ee, [Daicel Chiralcel OD-H, Hexane/*i*-PrOH = 80/20, 0.8 mL/min, 254 nm; t (major) = 6.531 min, t (minor) = 9.856 min];  $^{19}\text{F}$  NMR (376 MHz,  $\text{CDCl}_3$ )  $\delta$  [ppm] -77.3 (s, 3F);  $^1\text{H}$  NMR (500MHz,  $\text{CDCl}_3$ )  $\delta$  [ppm] 8.34 (br, 1H), 7.55 (d,  $J = 8.5$  Hz, 2H), 7.46 (s, 1H), 7.38 (d,  $J = 8.5$  Hz, 1H), 7.33 (d,  $J = 8.5$  Hz, 2H), 7.22 (t,  $J = 8.0$  Hz, 1H), 7.17 (d,  $J = 8.0$  Hz, 1H), 7.00 (t,  $J = 7.5$  Hz, 1H), 3.09 (s, 1H);  $^{13}\text{C}$  NMR (125 MHz,  $\text{CDCl}_3$ )  $\delta$  [ppm] 136.6, 136.5, 134.9, 129.5, 128.5, 125.4 (q,  $^1J_{\text{C-F}} = 284.6$  Hz), 125.2, 123.5 (q,  $^3J_{\text{C-F}} = 2.9$  Hz), 123.2, 121.0, 120.7, 113.6, 111.7, 77.0 (q,  $^2J_{\text{C-F}} = 30.0$  Hz); IR (KBr)  $\nu$  ( $\text{cm}^{-1}$ ) 3412, 3059, 2925, 1544, 1492, 1272, 1161, 820, 741  $\text{cm}^{-1}$ ; MS (ESI)  $m/z$  324.08 [ $\text{M-H}^-$ ] (100%).

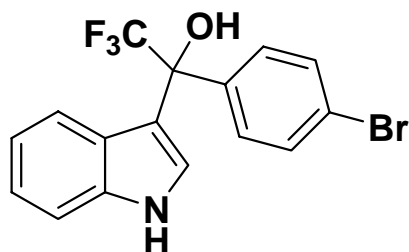

#### 1-(4-bromophenyl)-2,2,2-trifluoro-1-(1H-indole-3-yl)ethanol

> 99% yield;  $[\alpha]_D^{20} = +45.7$  (c 1.0,  $\text{CH}_2\text{Cl}_2$ ); 87% ee, [Daicel Chiralcel OD-H, Hexane/*i*-PrOH = 90/10, 1.0 mL/min, 254 nm; t (major) = 11.324 min, t (minor) = 17.834 min];  $^{19}\text{F}$  NMR (376 MHz,  $\text{CDCl}_3$ )  $\delta$  [ppm] -77.3 (s, 3F);  $^1\text{H}$  NMR (500MHz,  $\text{CDCl}_3$ )  $\delta$  [ppm] 8.32 (br, 1H), 7.47 (s, 5H), 7.39 (d,  $J = 8.5$  Hz, 1H), 7.20 (t,  $J = 8.0$  Hz, 1H), 7.14 (d,  $J = 8.0$  Hz, 1H), 6.99 (t,  $J = 8.0$  Hz, 1H), 2.98 (s, 1H);  $^{13}\text{C}$  NMR (150 MHz,  $\text{CDCl}_3$ )  $\delta$  [ppm] 137.0, 136.5, 131.4, 129.8, 125.3 (q,  $^1J_{\text{C-F}} = 284.6$  Hz), 125.2, 123.4 (q,  $^3J_{\text{C-F}} = 3.0$  Hz), 123.2, 121.0, 120.7, 113.6, 111.6, 77.0 (q,  $^2J_{\text{C-F}} = 29.8$  Hz); IR (KBr)  $\nu$  ( $\text{cm}^{-1}$ ) 3407, 3063, 2922, 1542, 1488, 1268, 1164, 1011, 924, 817, 746  $\text{cm}^{-1}$ ; MS (ESI)  $m/z$  368.3  $[\text{M-H}]^-$  (100%).

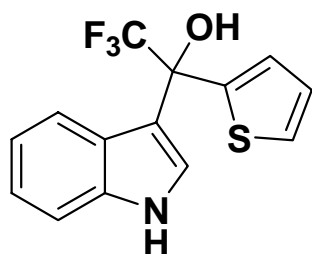

### 2,2,2-trifluoro-1-(1H-indole-3-yl)-1-(thiophene-2-yl)ethanol

84% yield;  $[\alpha]_D^{20} = +44.2$  (c1.0,  $\text{CH}_2\text{Cl}_2$ ); 86% ee, [Daicel Chiralcel AD-H, Hexane/*i*-PrOH = 95/5, 1.0 mL/min, 254 nm; t (minor) = 56.598 min, t (major) = 58.990 min];  $^{19}\text{F}$  NMR (376 MHz,  $\text{CDCl}_3$ )  $\delta$  [ppm] -77.9 (s, 3F);  $^1\text{H}$  NMR (500MHz,  $\text{CDCl}_3$ )  $\delta$  [ppm] 8.29 (br, 1H), 7.44 (d,  $J = 8.0$  Hz, 1H), 7.41-7.36 (m, 3H), 7.21 (t,  $J = 7.5$  Hz, 1H), 7.11 (s, 1H), 7.06 (t,  $J = 7.5$  Hz, 1H), 7.00-6.98 (m, 1H), 3.14 (s, 1H);  $^{13}\text{C}$  NMR (150 MHz,  $\text{CDCl}_3$ )  $\delta$  [ppm] 142.3, 136.5, 127.6 (q,  $^3J_{\text{C-F}} = 1.3$  Hz), 127.0, 126.9, 125.5, 125.2 (q,  $^1J_{\text{C-F}} = 284.4$  Hz), 123.8 (q,  $^3J_{\text{C-F}} = 2.6$  Hz), 123.0, 121.2, 120.7, 76.3 (q,  $^2J_{\text{C-F}} = 31.3$  Hz); IR (KBr)  $\nu$  ( $\text{cm}^{-1}$ ) 3421, 3063, 2925, 1619, 1544, 1459, 1423, 1275, 1156, 1089, 1027, 900, 836, 747, 714, 631  $\text{cm}^{-1}$ ; MS (ESI)  $m/z$  296.4  $[\text{M-H}]^-$  (100%).

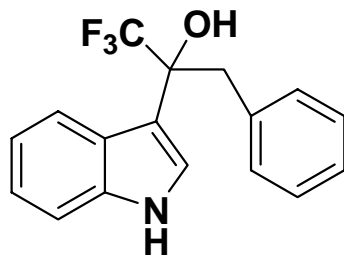

### 1,1,1-trifluoro-2-(1H-indole-3-yl)-3-phenylpropan-2-ol

86% yield;  $[\alpha]_D^{20} = +55.3$  (c 1.0,  $\text{CH}_2\text{Cl}_2$ ); 76% ee, [Daicel Chiralcel AD-H, Hexane/*i*-PrOH = 90/10, 1.0 mL/min, 254 nm; t (major) = 16.491 min, t (minor) = 18.895 min];  $^{19}\text{F}$  NMR (376 MHz,  $\text{CDCl}_3$ )  $\delta$  [ppm] -78.9 (s, 3F);  $^1\text{H}$  NMR (500MHz,  $\text{CDCl}_3$ )  $\delta$  [ppm] 8.18 (br, 1H), 7.88 (d,  $J = 8.0$  Hz, 1H), 7.40 (d,  $J = 8.0$  Hz, 1H), 7.26 (t,  $J = 7.0$  Hz, 1H), 7.21-7.15 (m, 5H), 6.99 (d,  $J = 7.0$  Hz, 2H), 3.51 (dd,  $J = 13.5, 97.5$  Hz, 2H), 2.54 (s, 1H);  $^{13}\text{C}$  NMR (150 MHz,  $\text{CDCl}_3$ )  $\delta$  [ppm] 136.9, 133.9, 131.0, 128.5, 127.5, 126.5, 126.1 (q,  $^1J_{\text{C-F}} = 284.3$  Hz), 125.4, 124.3, 122.6, 122.1, 121.3 (d,  $^3J_{\text{C-F}} = 2.0$  Hz), 120.6, 119.8, 111.8, 76.5 (q,  $^2J_{\text{C-F}} = 29.1$  Hz); IR (KBr)  $\nu$  ( $\text{cm}^{-1}$ ) 3417, 3061, 3032, 2924, 1546, 1496, 1458, 1424, 1339, 1272, 1166, 1105, 1017, 982, 948  $\text{cm}^{-1}$ ; MS (ESI)  $m/z$  304.4  $[\text{M-H}]^-$  (100%).

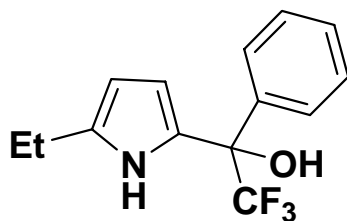

### 1-(5-ethyl-1H-pyrrol-2-yl)-2,2,2-trifluoro-1-phenylethanol

> 99% yield; mp: 55-57 °C;  $[\alpha]_D^{20} = +44.2$  (c 1.0,  $\text{CH}_2\text{Cl}_2$ ); 65% ee, [Daicel Chiralcel AD-H, Hexane/*i*-PrOH = 95/5, 1.0 mL/min, 254 nm; t (minor) = 56.598 min, t (major) = 58.990 min];  $^{19}\text{F}$  NMR (376 MHz,  $\text{CDCl}_3$ )  $\delta$  [ppm] -77.9 (s, 3F);  $^1\text{H}$  NMR (500MHz,  $\text{CDCl}_3$ )  $\delta$  [ppm] 8.29 (br, 1H), 7.44 (d,  $J = 8.0$  Hz, 1H), 7.41-7.36 (m, 3H), 7.21 (t,  $J = 7.5$  Hz, 1H), 7.11 (s, 1H), 7.06 (t,  $J = 7.5$  Hz, 1H), 7.00-6.98 (m, 1H), 3.14 (s, 1H);  $^{13}\text{C}$  NMR (150 MHz,  $\text{CDCl}_3$ )  $\delta$  [ppm] 142.3, 136.5, 127.6 (q,  $^3J_{\text{C-F}} = 1.3$  Hz), 127.0, 126.9, 125.5, 125.2 (q,  $^1J_{\text{C-F}} = 284.4$  Hz), 123.8 (q,  $^3J_{\text{C-F}} = 2.6$  Hz), 123.0,



121.2, 120.7, 76.3 (q,  $^2J_{C-F} = 31.3$  Hz); **IR** (KBr)  $\nu$  ( $\text{cm}^{-1}$ ) 3421, 3063, 2925, 1619, 1544, 1459, 1423, 1275, 1156, 1089, 1027, 900, 836, 747, 714, 631  $\text{cm}^{-1}$ ; **MS (ESI)**  $m/z$  296.4  $[\text{M-H}]^-$  (100%)

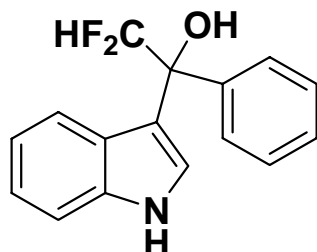

### 2,2-difluoro-1-(1H-indole-3-yl)-1-phenylethanol

92% yield, mp: 96-98 °C;  $[\alpha]_D^{20} = +54.1$  (c 1.0,  $\text{CH}_2\text{Cl}_2$ ); 90% ee, [Daicel Chiralcel OD-H, Hexane/*i*-PrOH = 90/10, 0.9 mL/min, 254 nm;  $t$  (major) = 21.961 min,  $t$  (minor) = 40.352 min];  **$^{19}\text{F}$  NMR** (376 MHz,  $\text{CDCl}_3$ )  $\delta$  [ppm] -126.9 (dd,  $J = 273.0$ , 21.1 Hz, 2F);  **$^1\text{H}$  NMR** (500MHz,  $\text{CDCl}_3$ )  $\delta$  [ppm] 8.25 (br, 1H), 7.55 (d,  $J = 8.0$  Hz, 2H), 7.45 (s, 1H), 7.40-7.34 (m, 4H), 7.24 (d,  $J = 8.0$  Hz, 1H), 7.18 (t,  $J = 8.0$  Hz, 1H), 6.97 (t,  $J = 8.0$  Hz, 1H), 6.10 (t,  $J = 56.0$  Hz, 1H), 2.76 (s, 1H);  **$^{13}\text{C}$  NMR** (125 MHz,  $\text{CDCl}_3$ )  $\delta$  [ppm] 139.6, 136.6, 128.4, 127.4, 125.8, 123.3, 122.8, 122.2, 121.3, 120.3, 119.8 (t,  $^1J_{C-F} = 244.6$  Hz), 119.5 (t,  $^3J_{C-F} = 5.0$  Hz), 117.4, 114.9, 111.4, 76.4 (q,  $^2J_{C-F} = 21.8$  Hz); **IR** (KBr)  $\nu$  ( $\text{cm}^{-1}$ ) 3450, 3424, 3151, 3060, 1617, 1546, 1457, 1334, 1172, 1069, 1037, 906, 829, 750, 698, 683, 606  $\text{cm}^{-1}$ ; **MS (ESI)**  $m/z$  272.2  $[\text{M-H}]^-$  (100%).

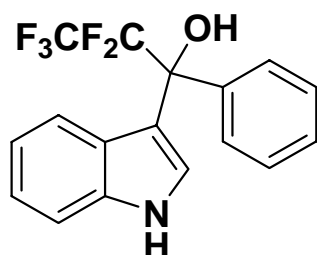

### 2,2,3,3,3-pentafluoro-1-(1H-indole-3-yl)-1-phenylpropan-1-ol

78% yield, mp: 140-141 °C;  $[\alpha]_D^{20} = +62.5$  (c 1.0,  $\text{CH}_2\text{Cl}_2$ ); 97% ee, [Daicel Chiralcel OD-H, Hexane/*i*-PrOH = 90/10, 0.9 mL/min, 254 nm;  $t$  (major) = 11.769 min,  $t$  (minor) = 18.502 min];  **$^{19}\text{F}$  NMR** (376 MHz,  $\text{CDCl}_3$ )  $\delta$  [ppm] -77.1 (s, 3F), -118.2

(dd,  $J = 308.7, 273.7$  Hz, 2F);  $^1\text{H NMR}$  (500MHz,  $\text{CDCl}_3$ )  $\delta$  [ppm] 8.25 (br, 1H), 7.65-7.64 (m, 2H), 7.54 (s, 1H), 7.37-7.34 (m, 4H), 7.19-7.15 (m, 2H), 6.94 (t,  $J = 8.0$  Hz, 1H), 2.97 (s, 1H);  $^{13}\text{C NMR}$  (125 MHz,  $\text{CDCl}_3$ )  $\delta$  [ppm] 137.9, 136.3, 128.6, 128.1, 127.6, 125.3, 123.1 (q,  $^3J_{\text{C-F}} = 4.5$  Hz), 122.9, 121.1, 120.4, 115.0, 111.4, 77.2 (q,  $^2J_{\text{C-F}} = 28.0$  Hz); **IR** (KBr)  $\nu$  ( $\text{cm}^{-1}$ ) 3474, 3410, 3148, 3062, 1551, 1455, 1348, 1220, 1181, 1134, 1052, 1024, 911, 833, 728, 698  $\text{cm}^{-1}$ ; **MS (ESI)**  $m/z$  340.2 [ $\text{M-H}^-$ ] (100%).

### Brønsted Acid-catalyzed diarylation of 2-fluoroacetophenone:

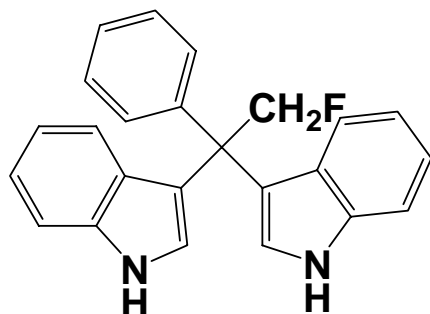

#### 3-(2-fluoro-1-(1H-indole-3-yl)-1-phenyl)-1H-indole

74% yield, mp: 72-74 °C;  $^1\text{H NMR}$  (400 MHz,  $\text{CDCl}_3$ )  $\delta$  [ppm] 8.03 (br, 2H), 7.47 (d,  $J = 6.8$  Hz, 2H), 7.37 (d,  $J = 8.0$ , 2H), 7.32-7.26 (m, 3H), 7.21 (d,  $J = 8.4$  Hz, 2H), 7.15 (t,  $J = 8.0$  Hz, 2H), 6.95-6.90 (m, 4H), 5.51 (d,  $J = 48.0$  Hz, 2H);  $^{13}\text{C NMR}$  (125 MHz,  $\text{CDCl}_3$ )  $\delta$  [ppm] 143.4 (d,  $^3J_{\text{C-F}} = 1.5$  Hz), 137.0, 129.0 (d,  $^3J_{\text{C-F}} = 2.1$  Hz), 128.3, 126.9, 126.7, 125.1 (d,  $^3J_{\text{C-F}} = 3.5$  Hz), 122.0, 121.9, 119.5, 119.4 (d,  $^3J_{\text{C-F}} = 3.6$  Hz), 111.5, 88.2 (d,  $^1J_{\text{C-F}} = 182.1$  Hz), 49.9 (d,  $^2J_{\text{C-F}} = 18.6$  Hz); **IR** (KBr)  $\nu$  ( $\text{cm}^{-1}$ ) 3412, 3053, 2918, 2849, 1597, 1456, 1415, 1338, 1245, 1100, 1011, 909, 741, 701  $\text{cm}^{-1}$ ; **MS (ESI)**  $m/z$  353.16 [ $\text{M-H}^-$ ] (100%).

#### References:

1. a) X. Creary, *J. Org. Chem.* **1987**, 52, 5026; b) J. M. Chong, E. K. Mar, *J. Org. Chem.* **1991**, 56, 893.
2. a) T. Akiyama, J. Itoh, K. Yokota, K. Fuchibe, *Angew. Chem.* **2004**, 116, 1592; b) D. Uraguchi, M. Terada, *J. Am. Chem. Soc.* **2004**, 126, 5356; c) S. Hoffmann, A. Seayad, B. List, *Angew. Chem.* **2005**, 117, 7590; d) R. I. Storer, D. E. Carrera, Y.

- Ni, D. W. C. MacMillan, *J. Am. Chem. Soc.* **2006**, 128, 84.
3. Nakashima, D.; Yamamoto, H. *J. Am. Chem. Soc.* **2006**, 128, 9626.
4. Frisch, M. J.; Trucks, G. W.; Schlegel, H. B.; Scuseria, G. E.; Robb, M. A.; Cheeseman, J. R.; Montgomery, J. A., Jr.; Vreven, T.; Kudin, K. N.; Burant, J. C.; Millam, J. M.; Iyengar, S. S.; Tomasi, J.; Barone, V.; Mennucci, B.; Cossi, M.; Scalmani, G.; Rega, N.; Petersson, G. A.; Nakatsuji, H.; Hada, M.; Ehara, M.; Toyota, K.; Fukuda, R.; Hasegawa, J.; Ishida, M.; Nakajima, T.; Honda, Y.; Kitao, O.; Nakai, H.; Klene, M.; Li, X.; Knox, J. E.; Hratchian, H. P.; Cross, J. B.; Adamo, C.; Jaramillo, J.; Gomperts, R.; Stratmann, R. E.; Yazyev, O.; Austin, A. J.; Cammi, R.; Pomelli, C.; Ochterski, J. W.; Ayala, P. Y.; Morokuma, K.; Voth, G. A.; Salvador, P.; Dannenberg, J. J.; Zakrzewski, V. G.; Dapprich, S.; Daniels, A.D.; Strain, M. C.; Farkas, O.; Malick, D. K.; Rabuck, A. D.; Raghavachari, K.; Foresman, J. B.; Ortiz, J. V.; Cui, Q.; Baboul, A. G.; Clifford, S.; Cioslowski, J.; Stefanov, B. B.; Liu, G.; Liashenko, A.; Piskorz, P.; Komaromi, I.; Martin, I. L.; Fox, D. J.; Keith, T.; Al-Laham, M. A.; Peng, C.Y.; Nanayakkara, A.; Challacombe, M.; Gill, P. M. W.; Johnson, B.; Chen, W.; Wong, M. W.; Gonzales, C.; Pople, J. A. Gaussian03, Revision D.01; Gaussian, Inc.; Wallingford CT, 2004.
5. (a) Becke, A. D. *J. Chem. Phys.* **1993**, 98, 1372-1377. (b) Becke, A. D. *J. Chem. Phys.* **1993**, 98, 5648-5652. (c) Becke, A. D. *Phys. Rev. A* **1988**, 38, 3098-3100. (c) Lee, C.; Yang, W.; Parr, R. G. *Phys. Rev. B* **1988**, 37, 785-789.
6. Somei, M.; Kobayashi, T. *Heterocycles*, **1992**, 34, 1295.

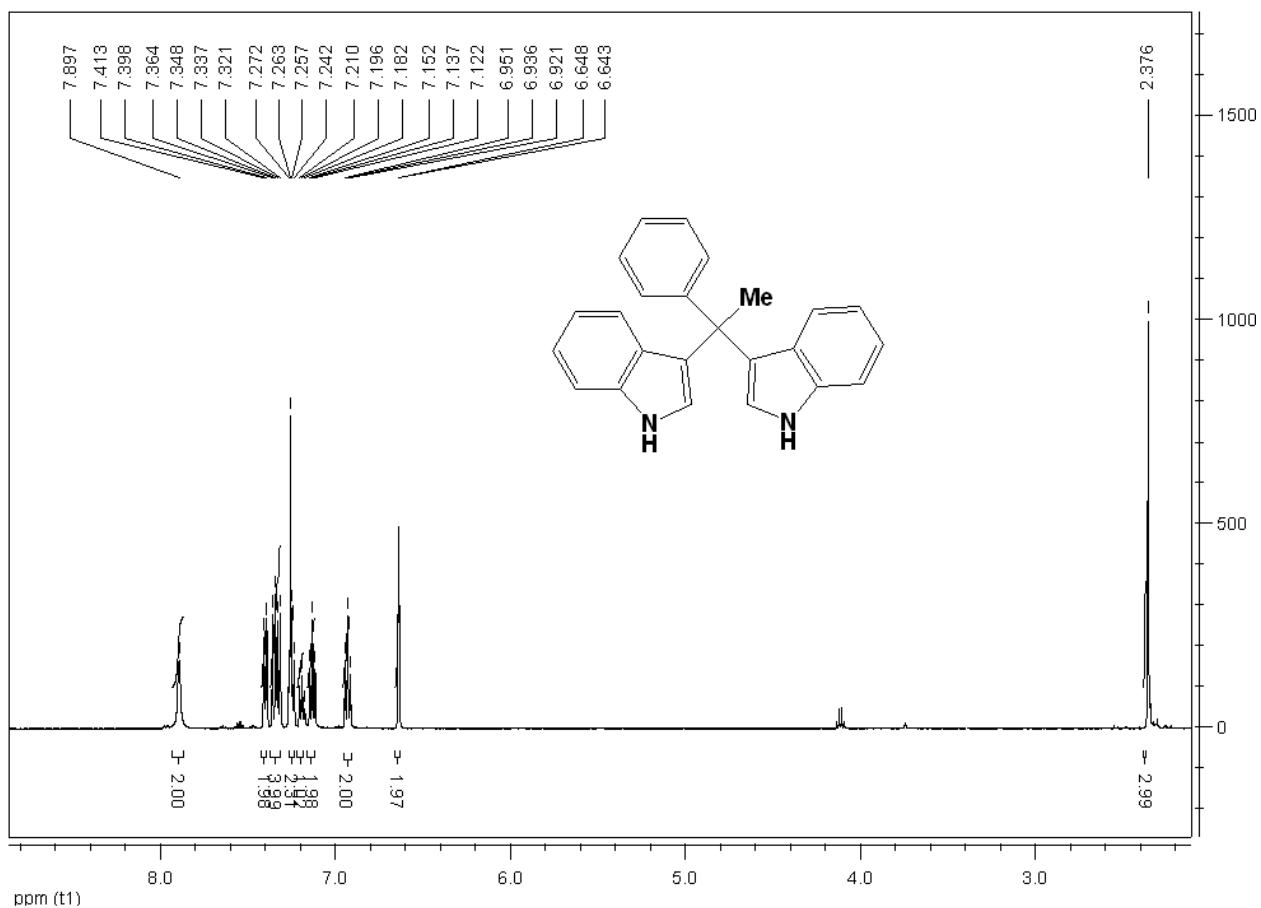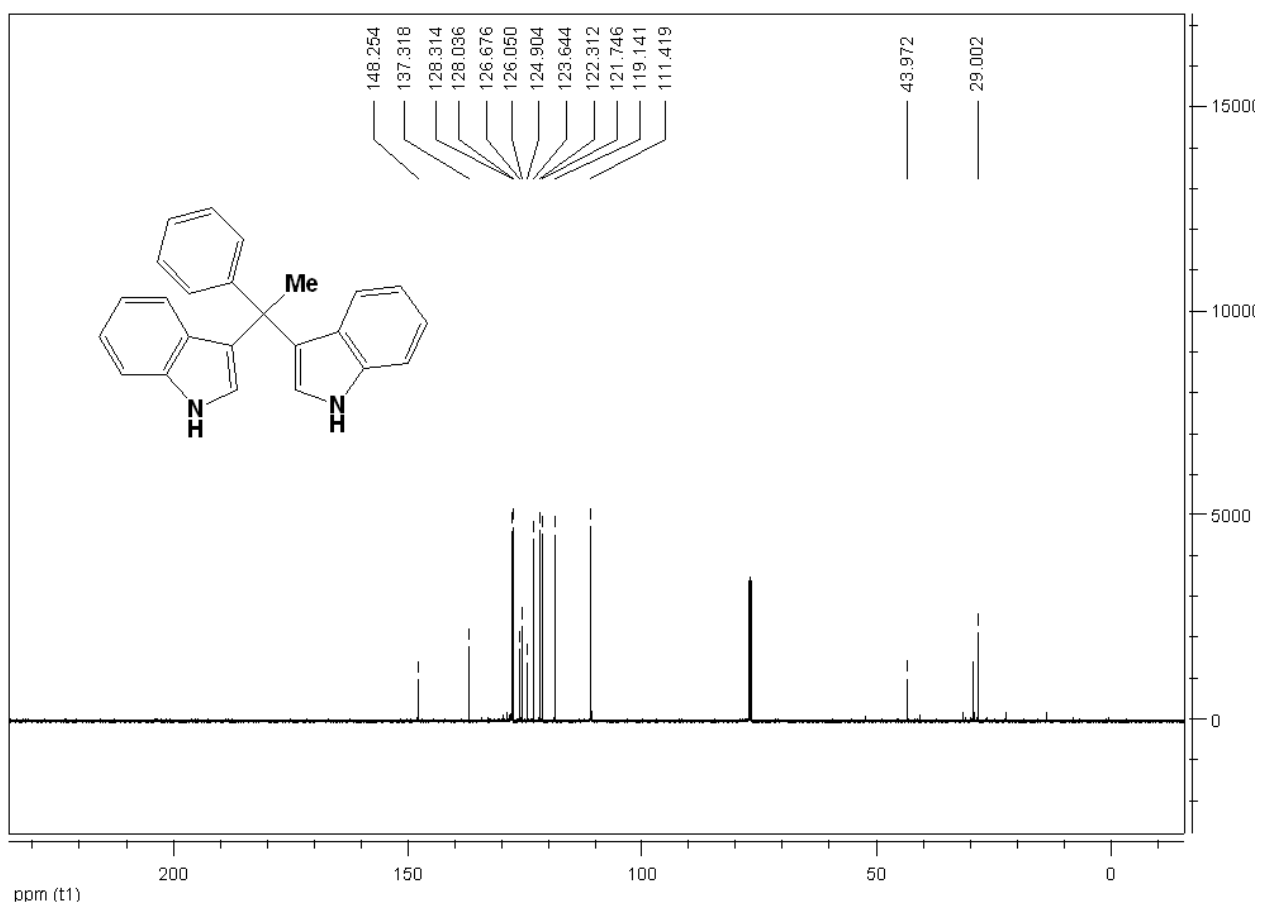

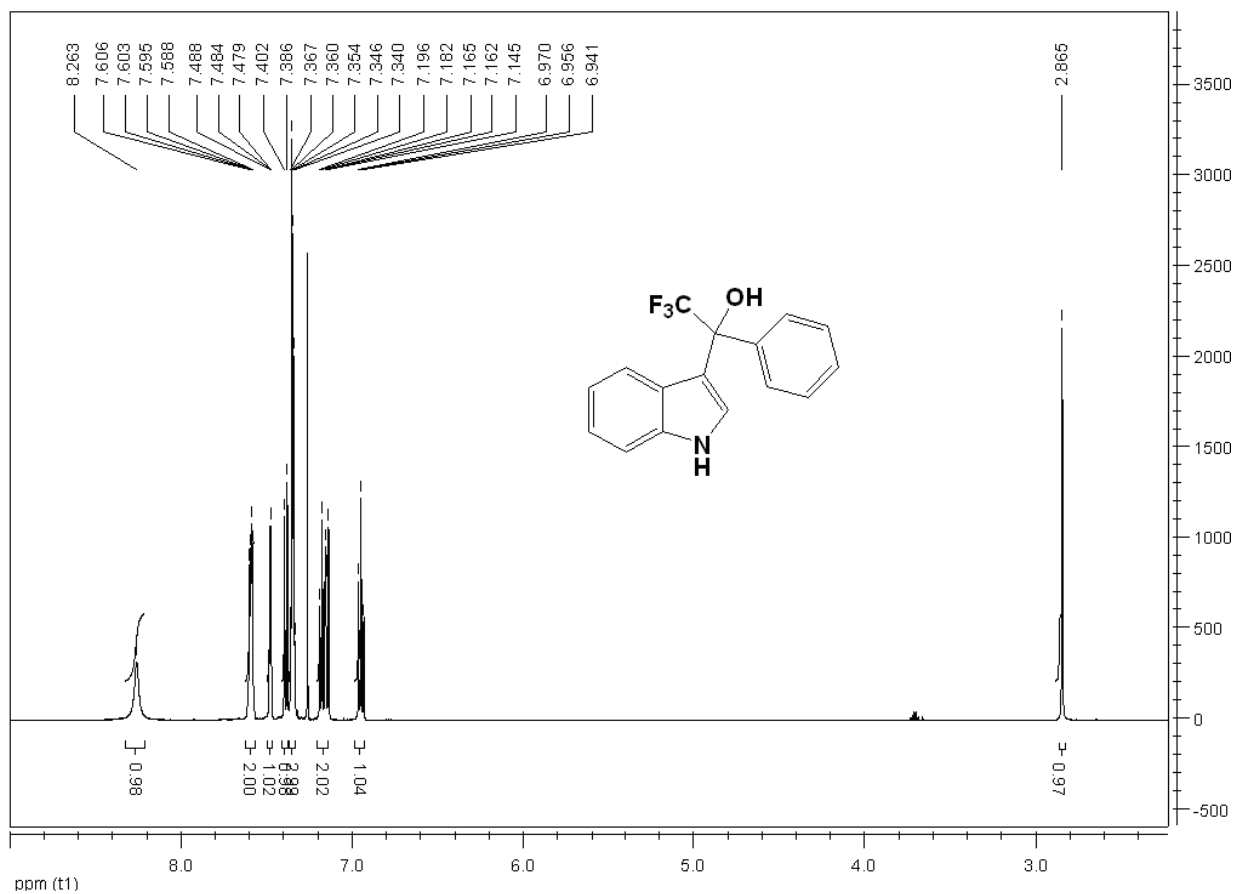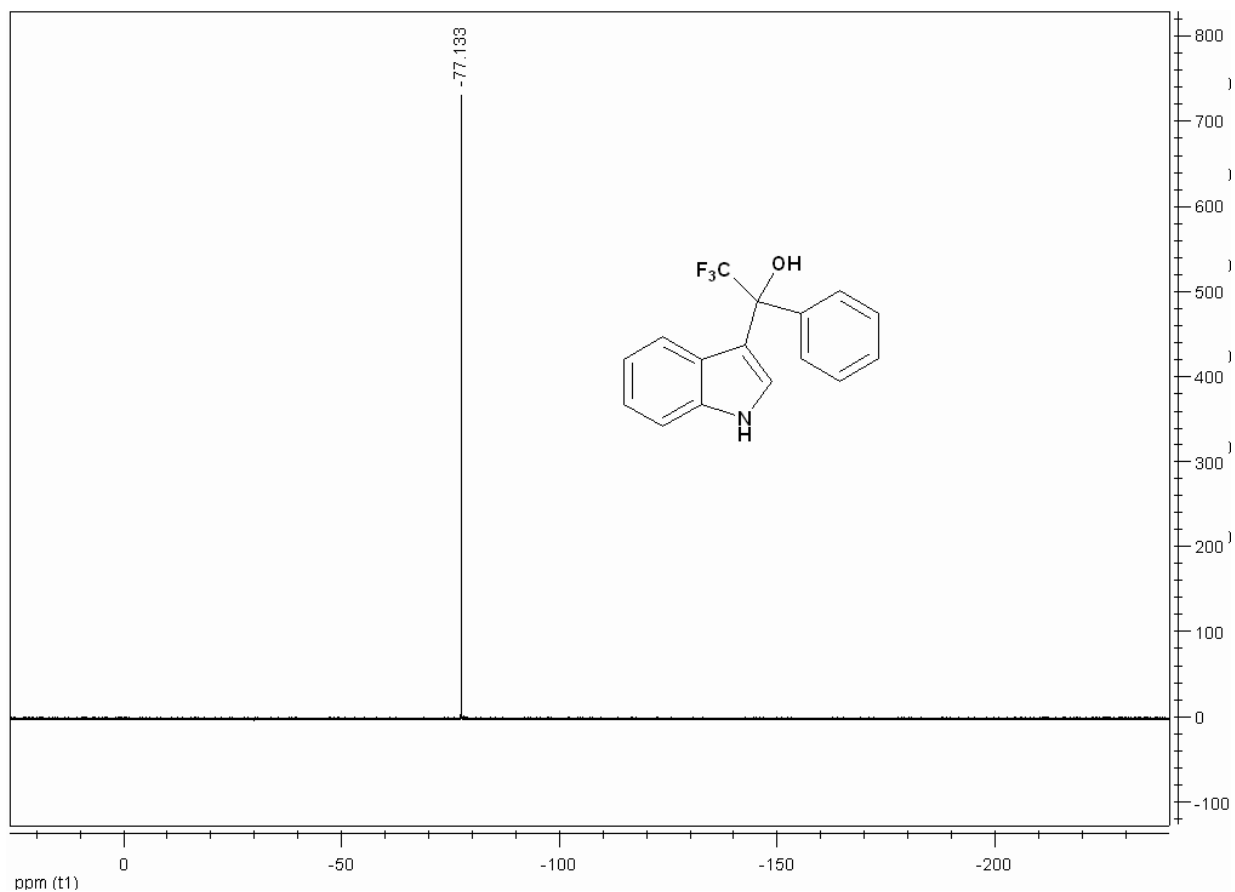

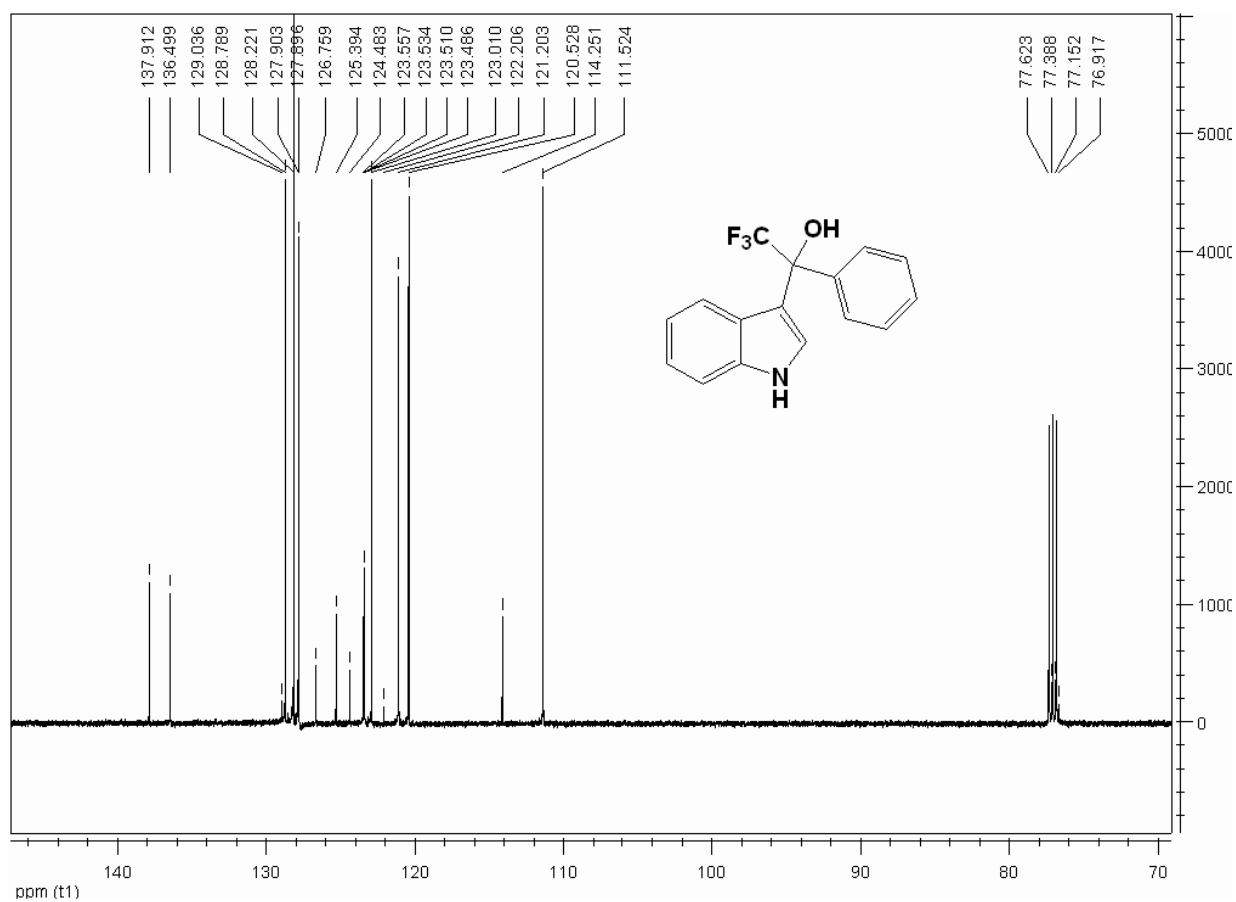

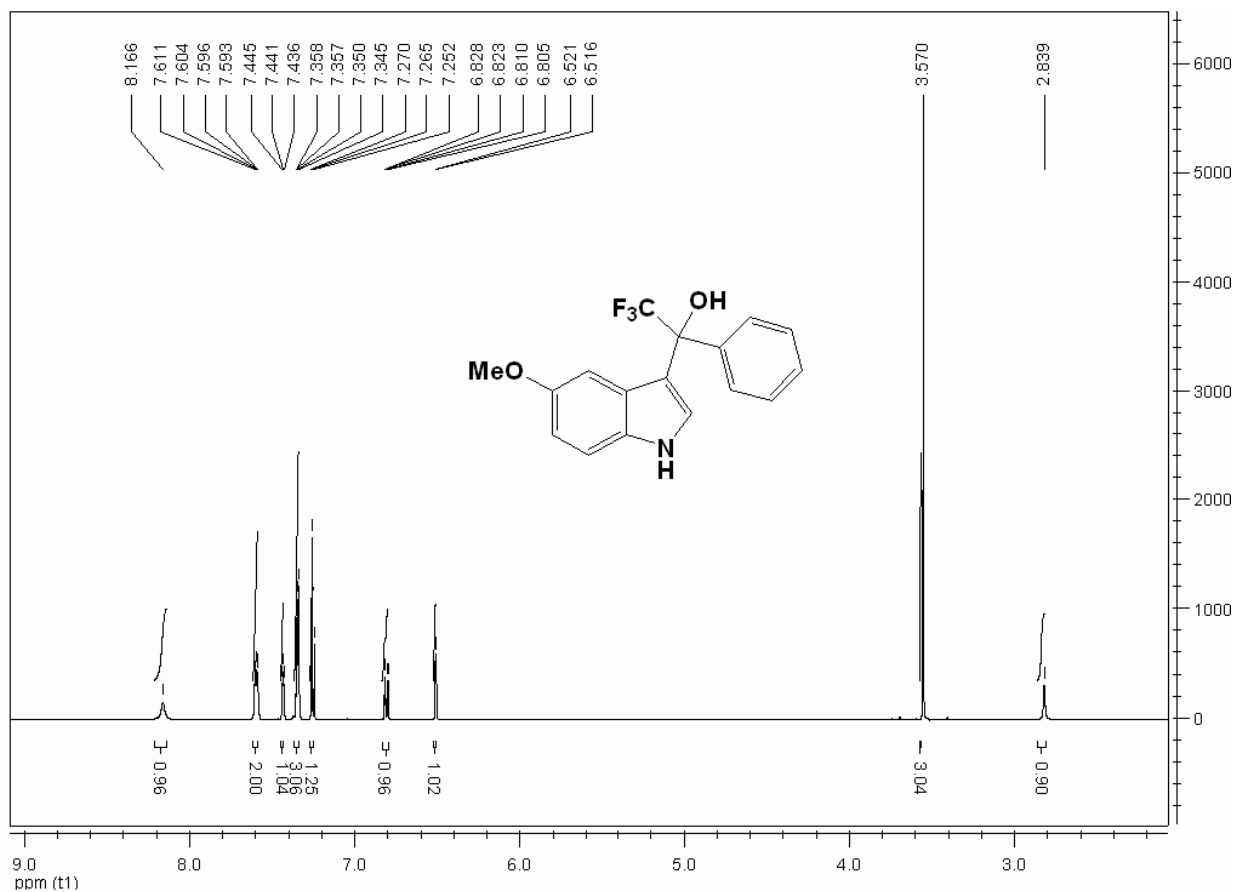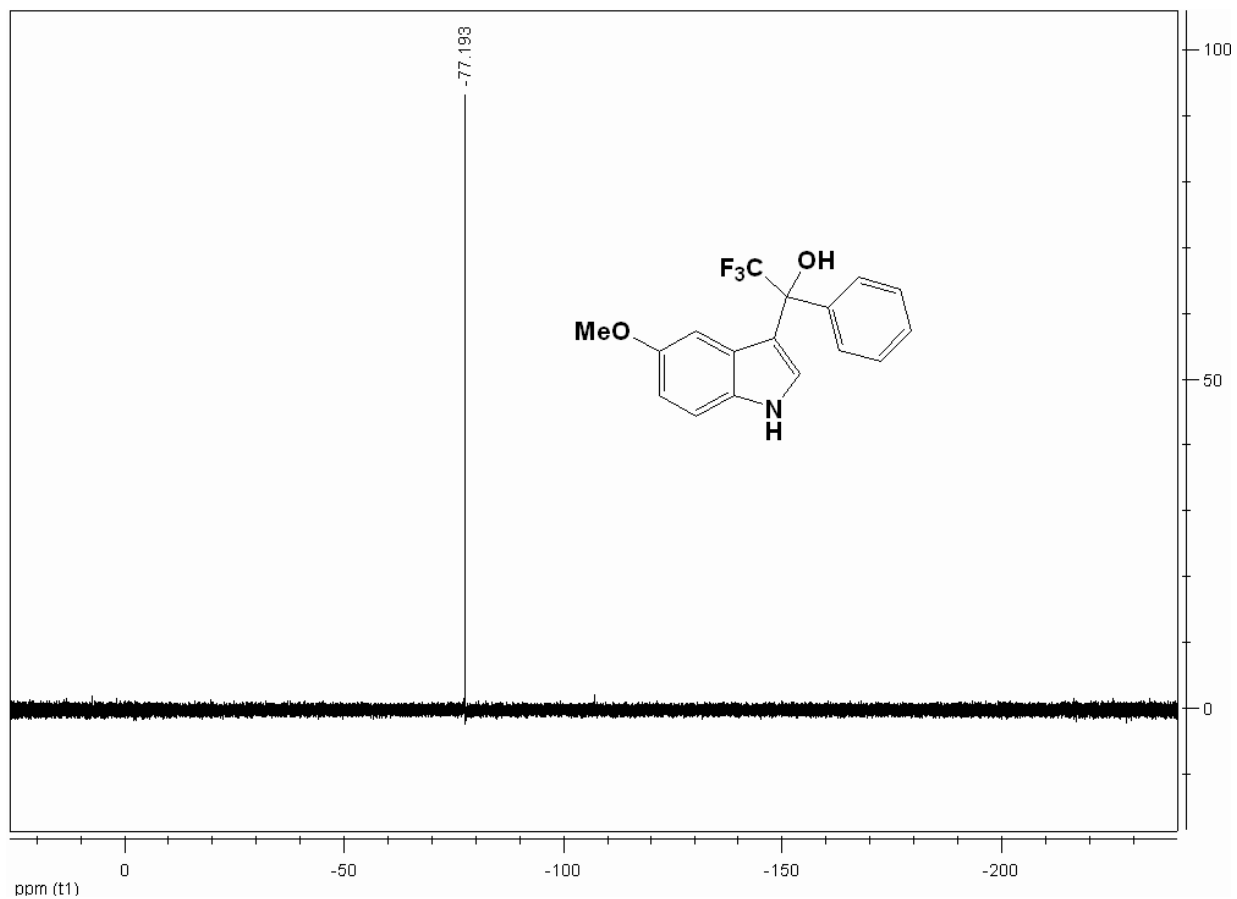

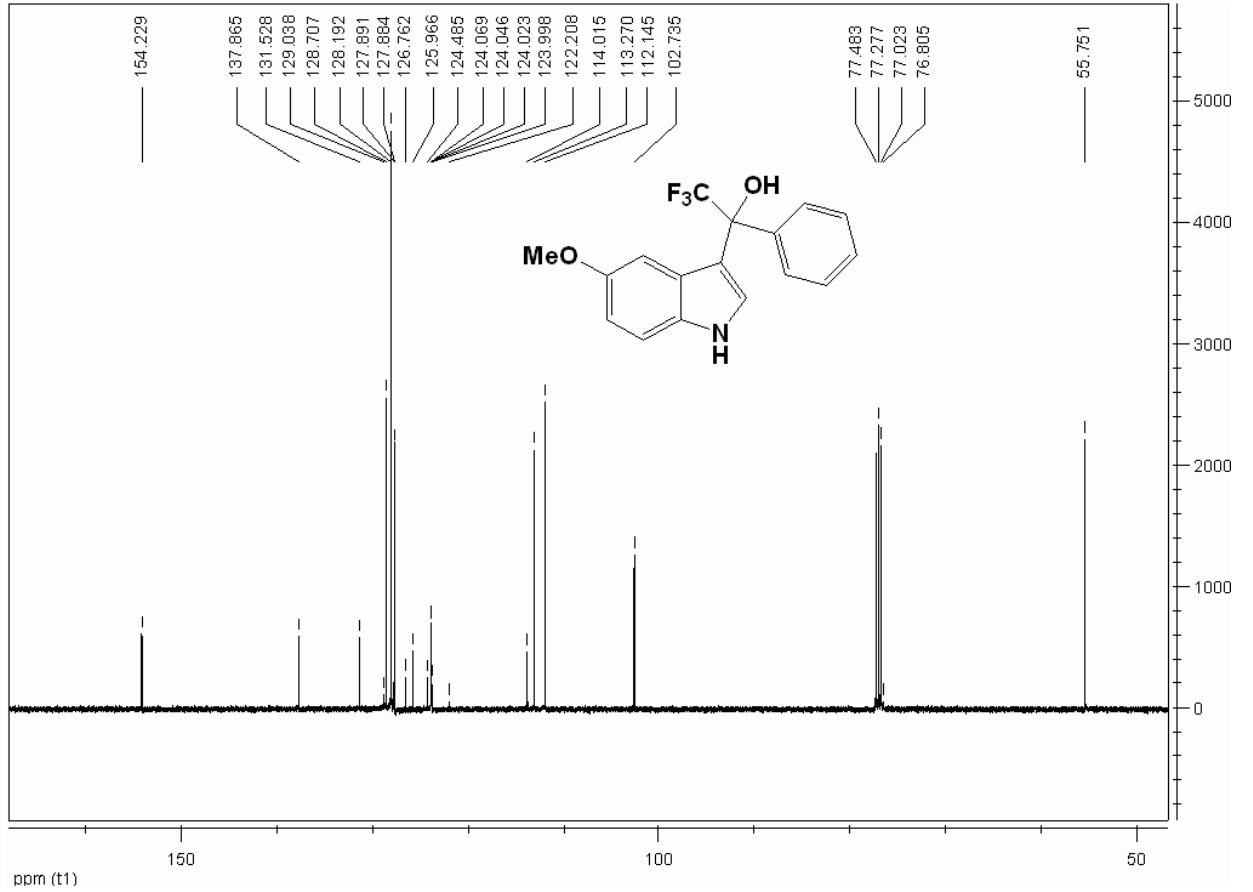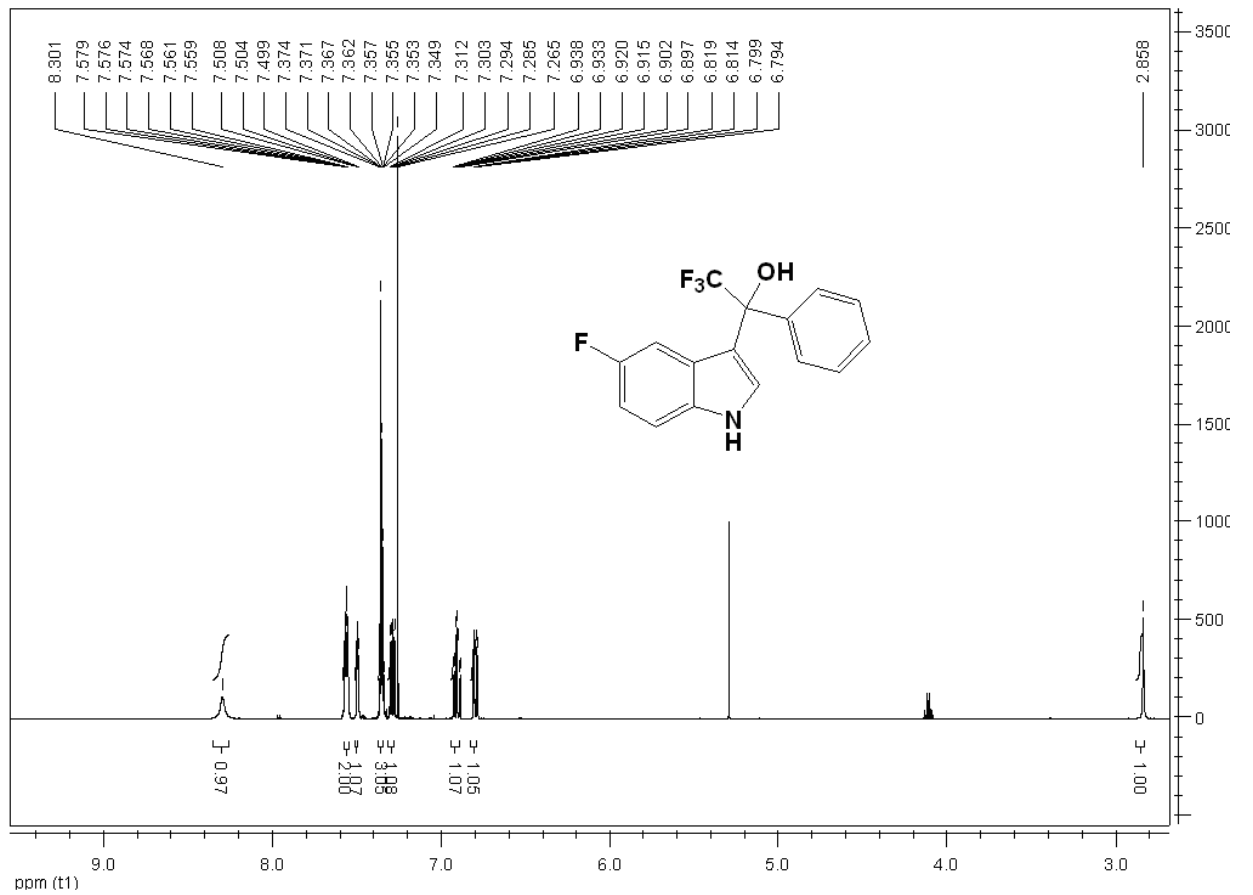



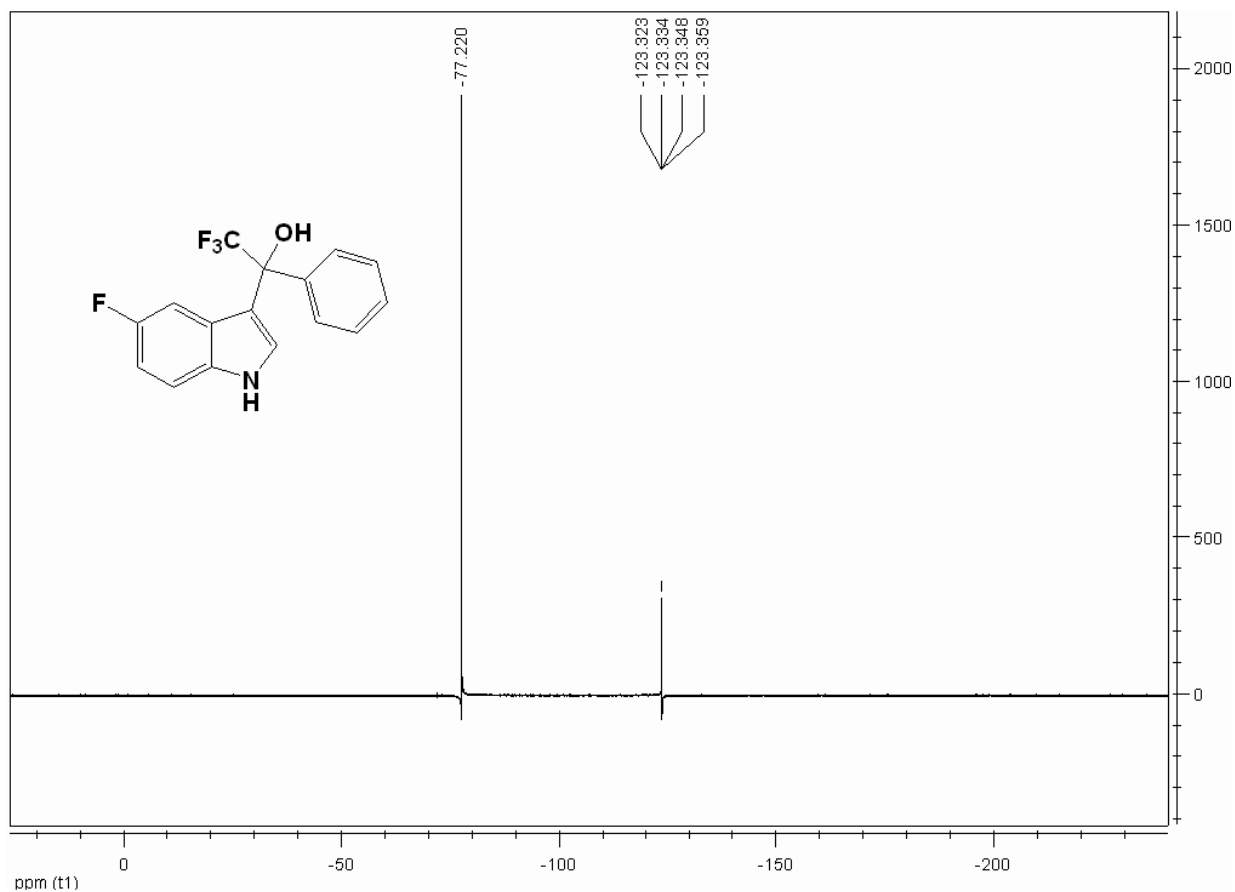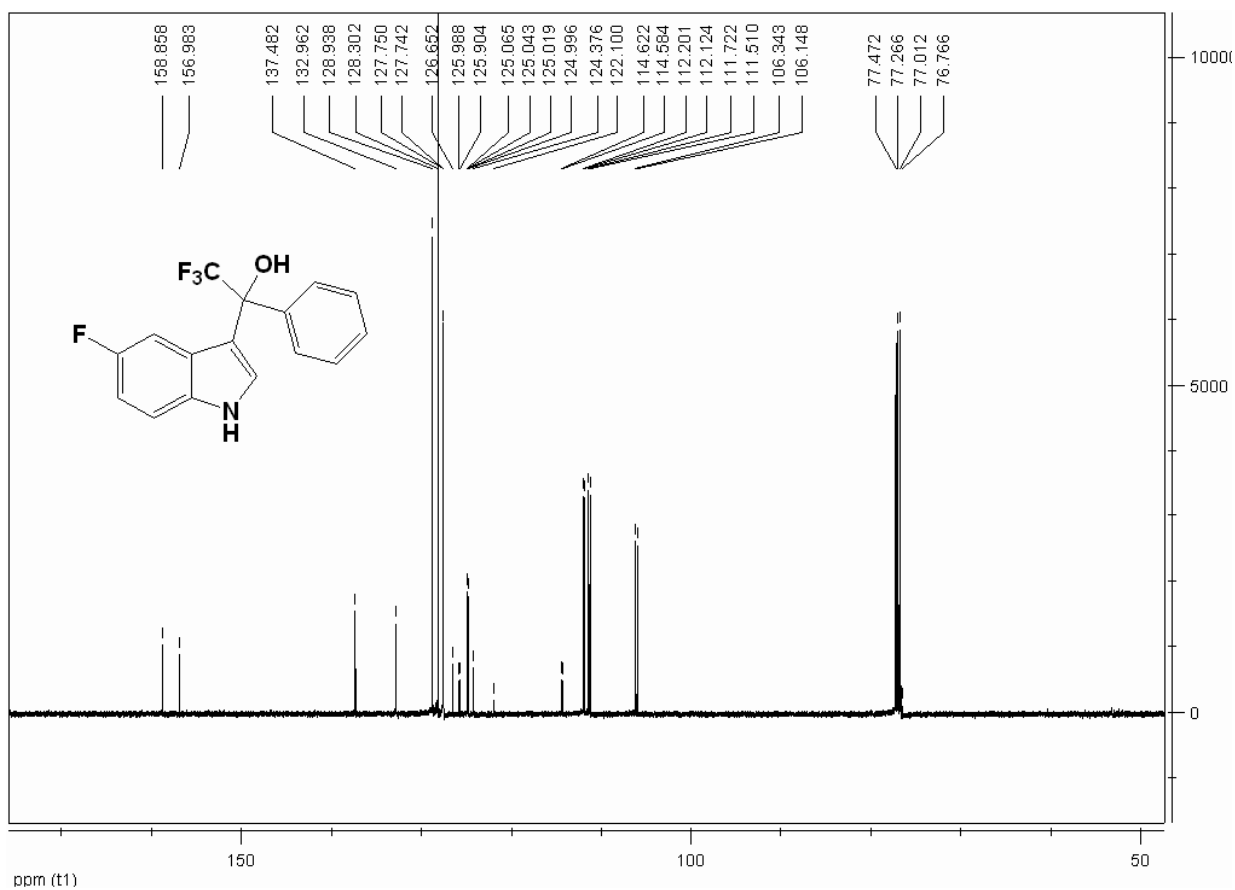

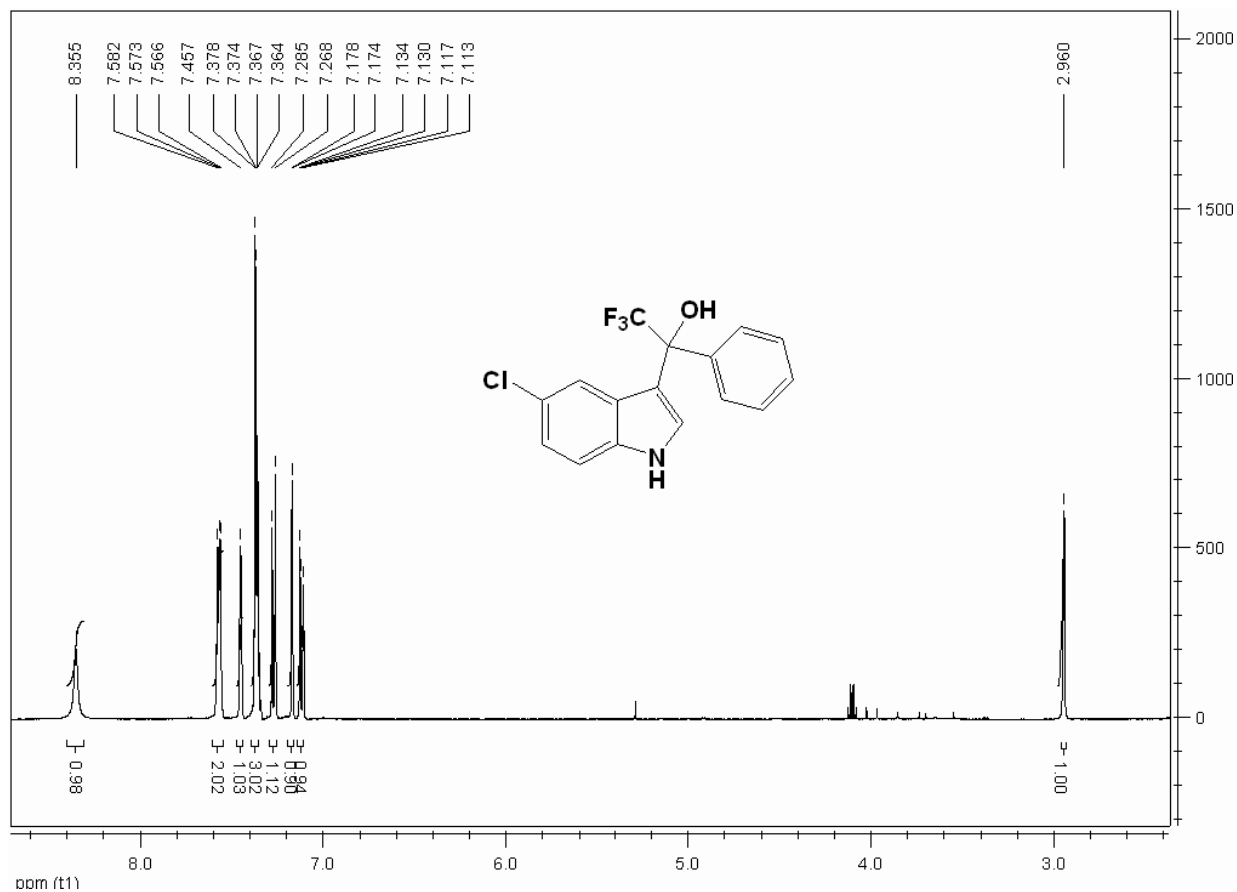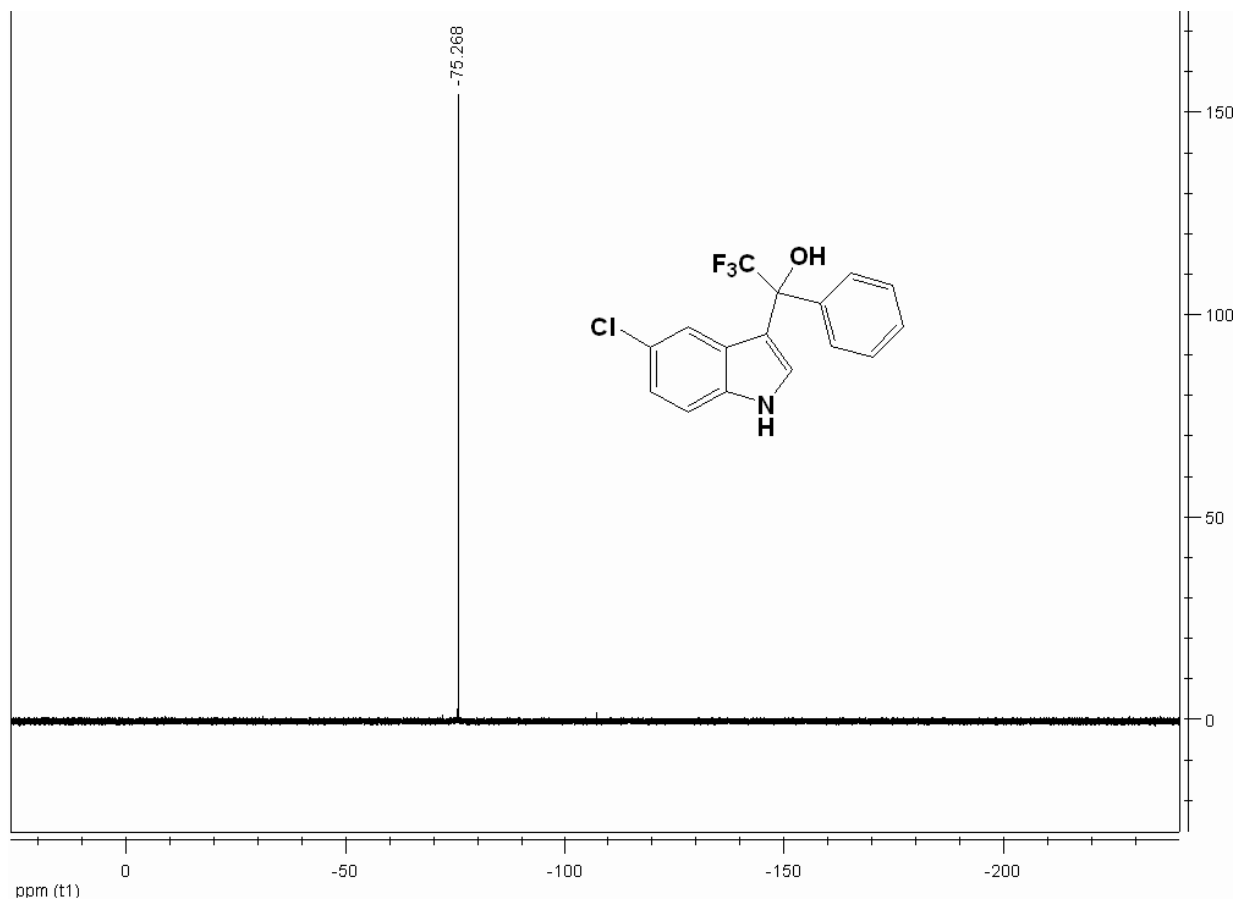

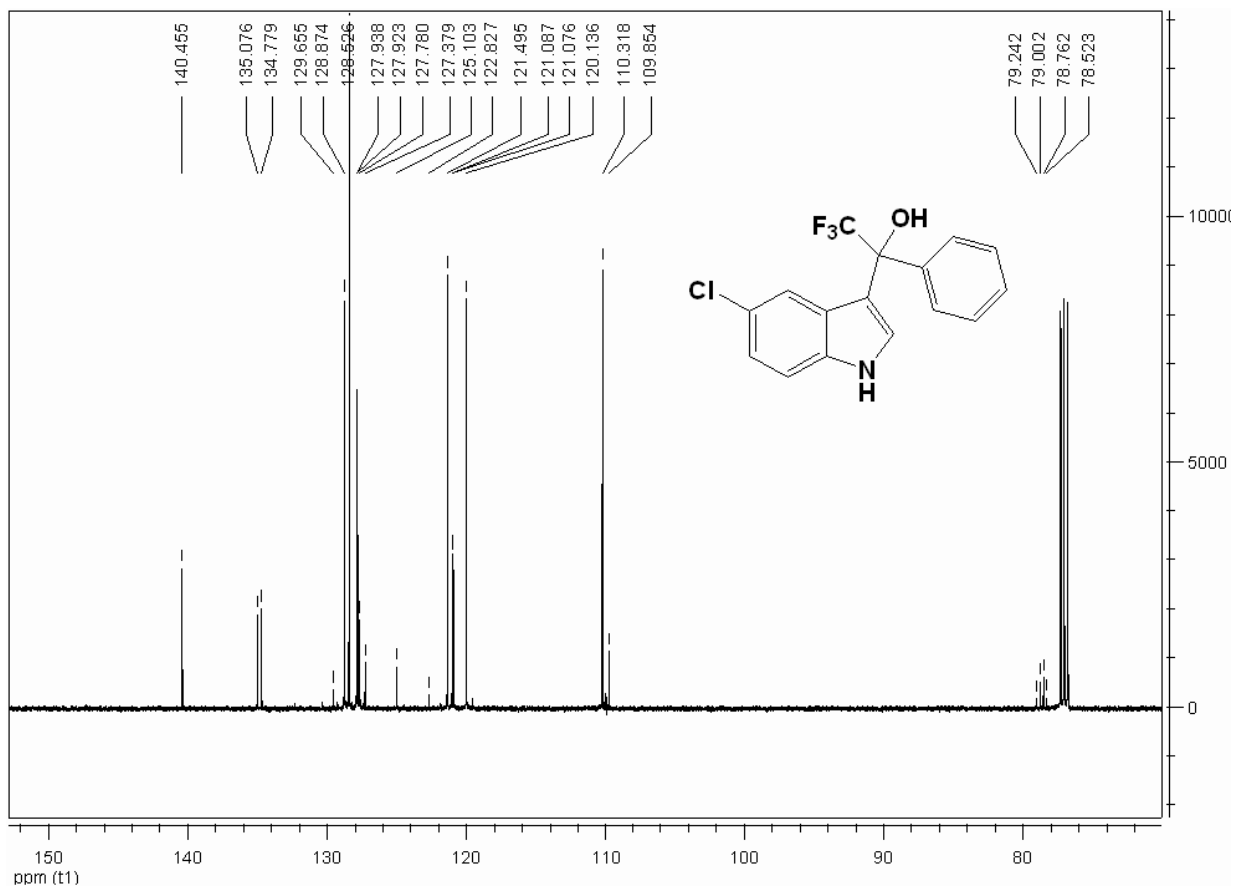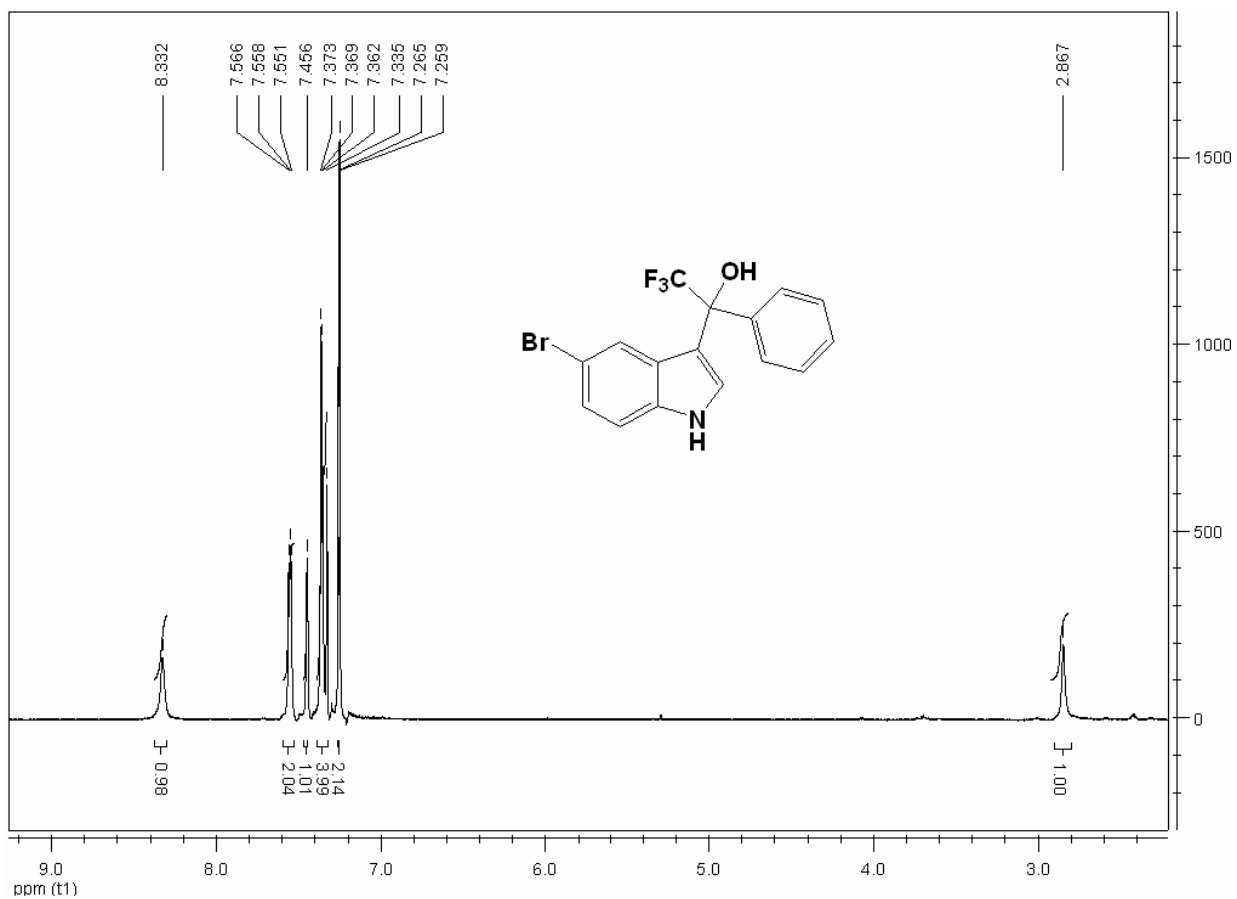

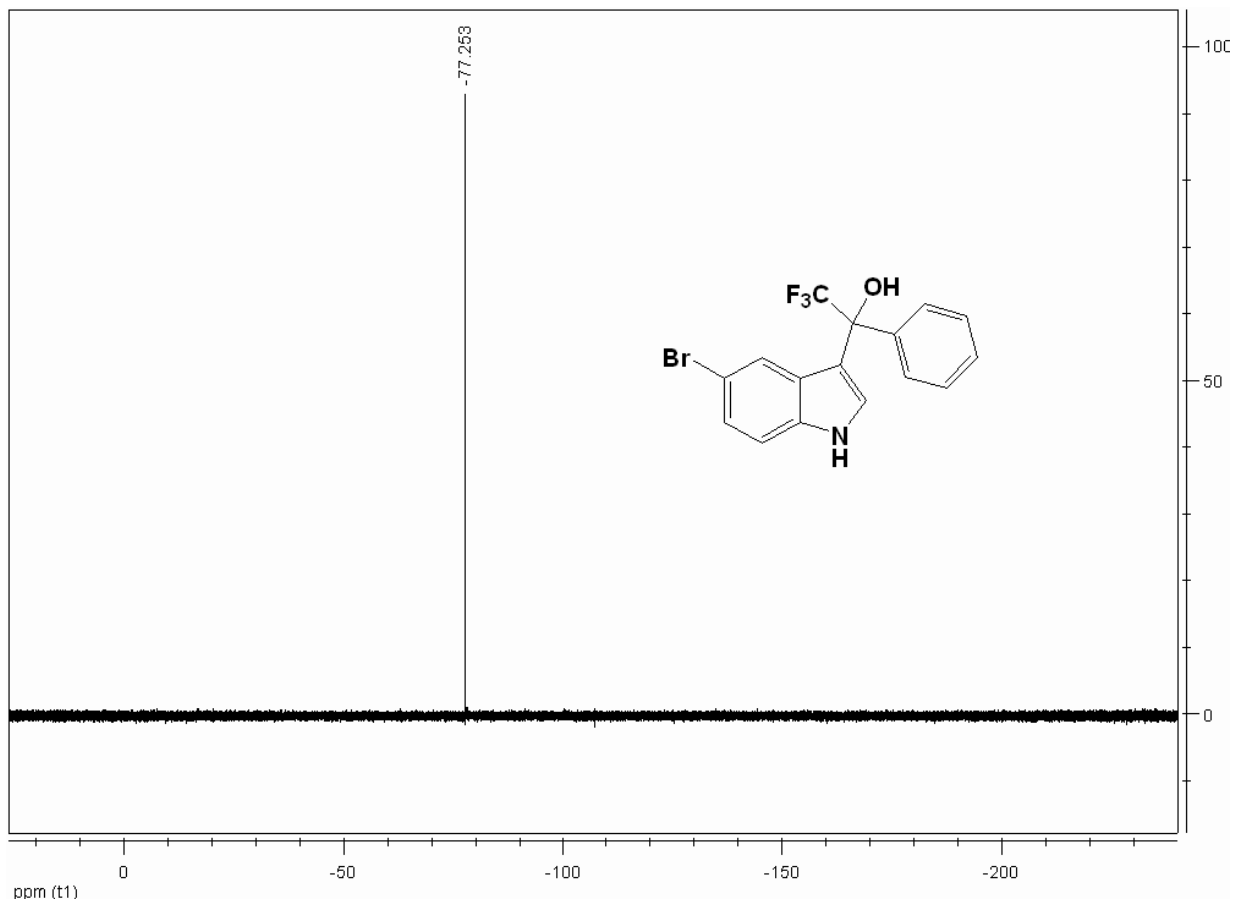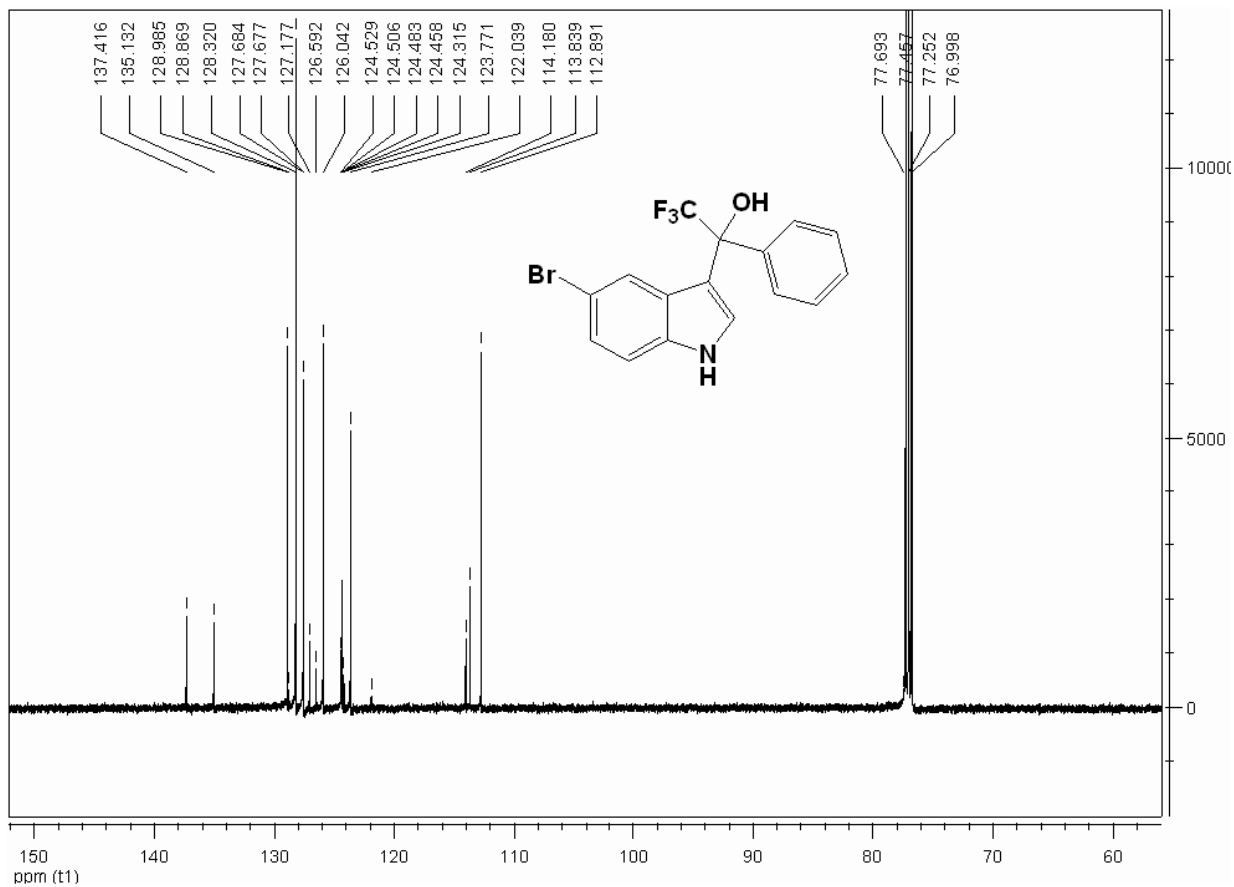

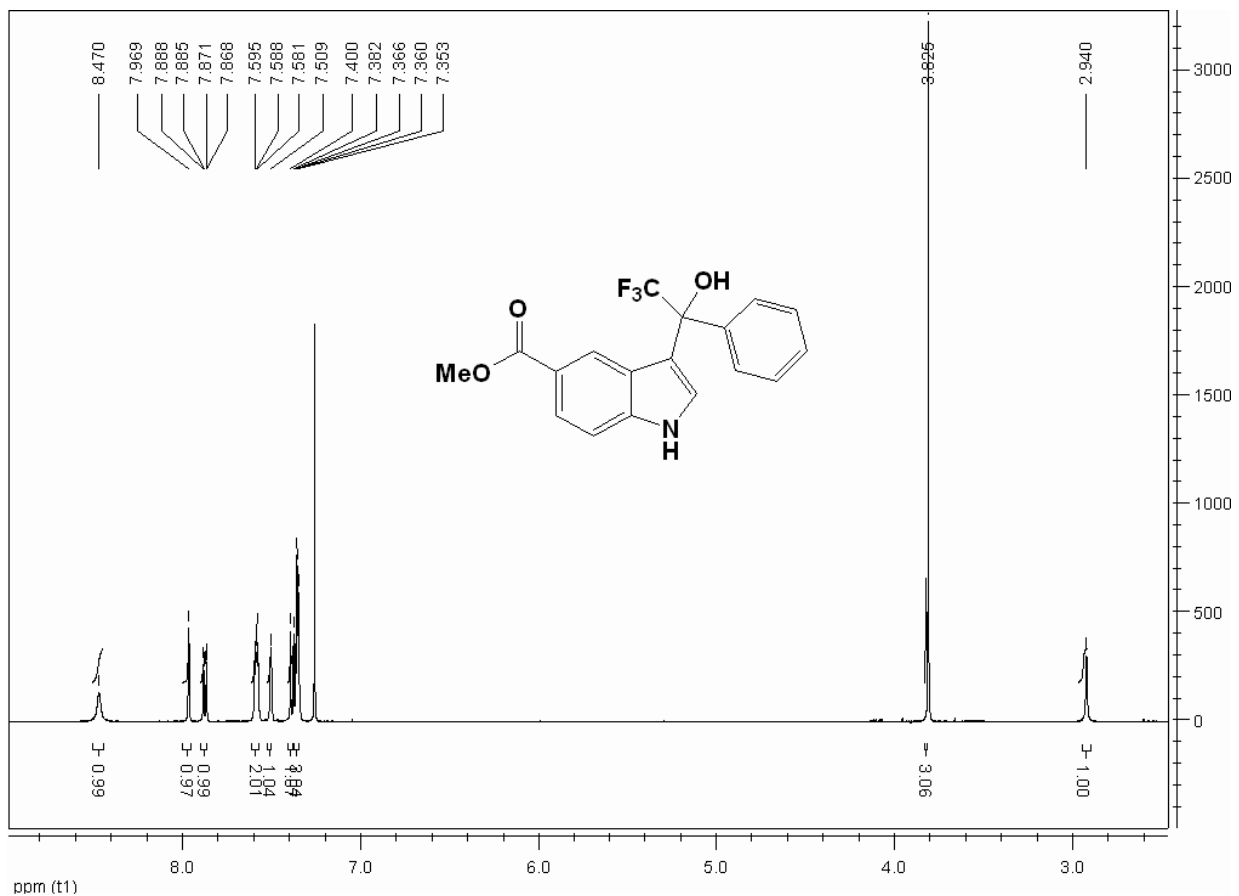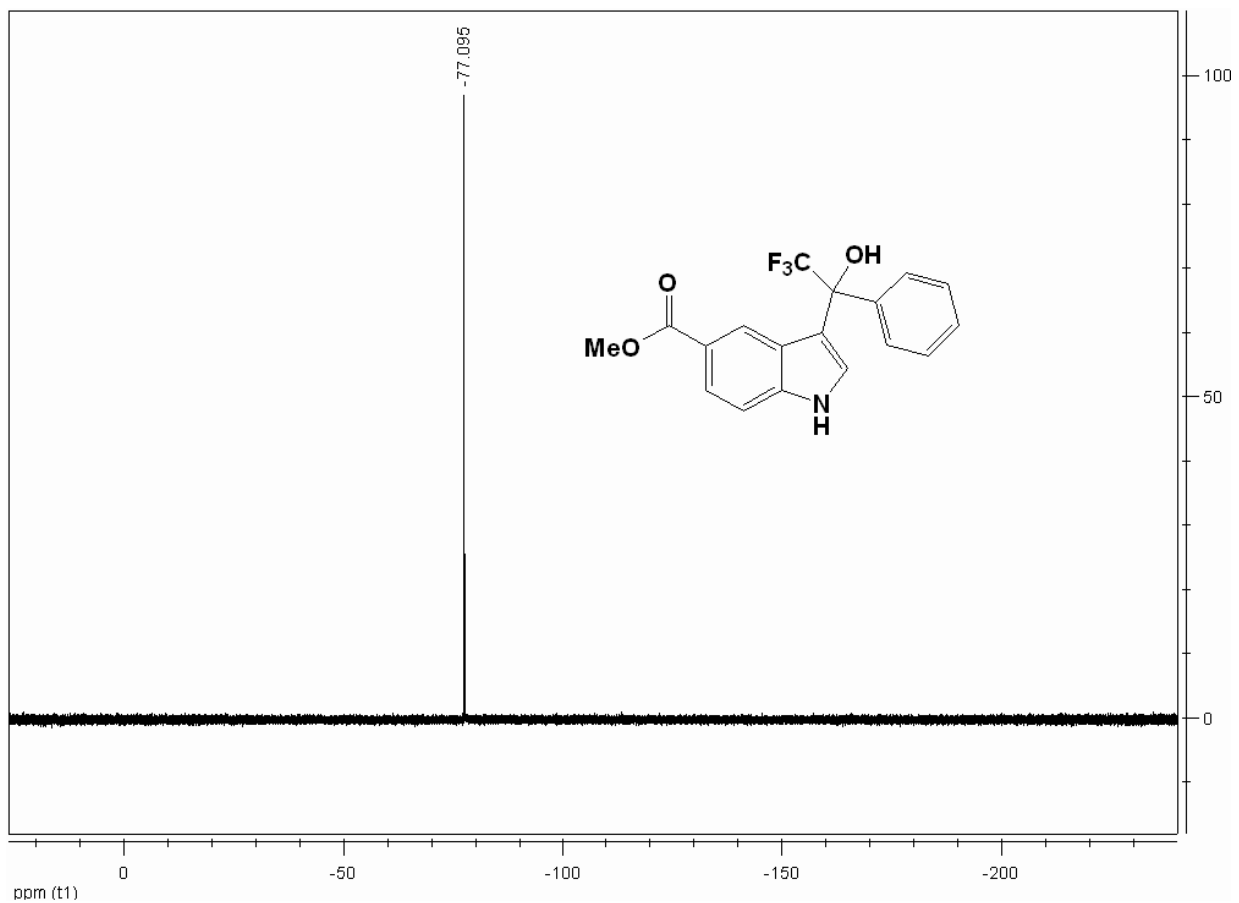

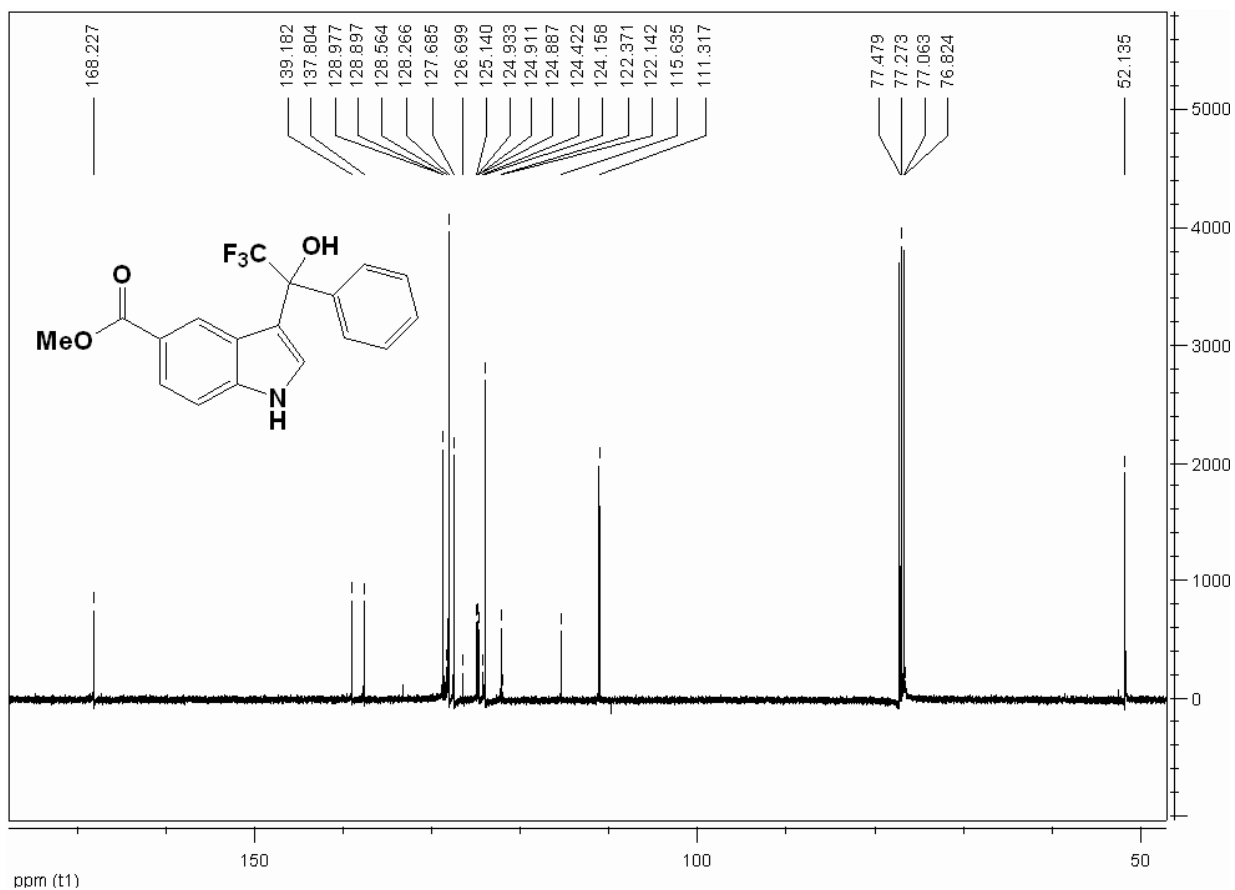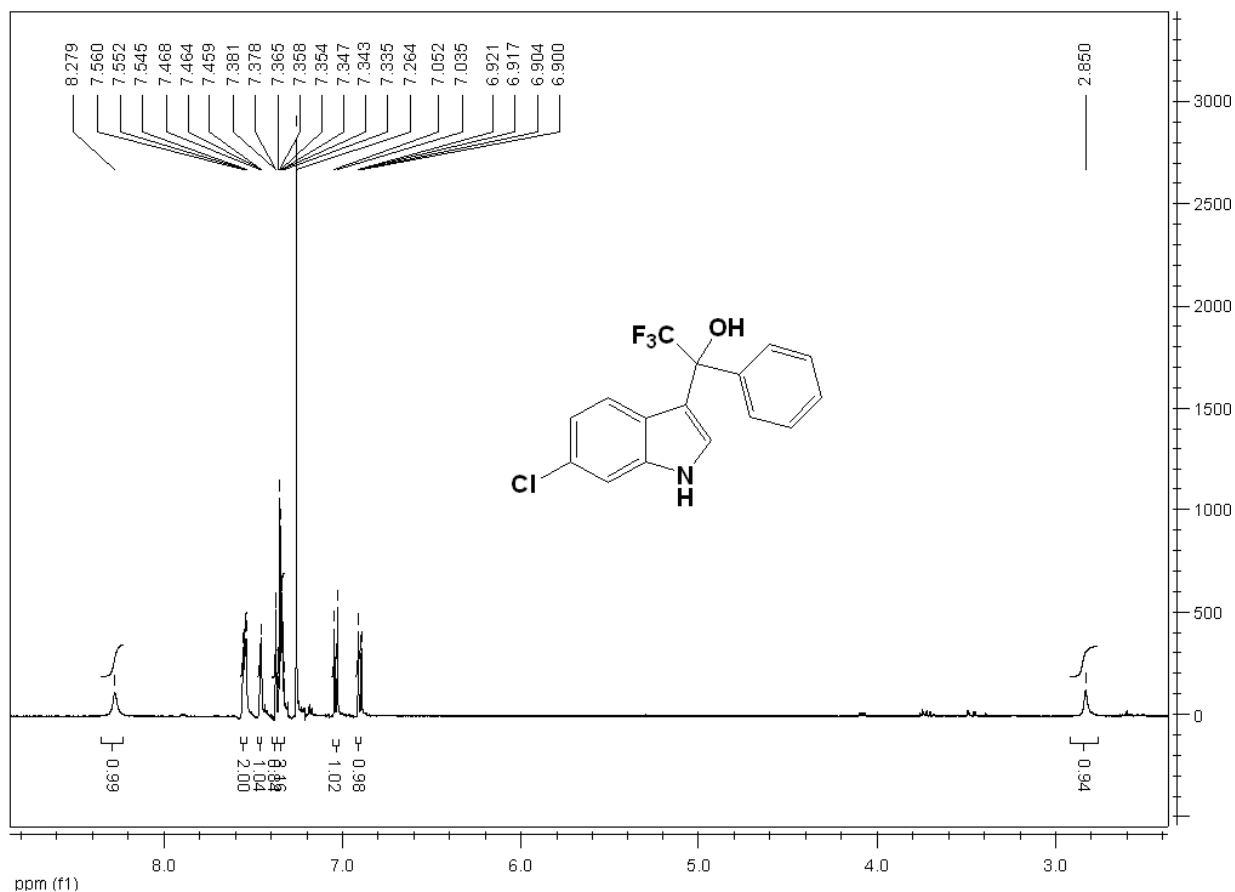

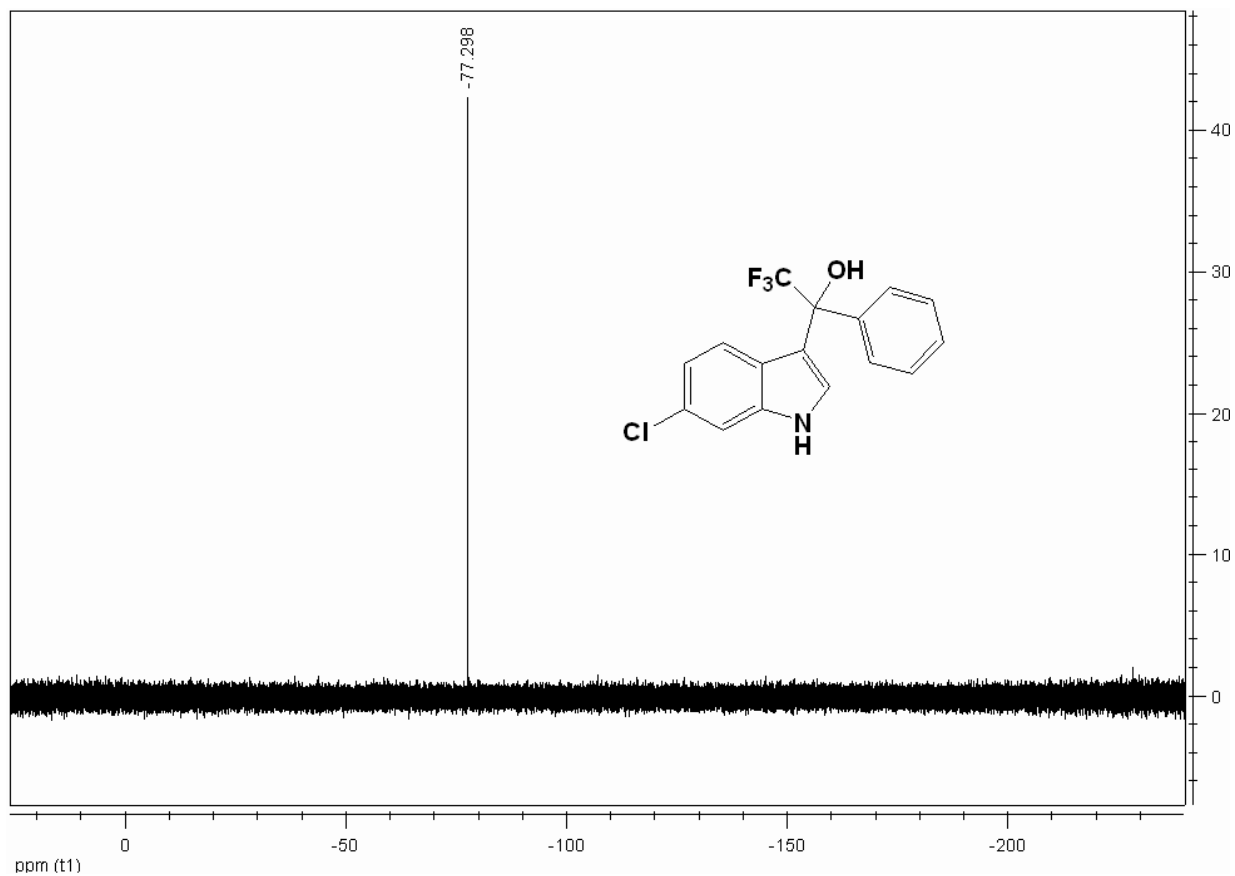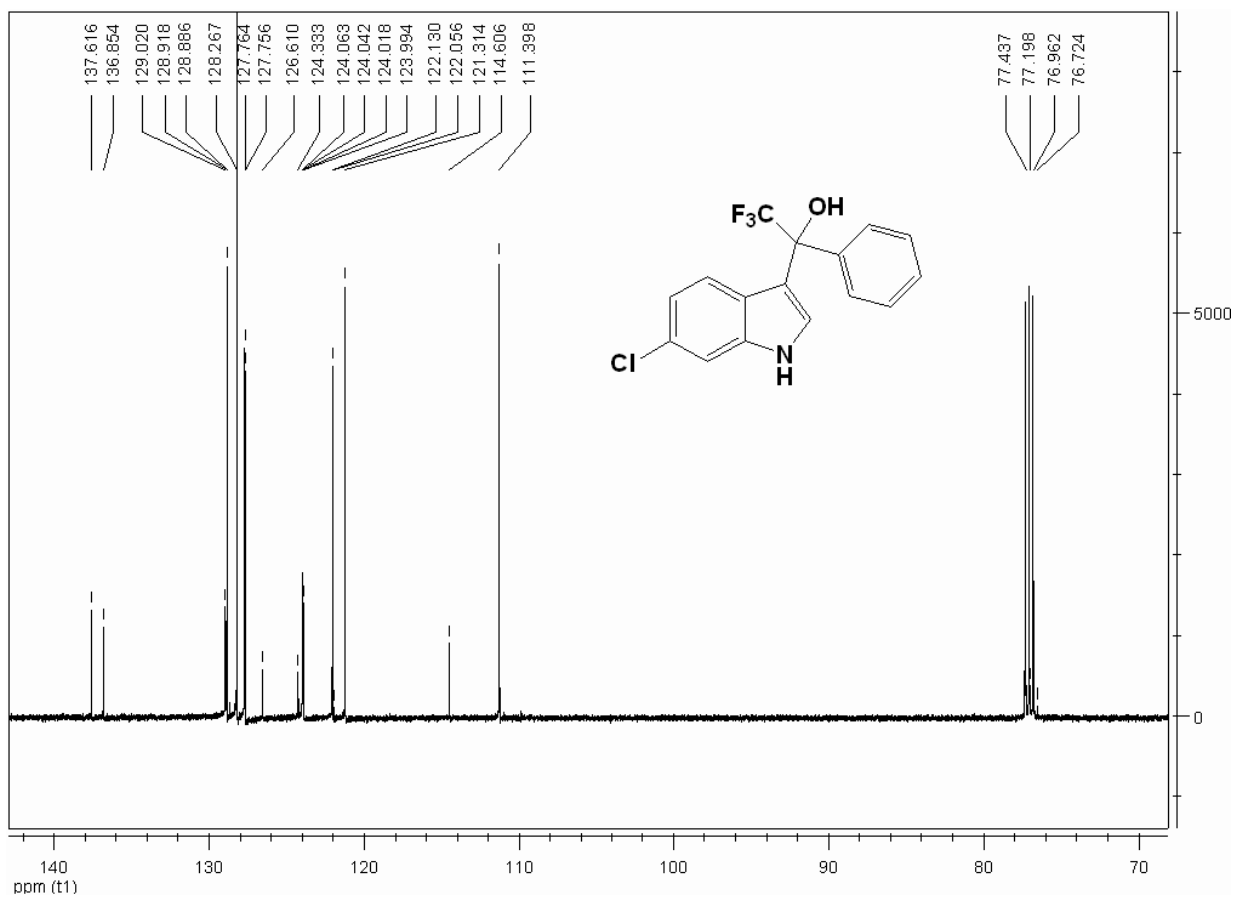

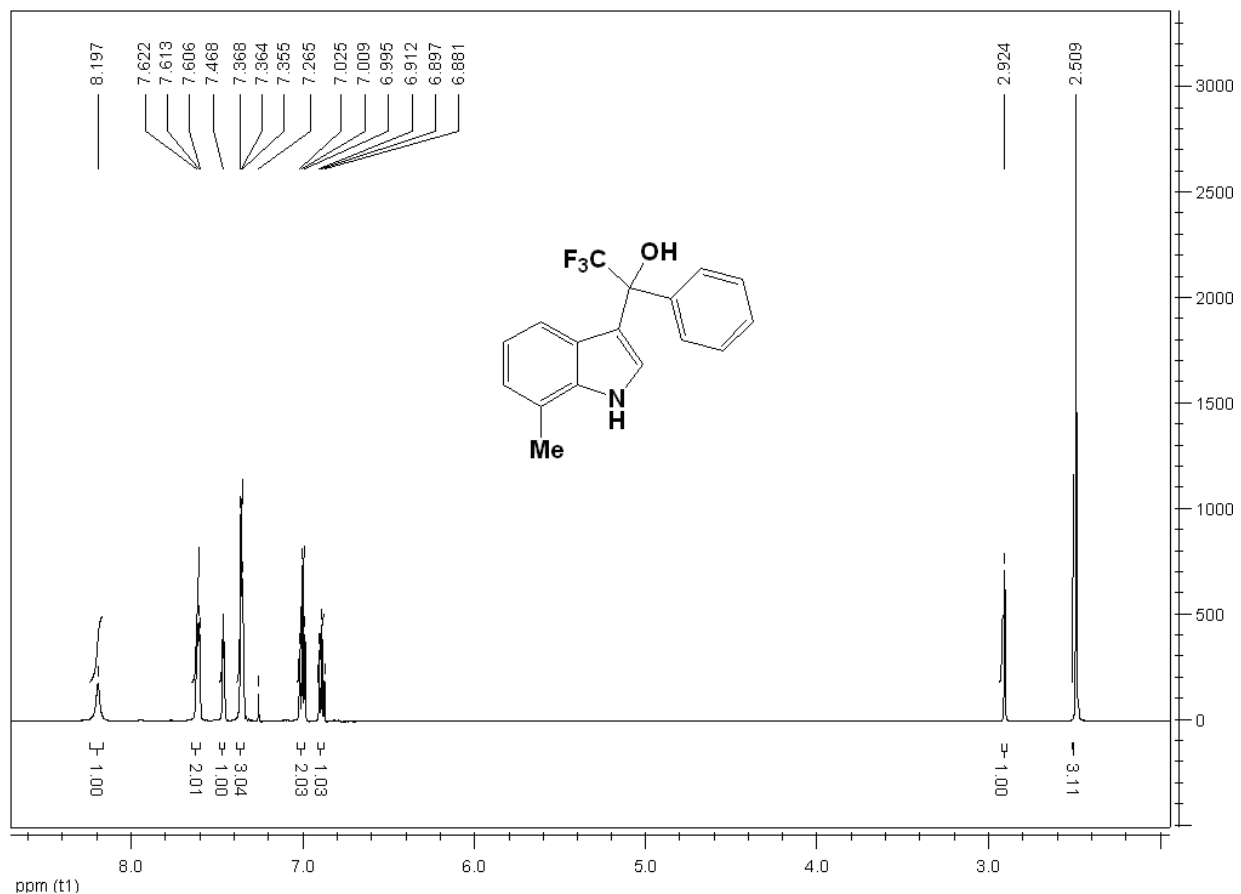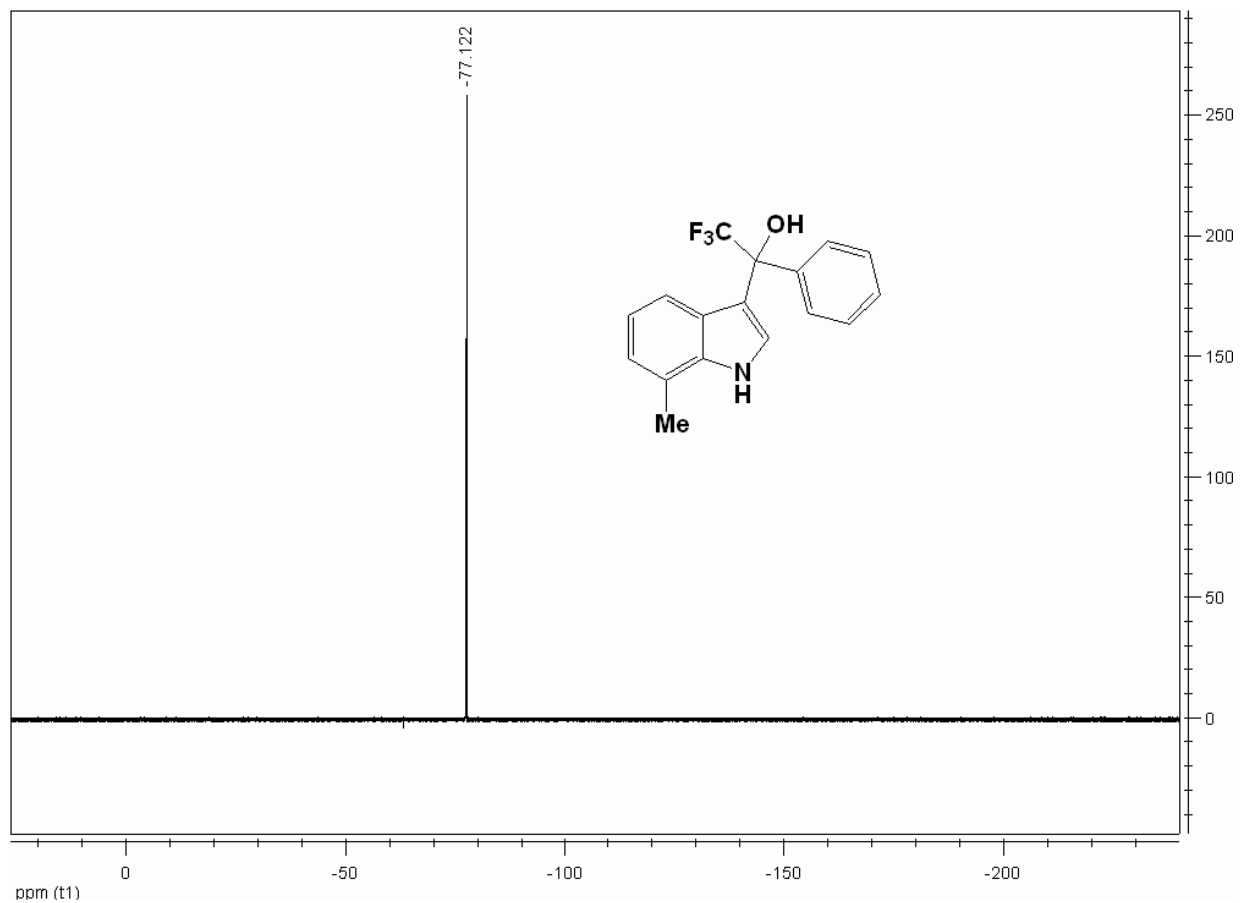



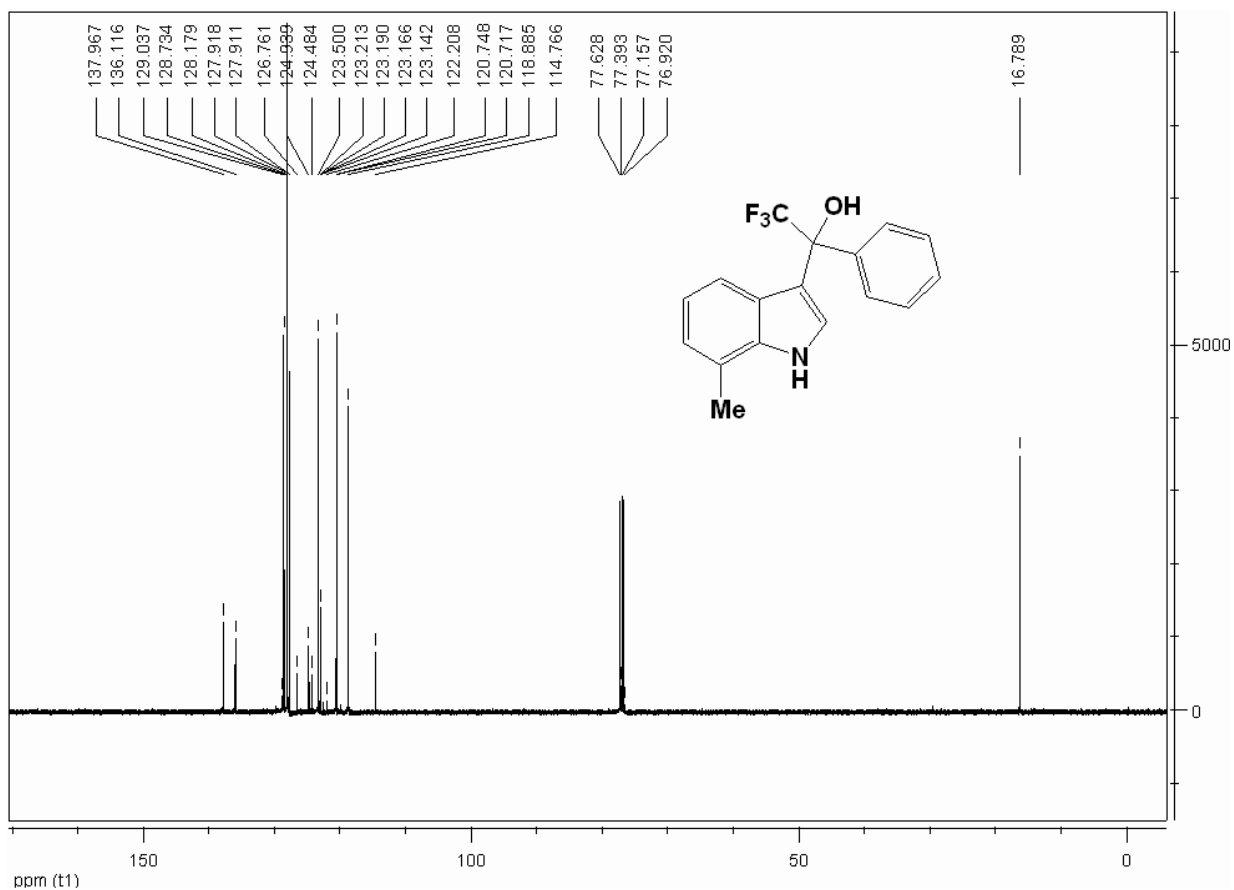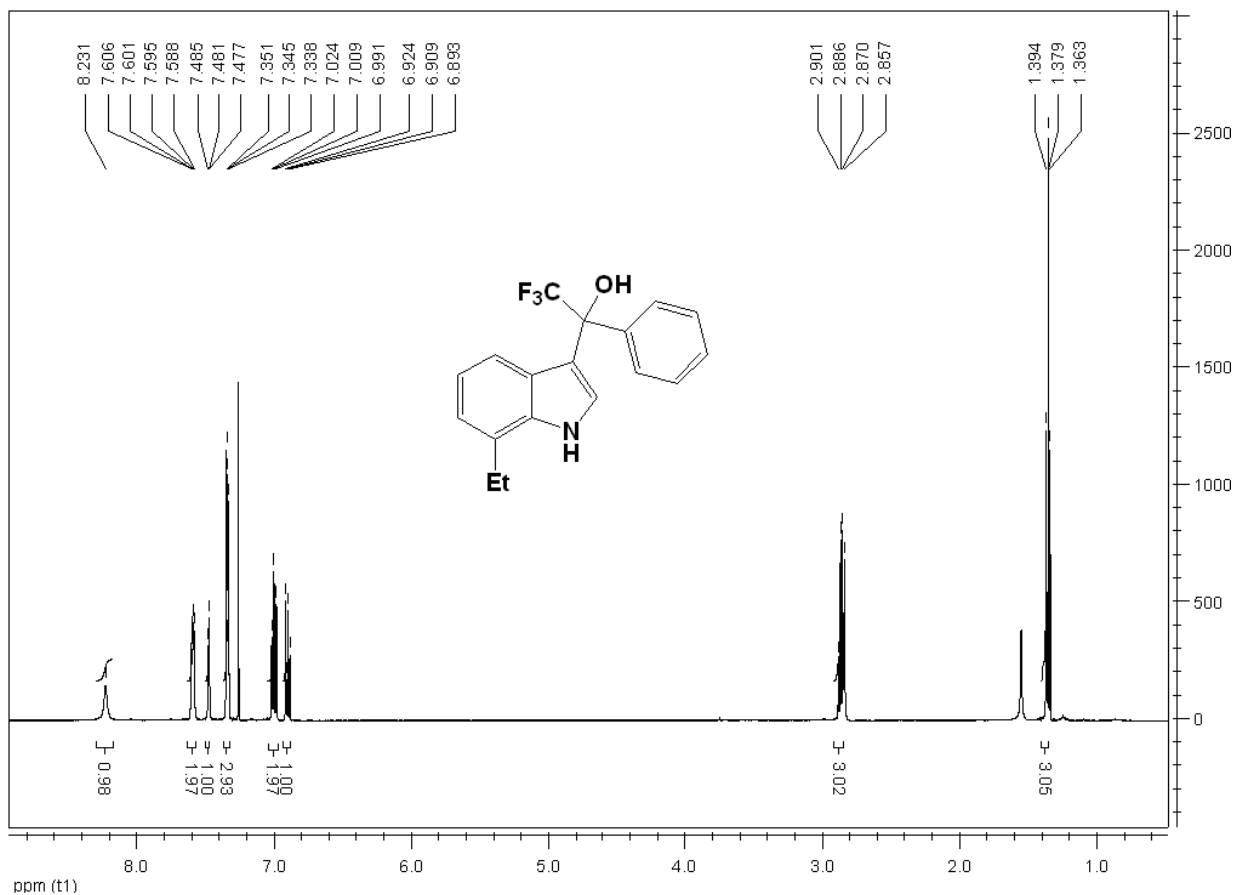

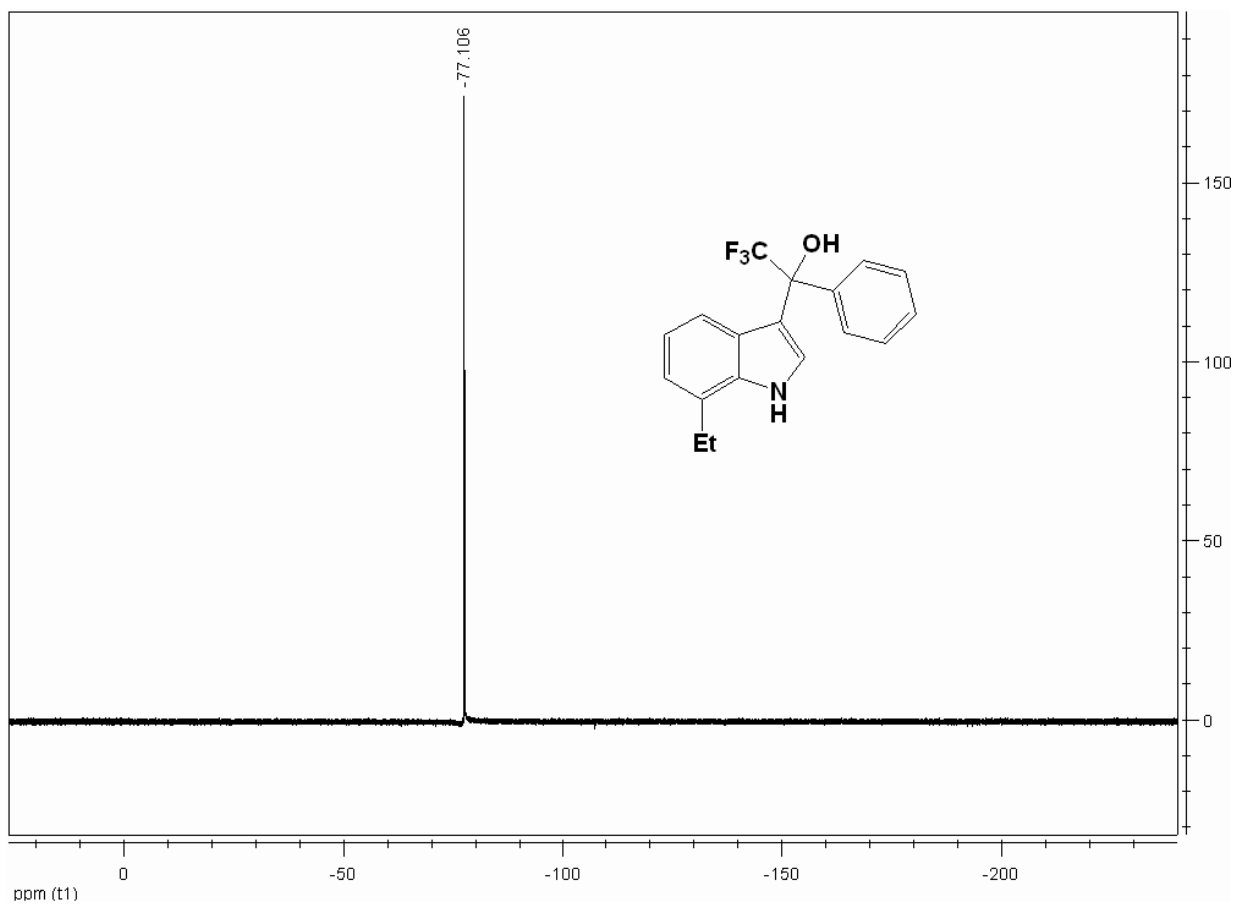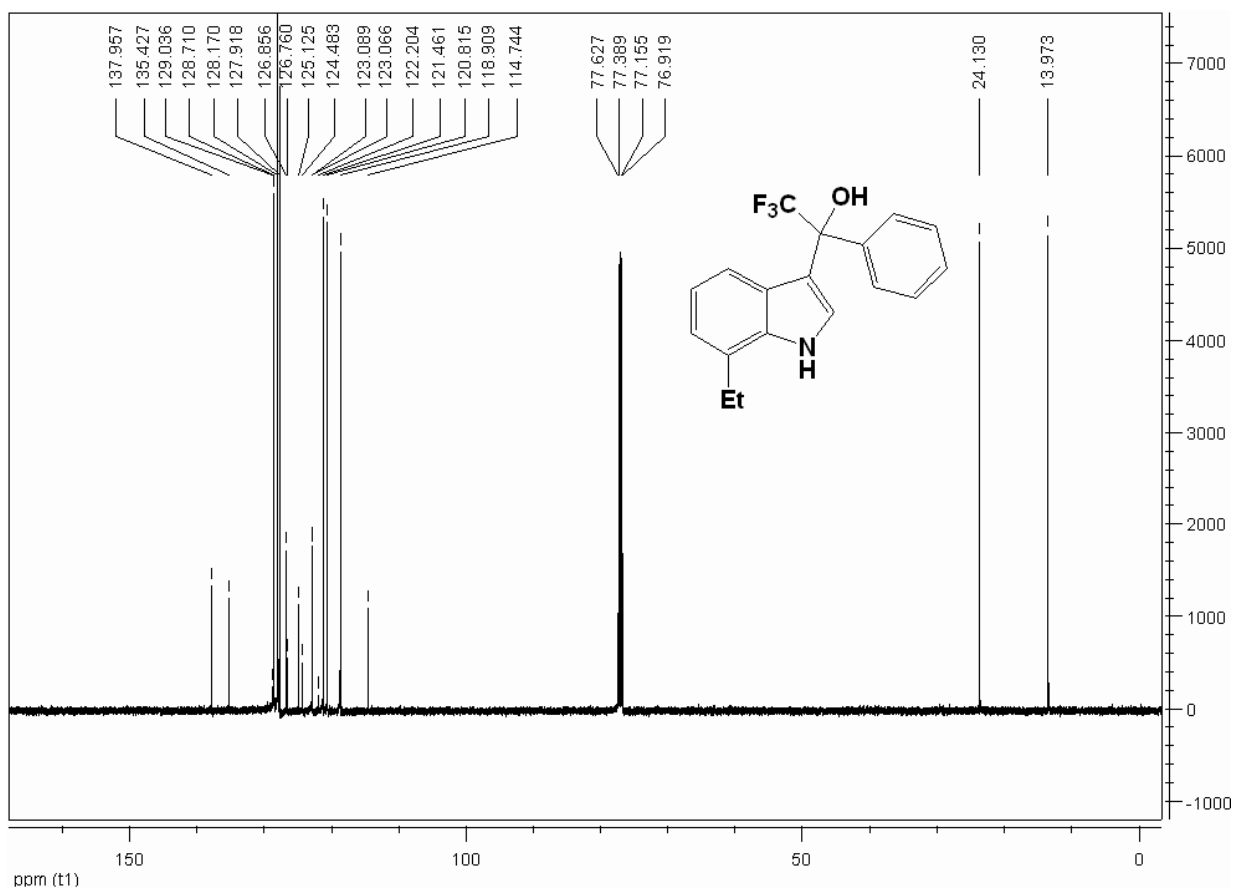

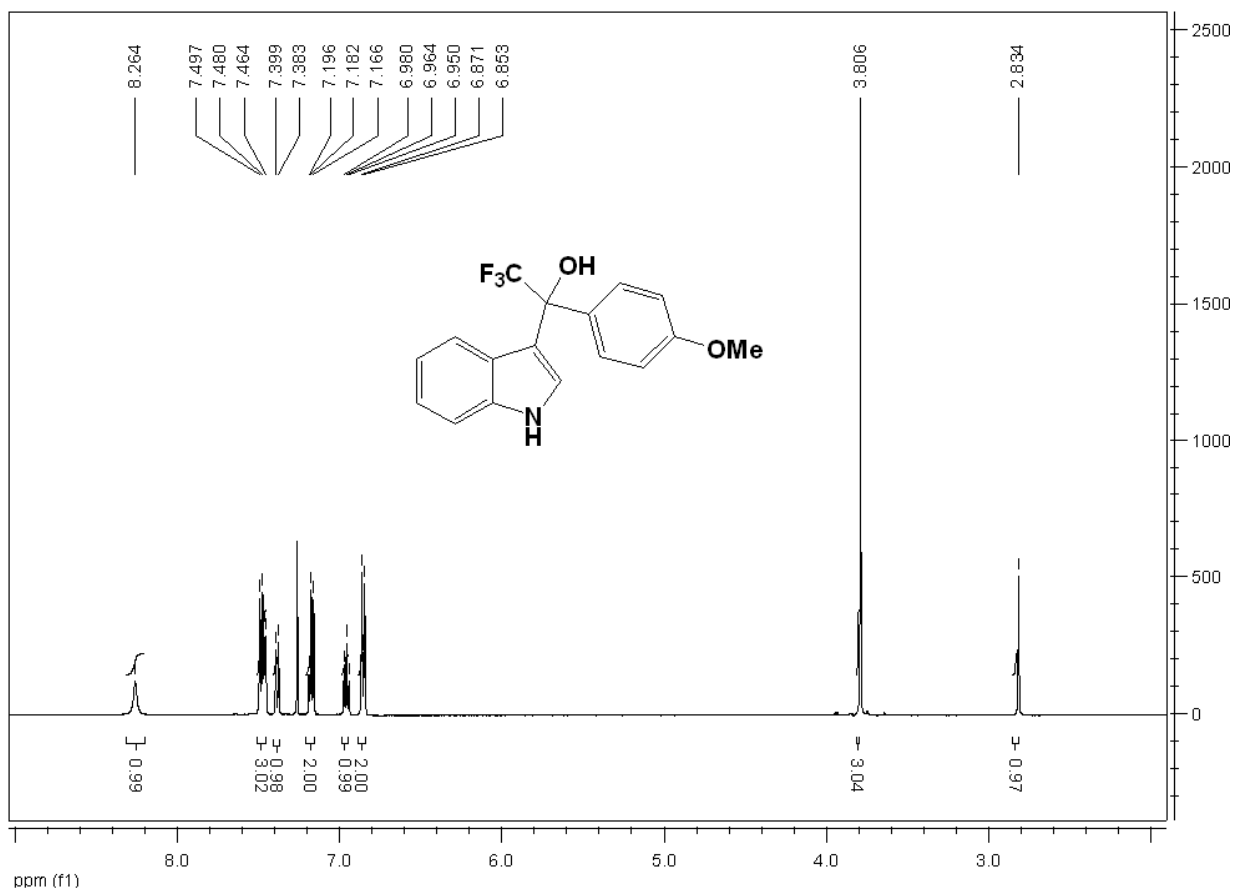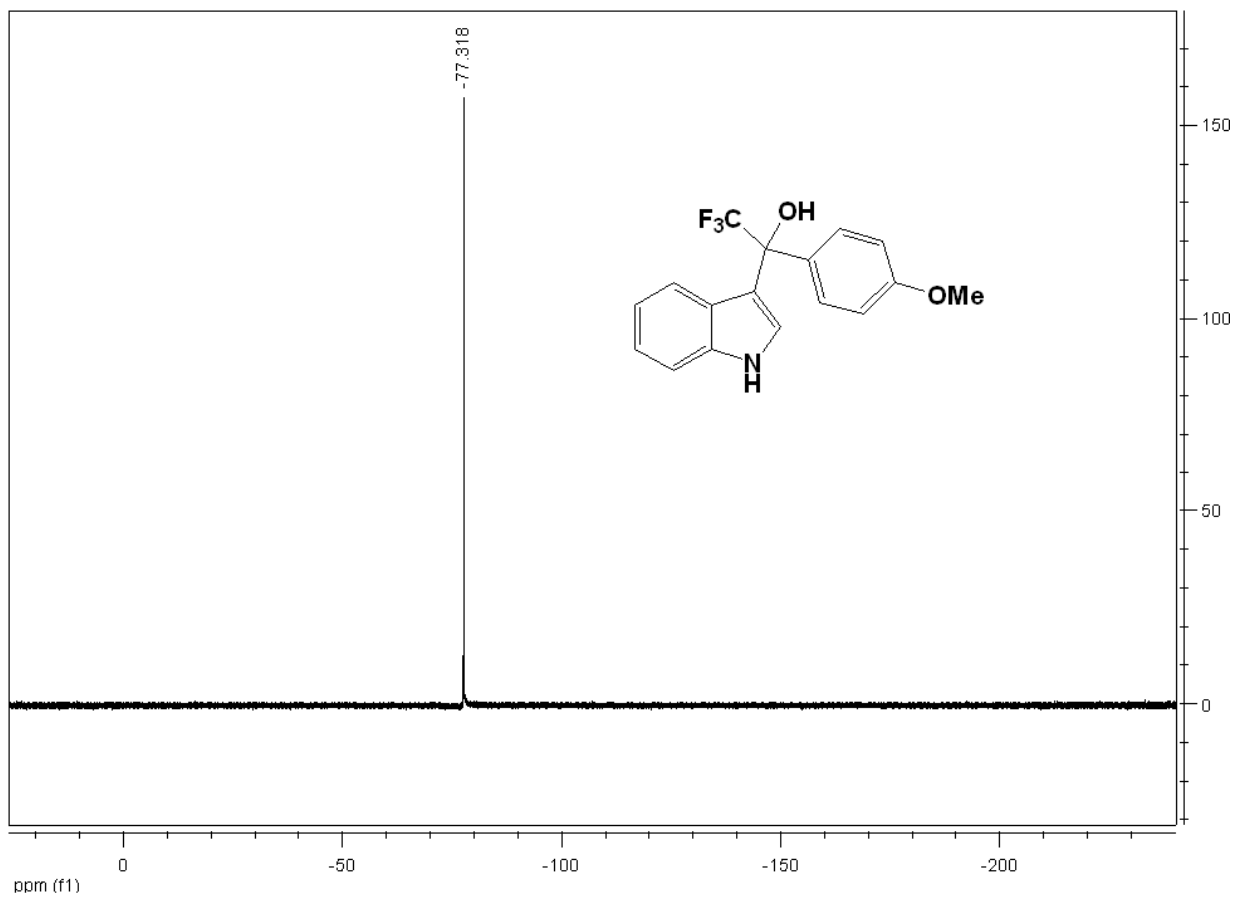

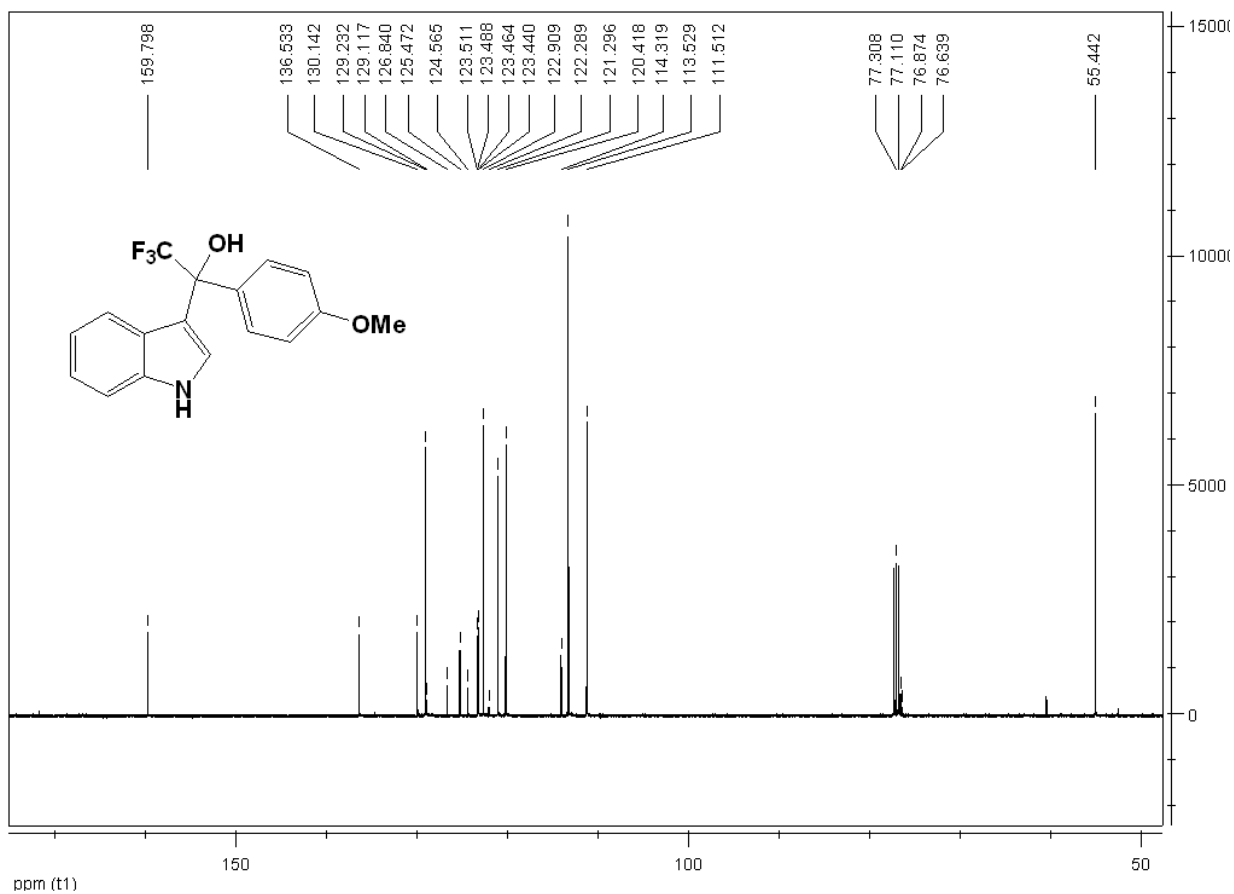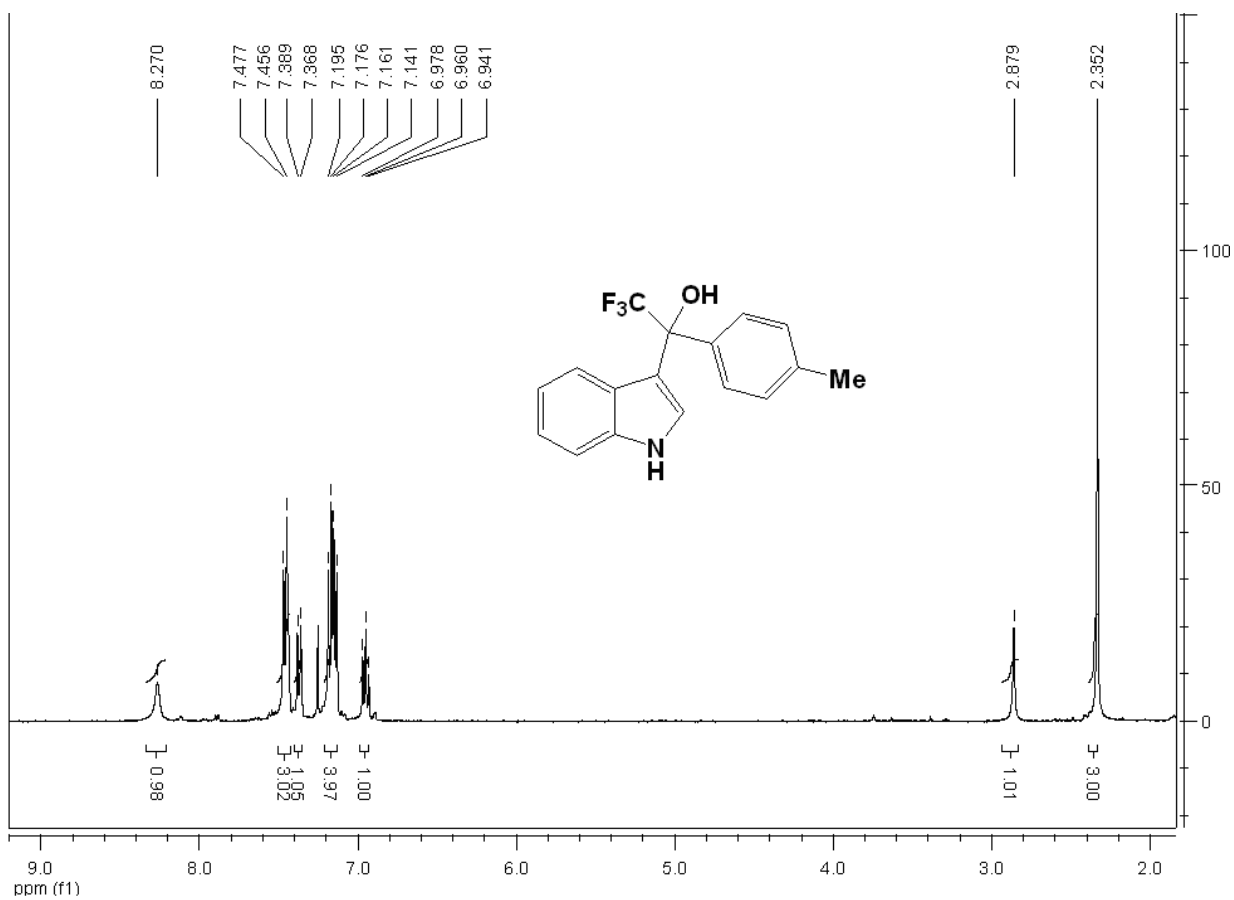

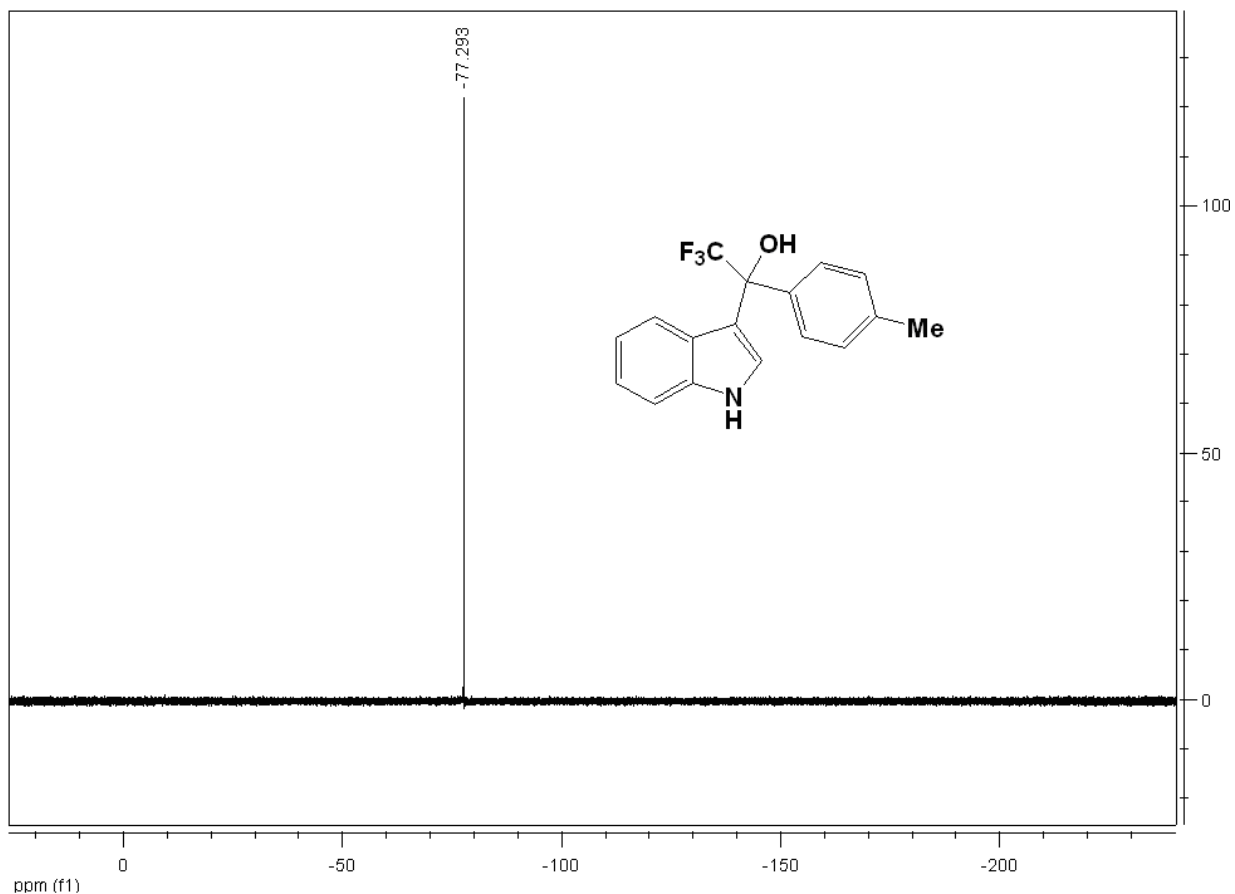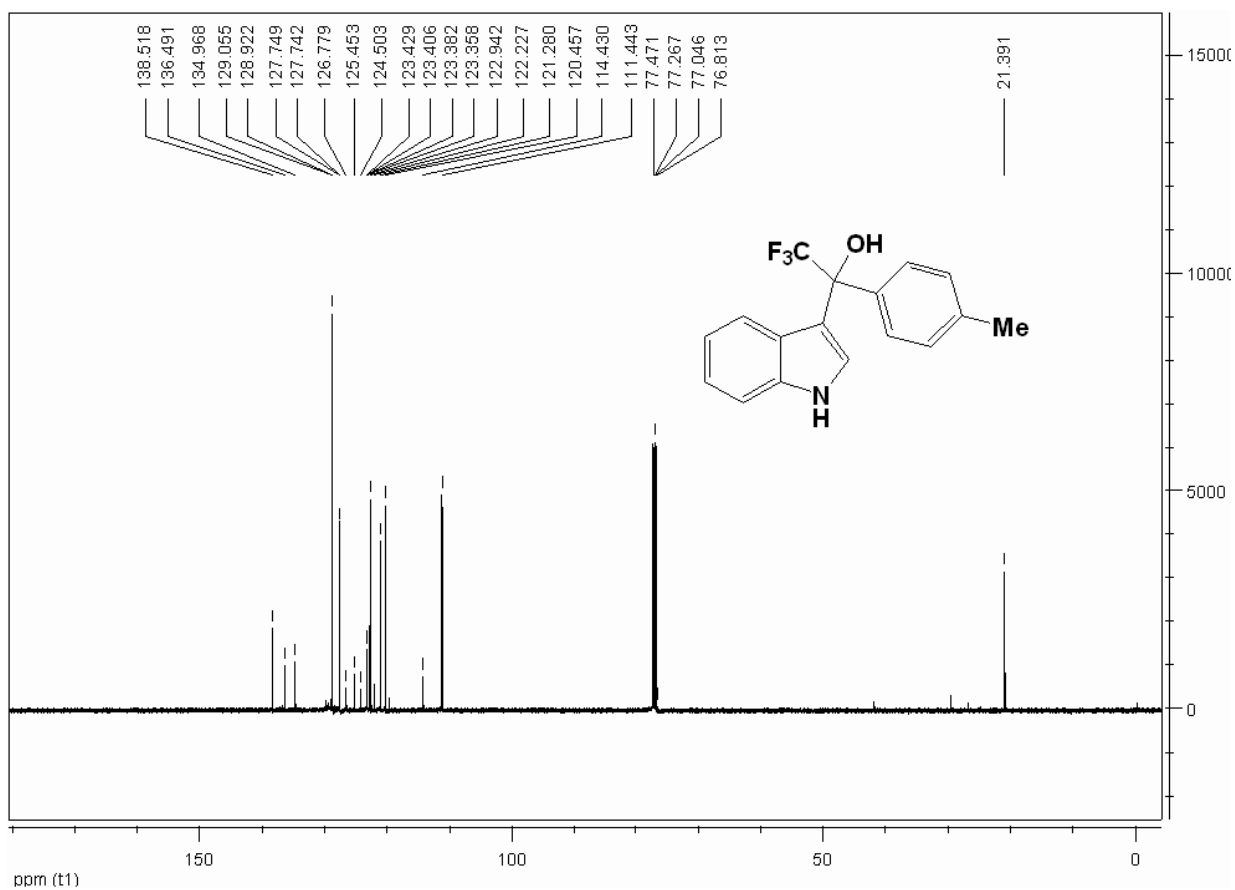

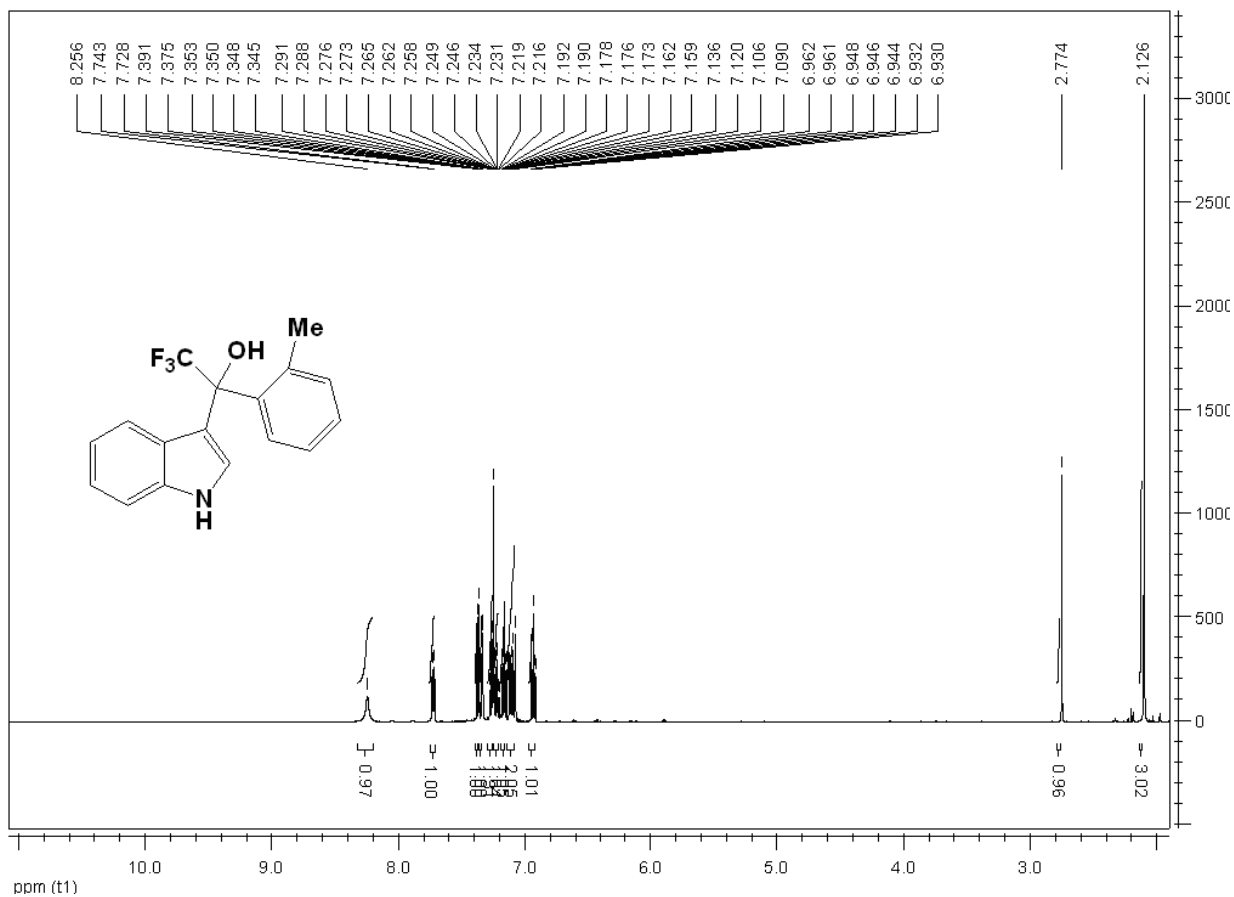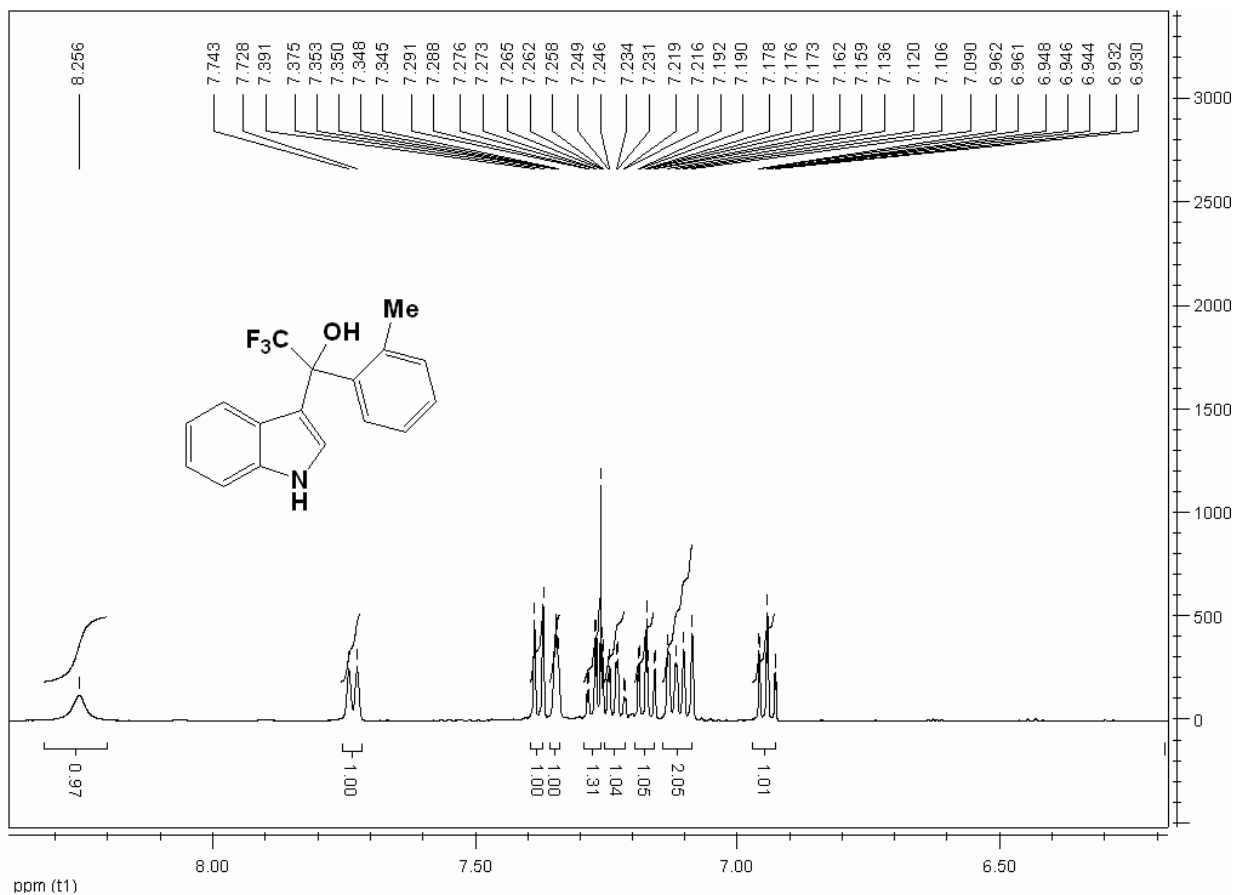

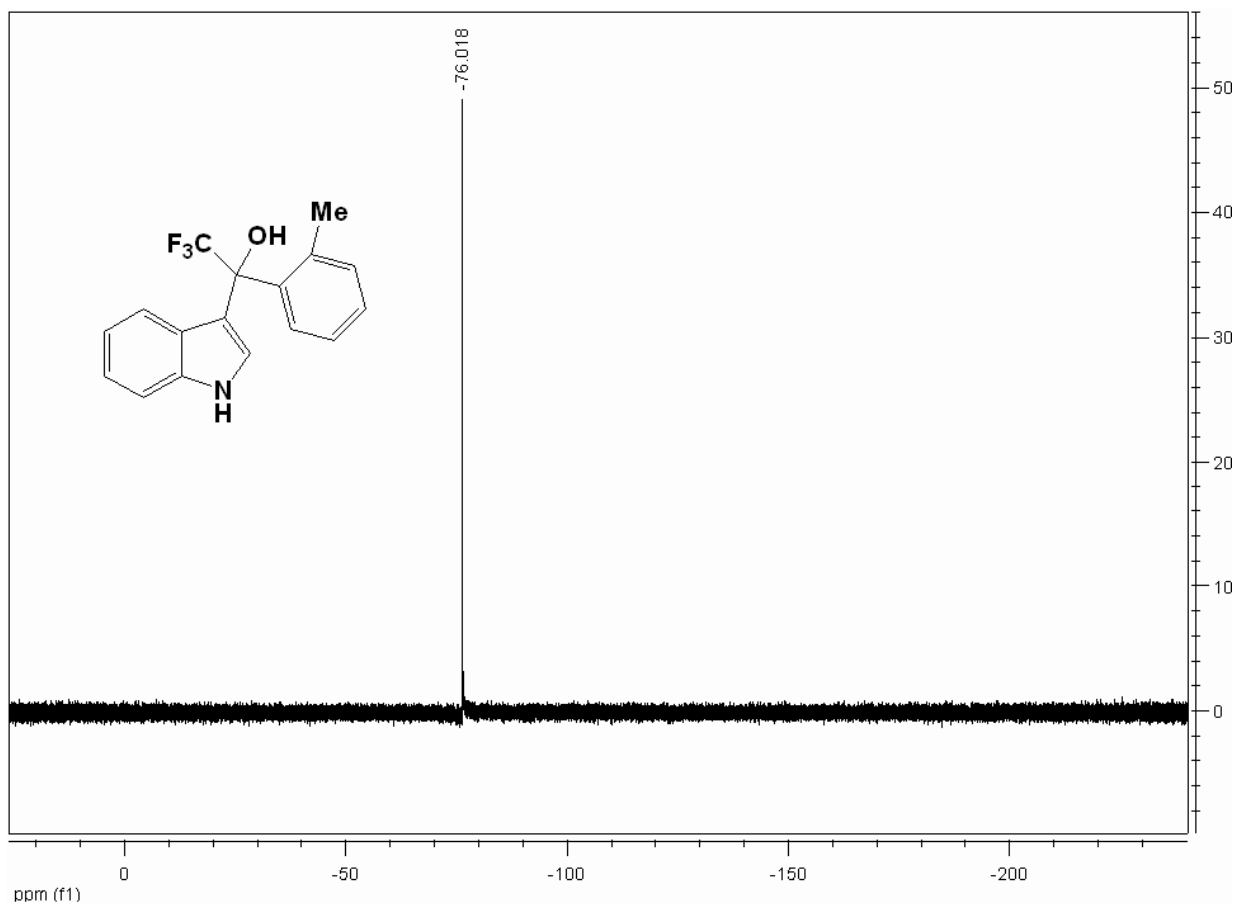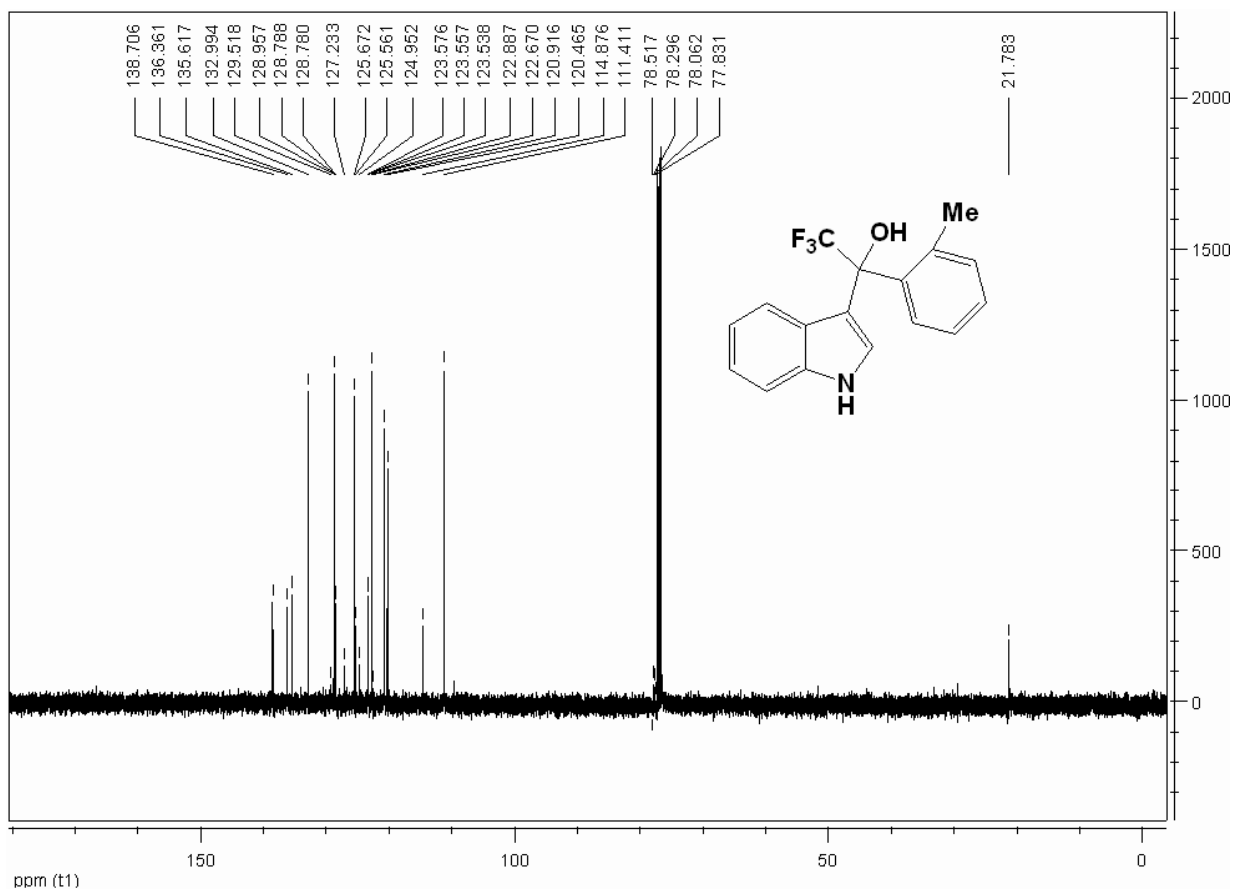

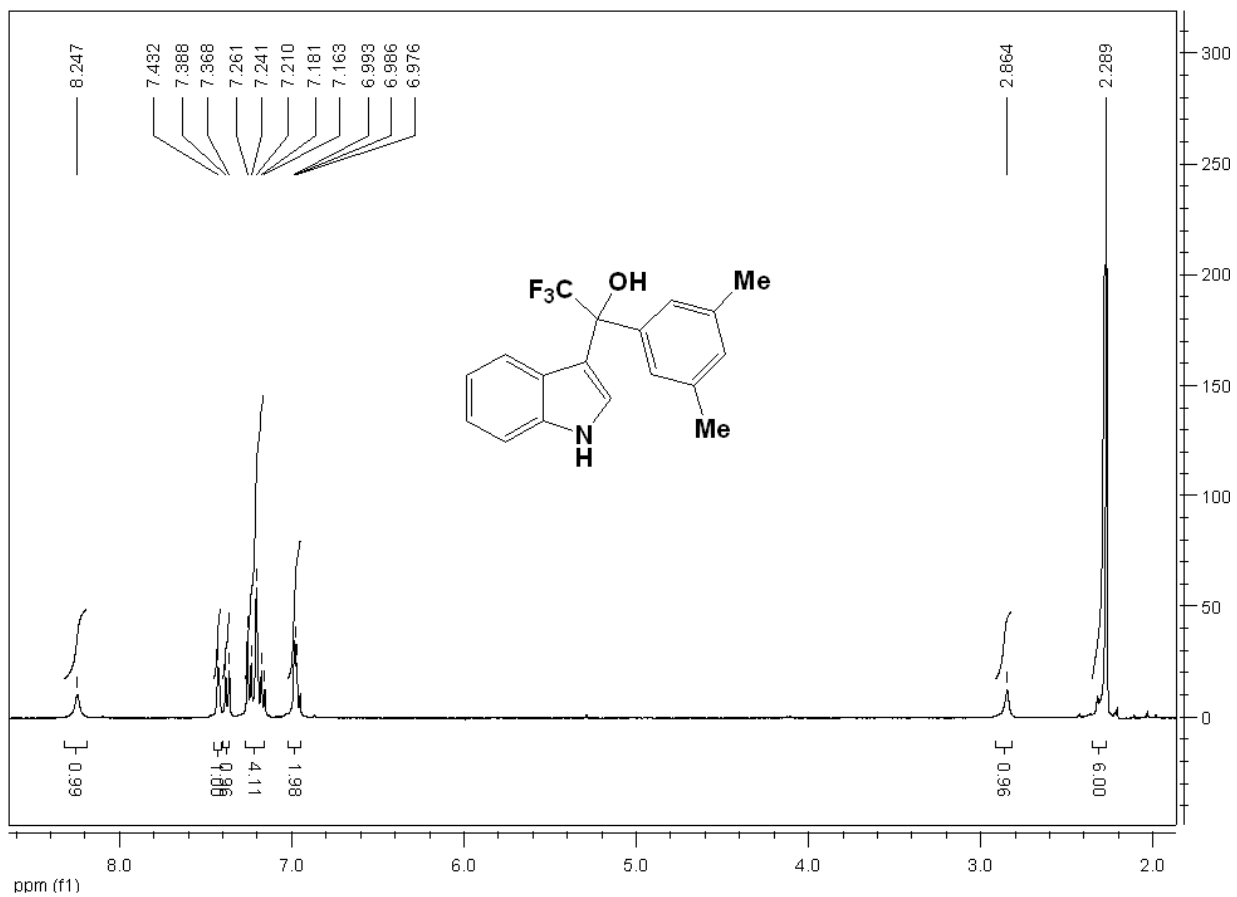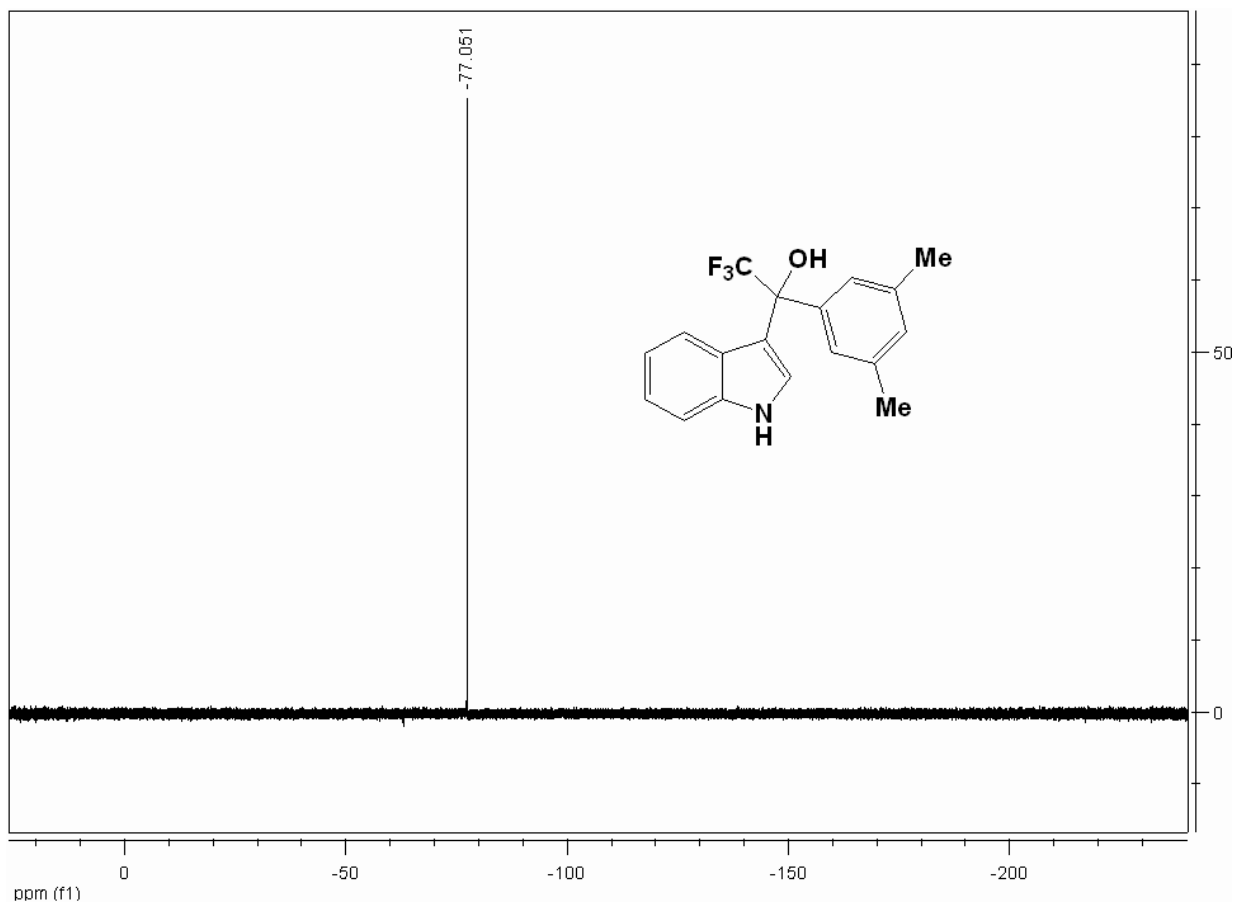



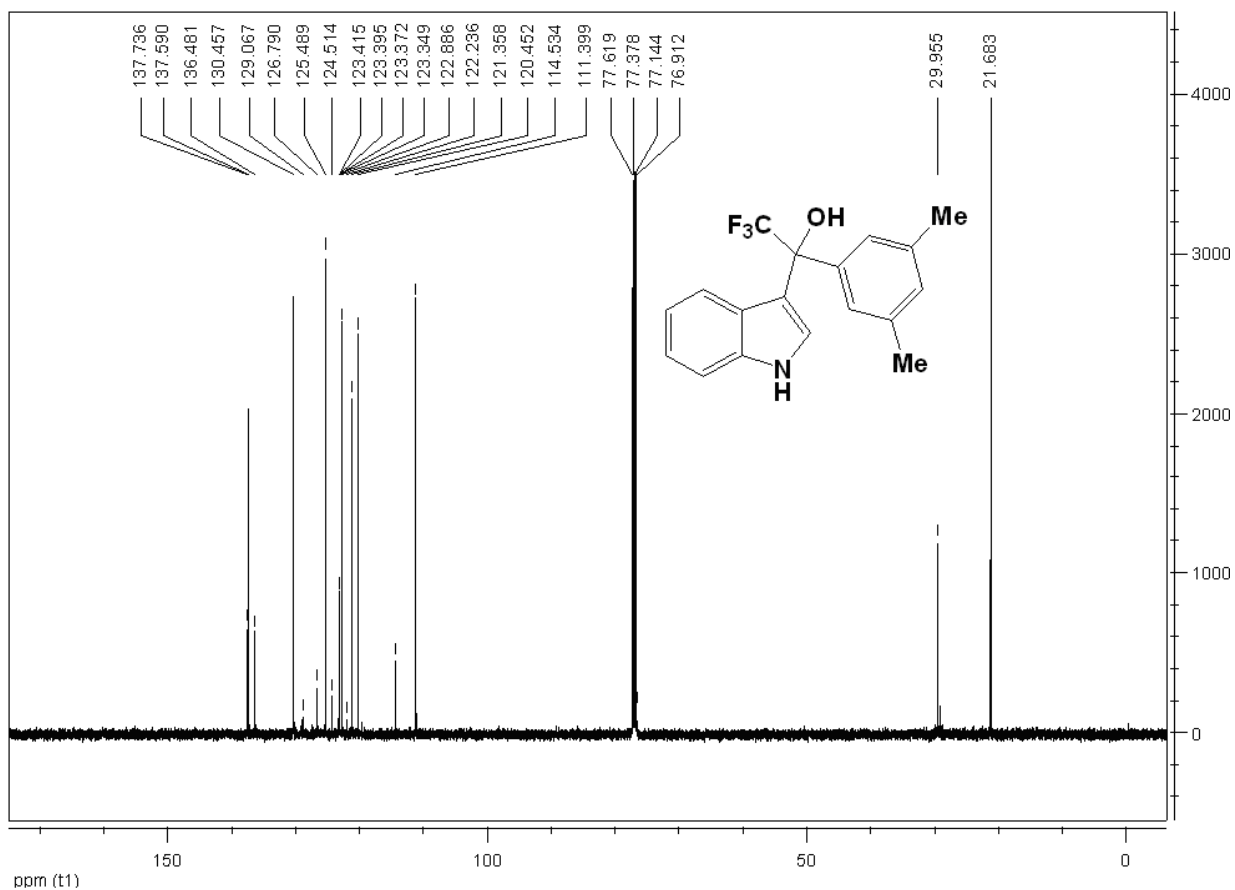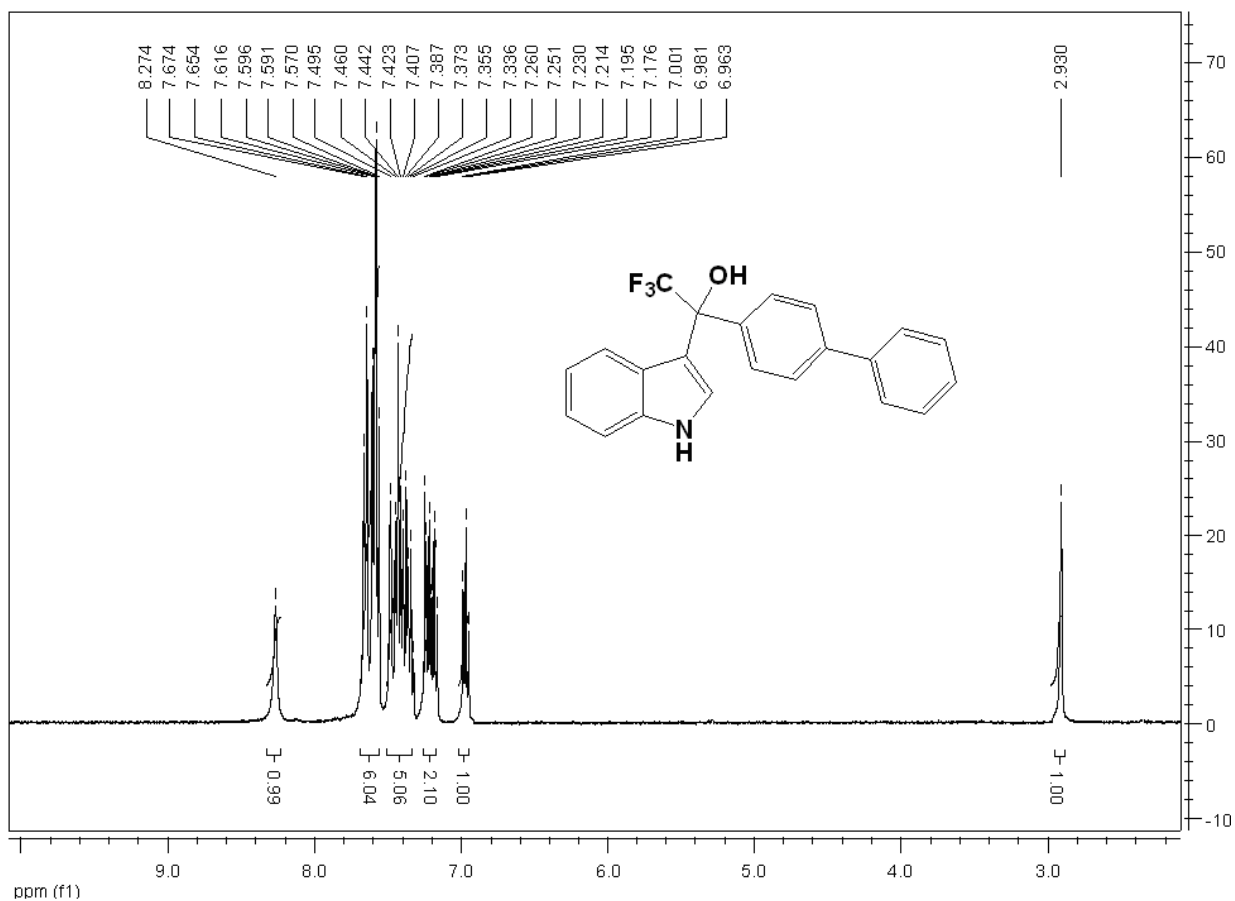

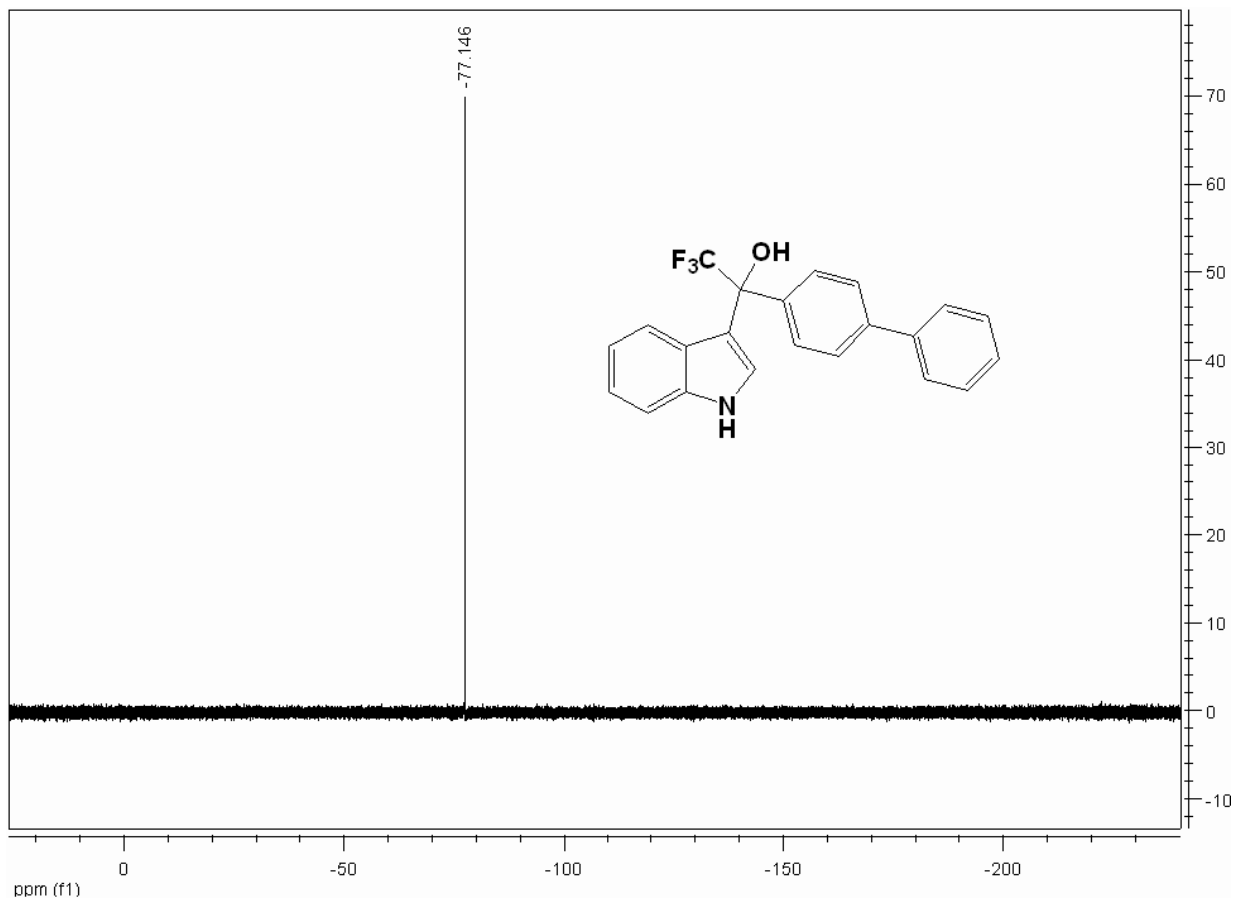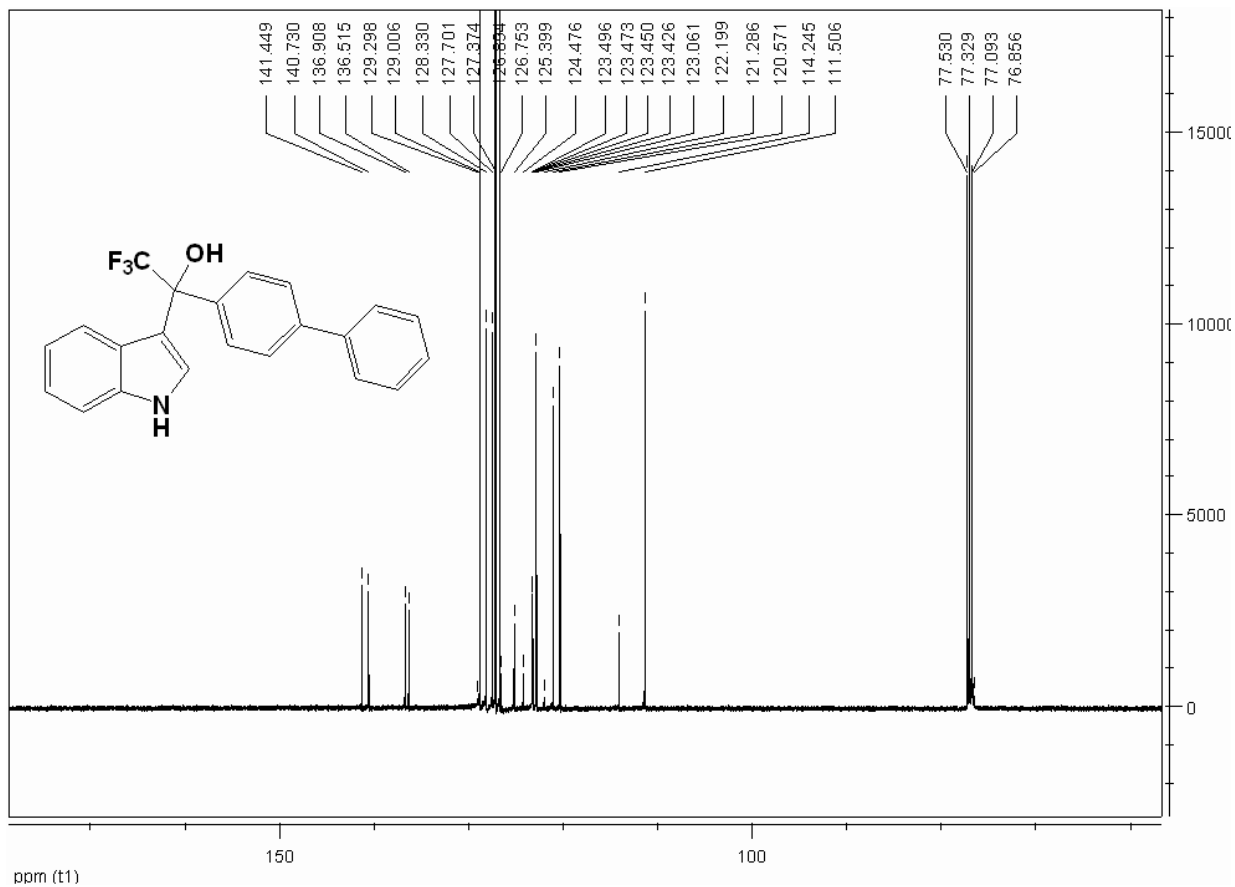

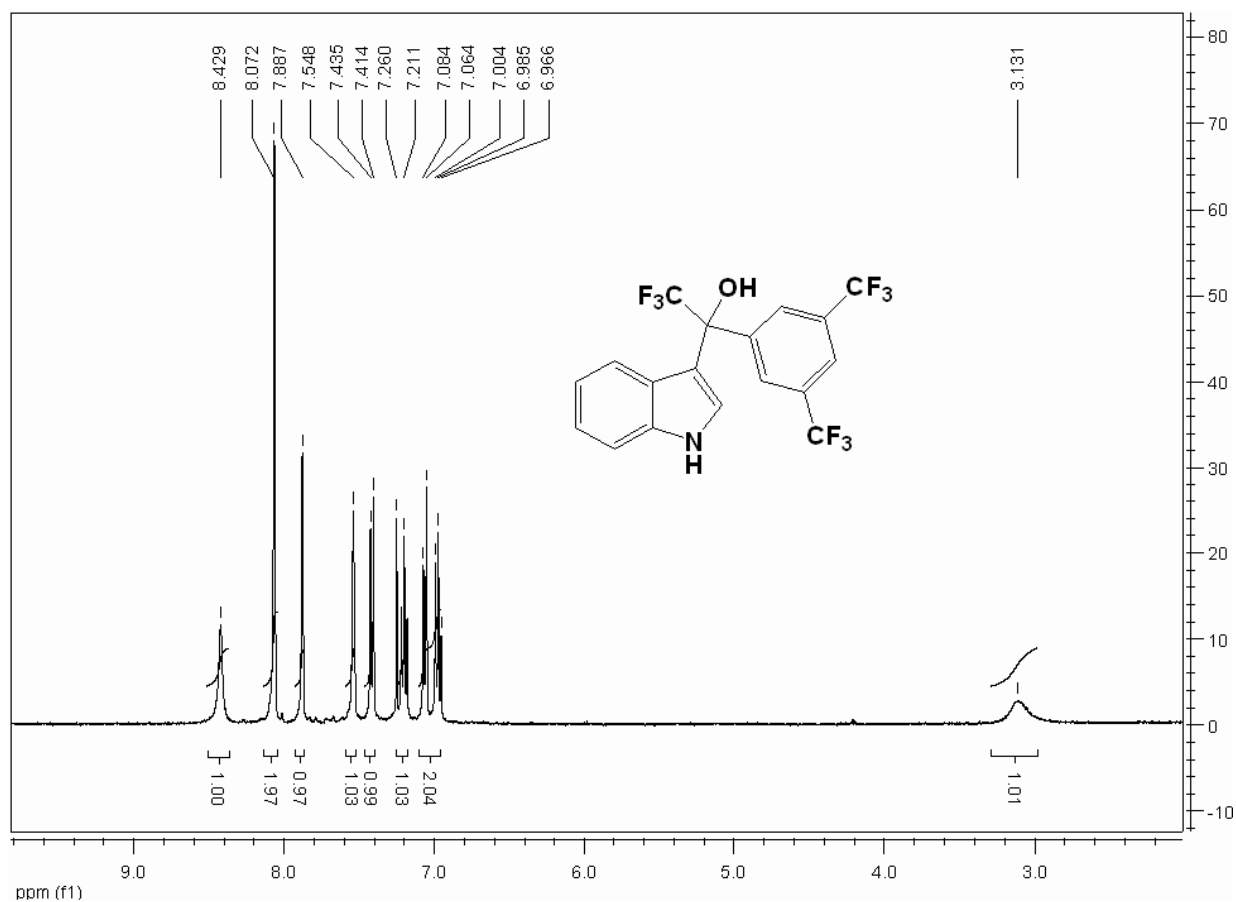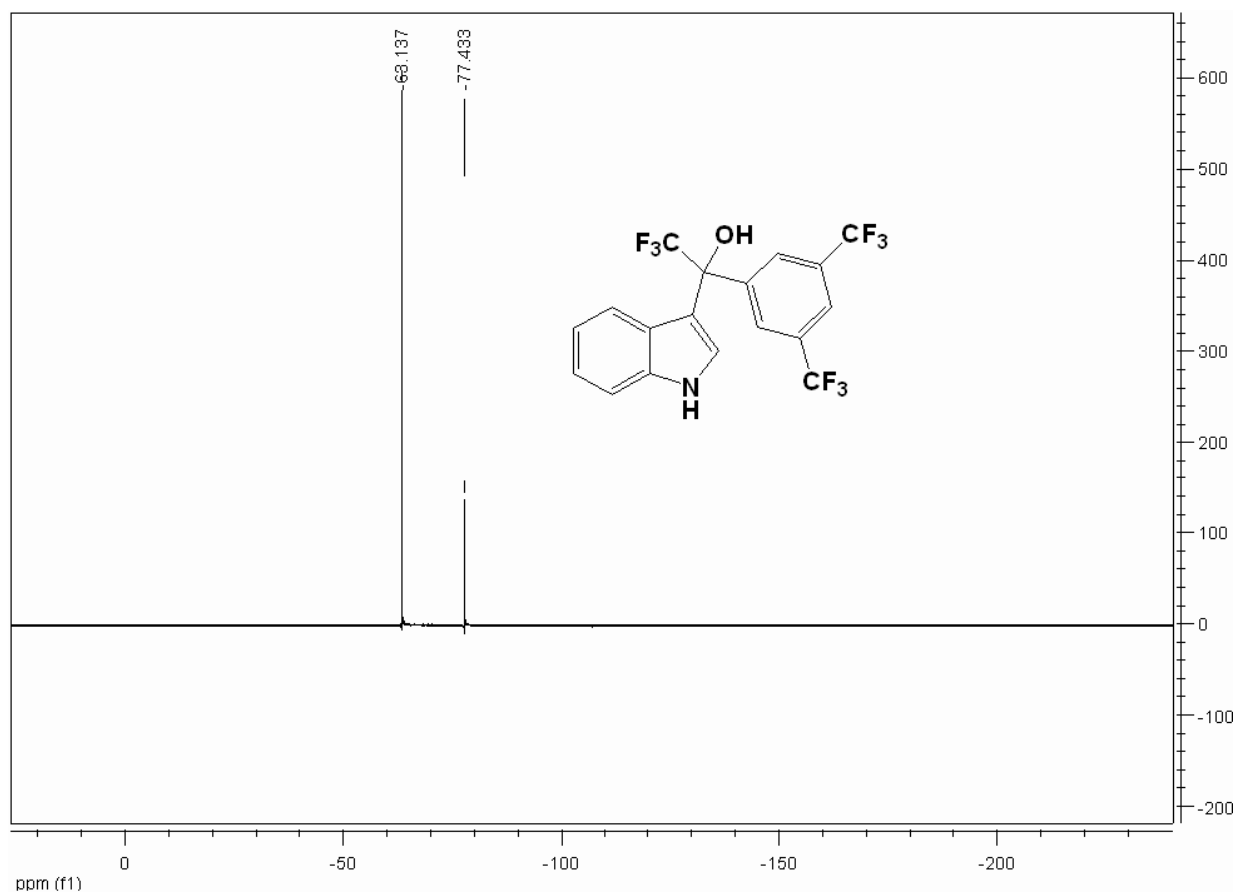

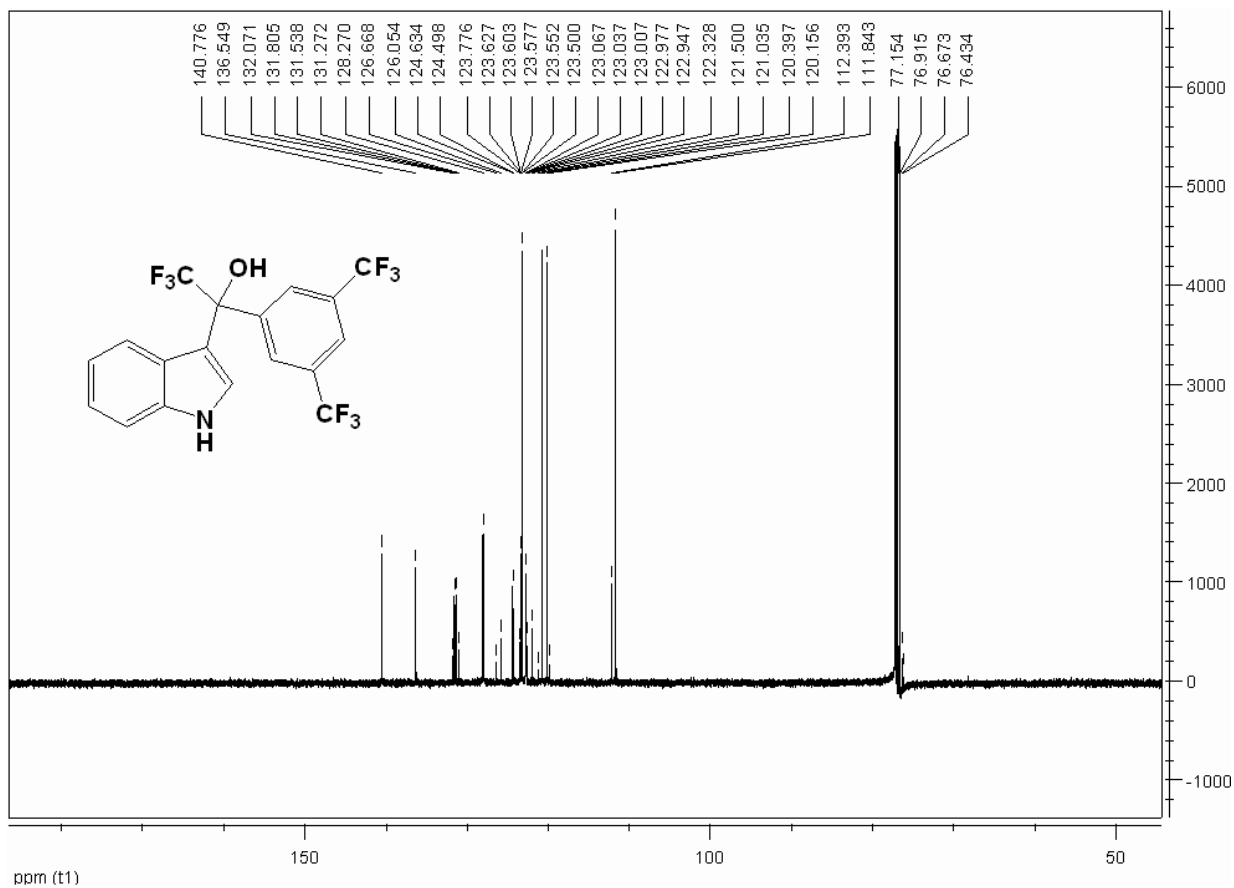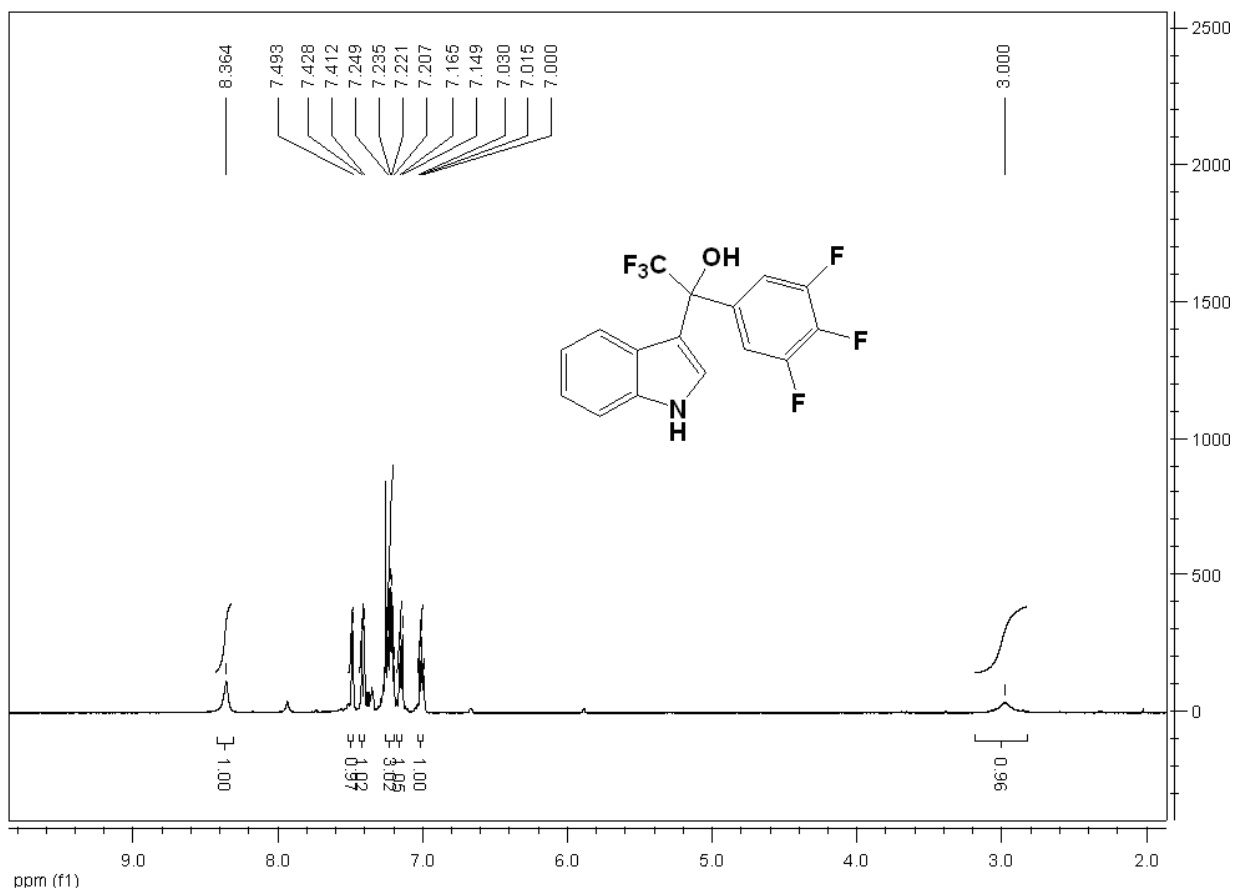

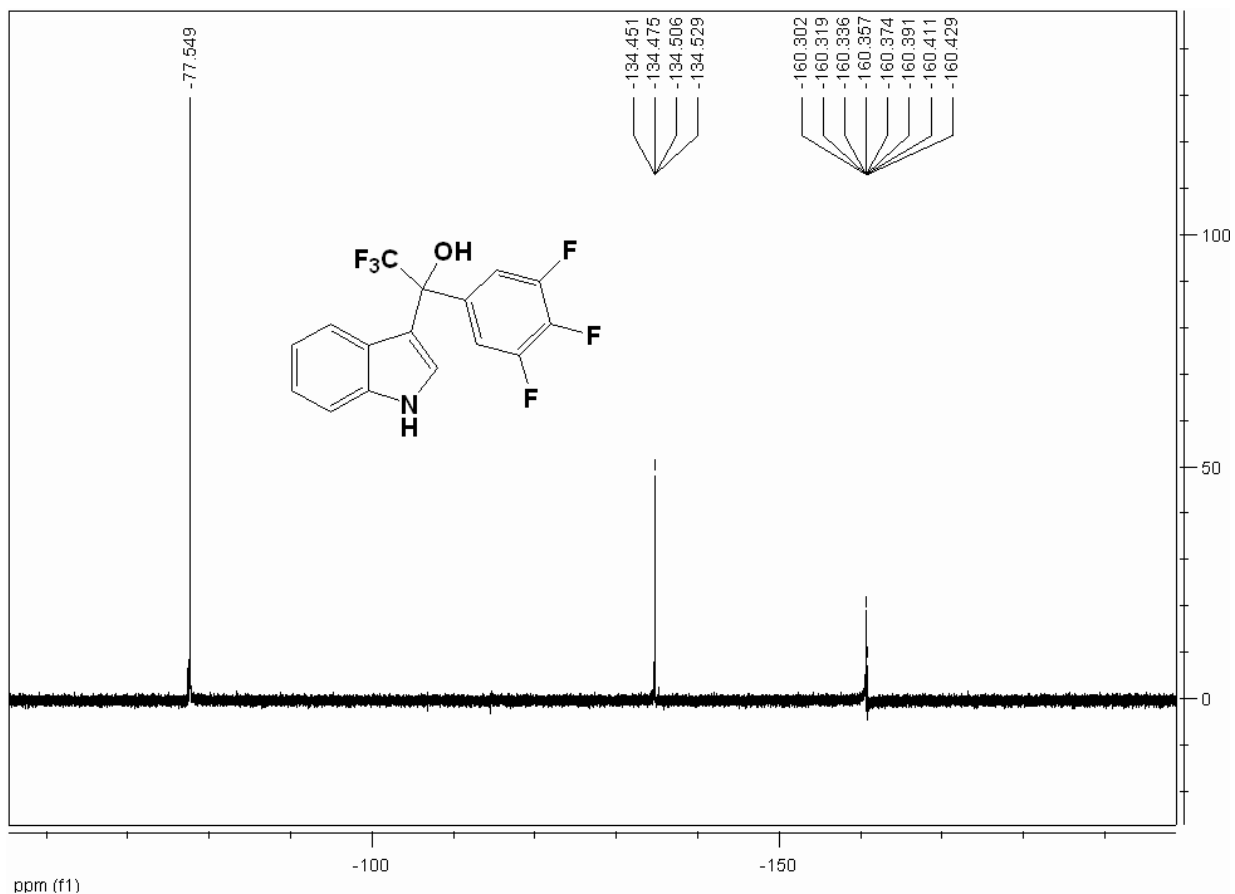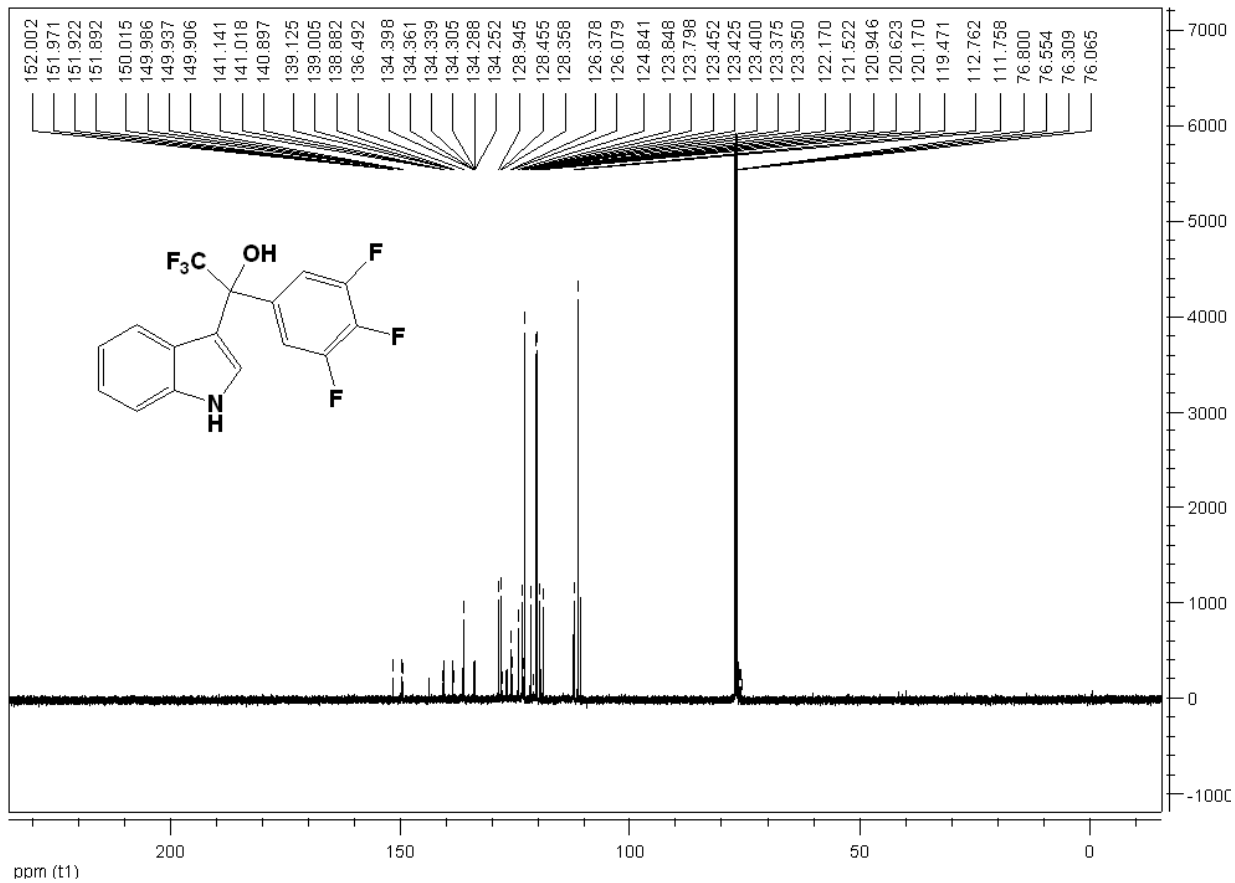

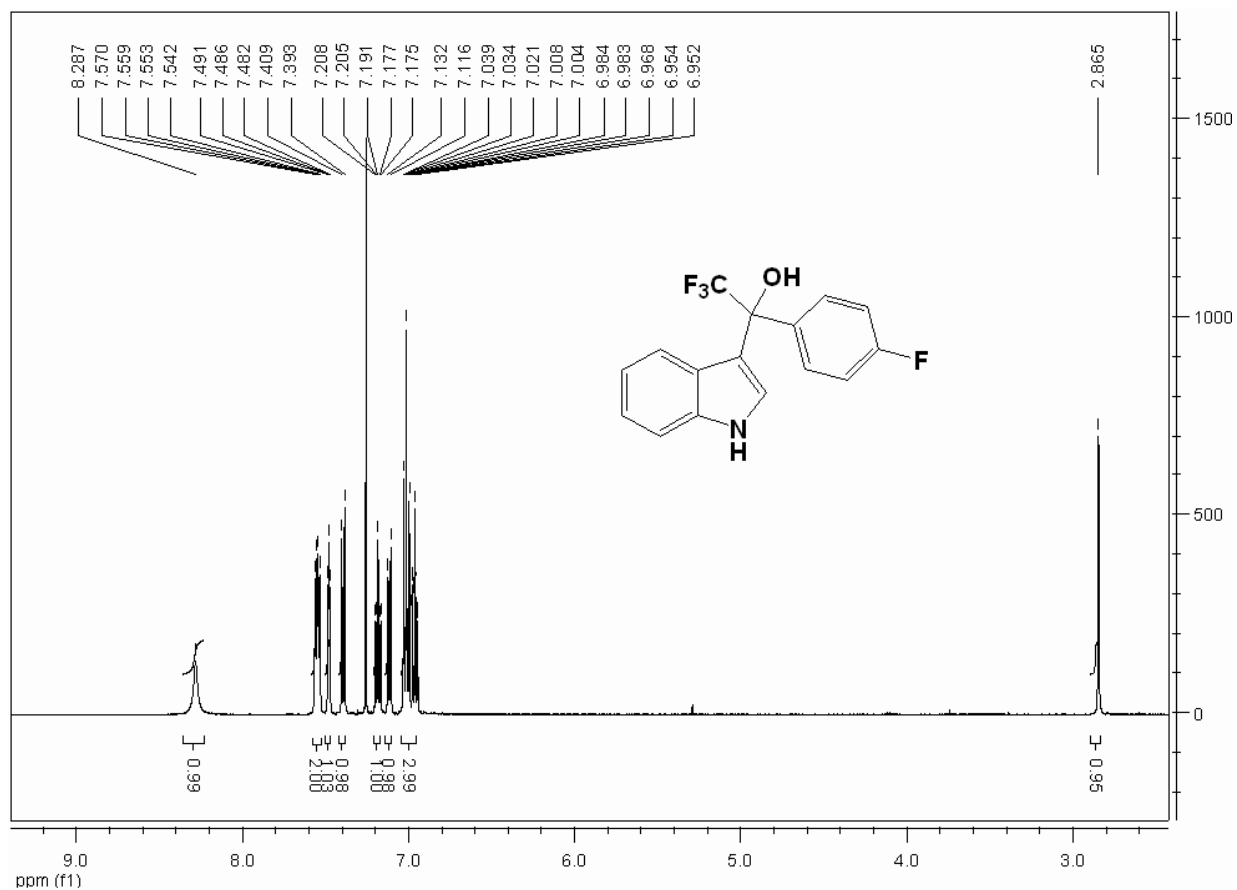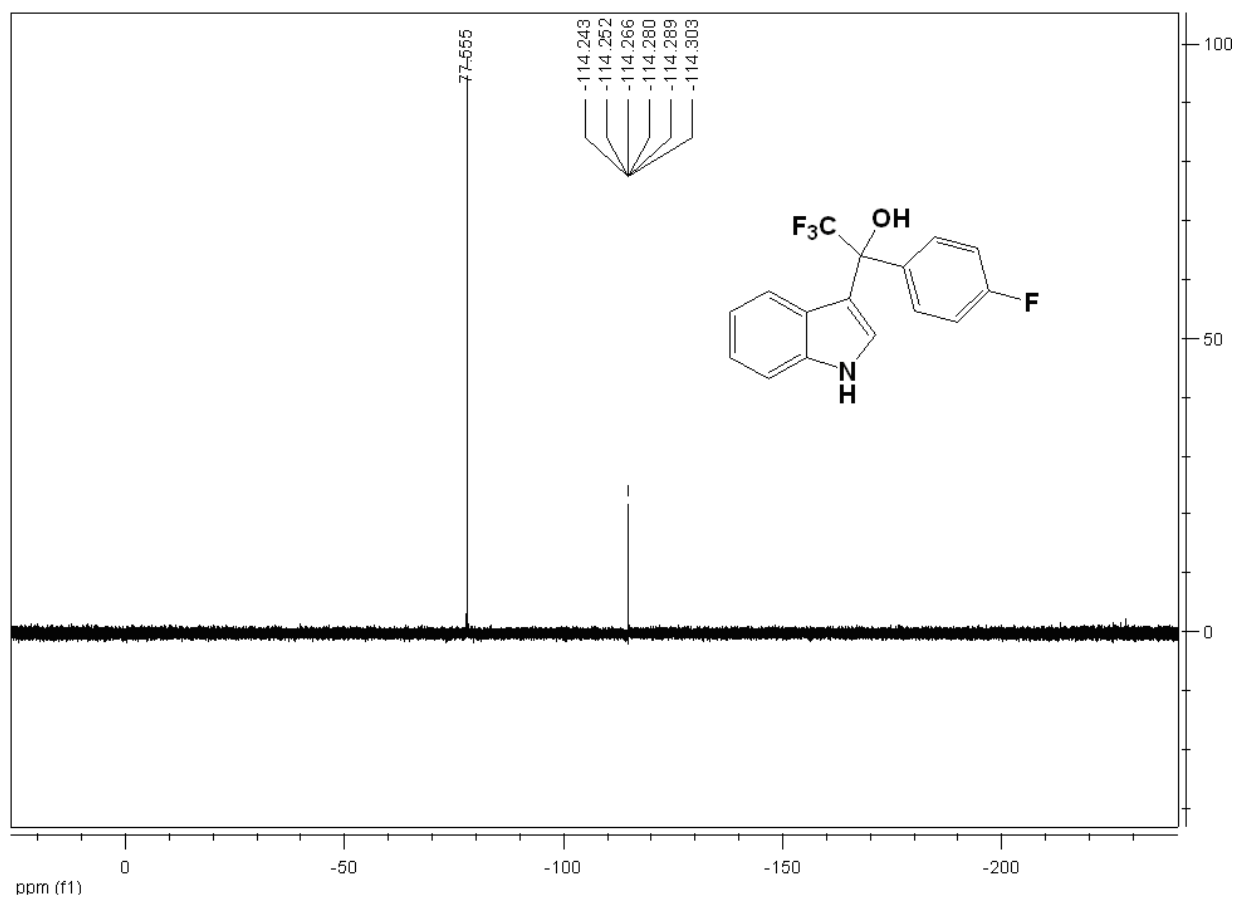

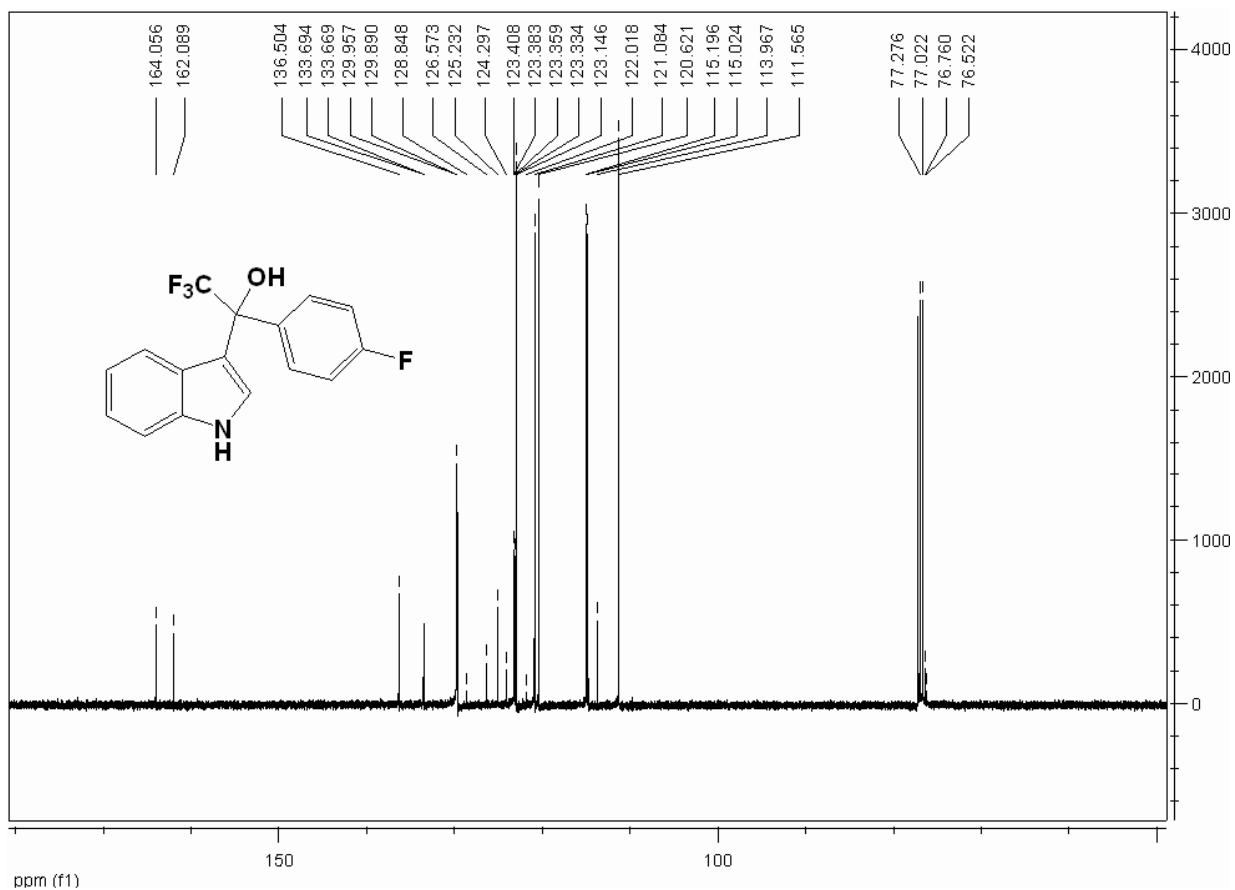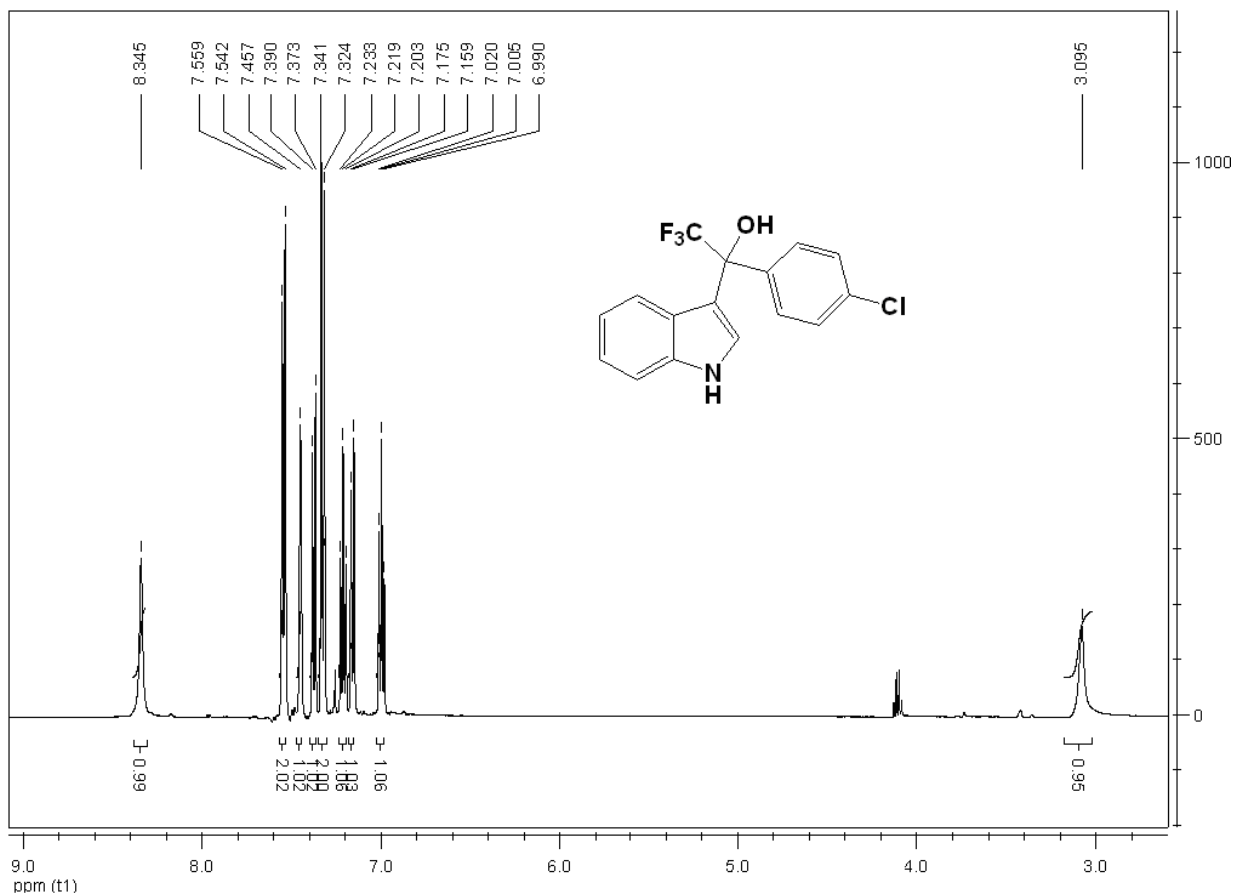

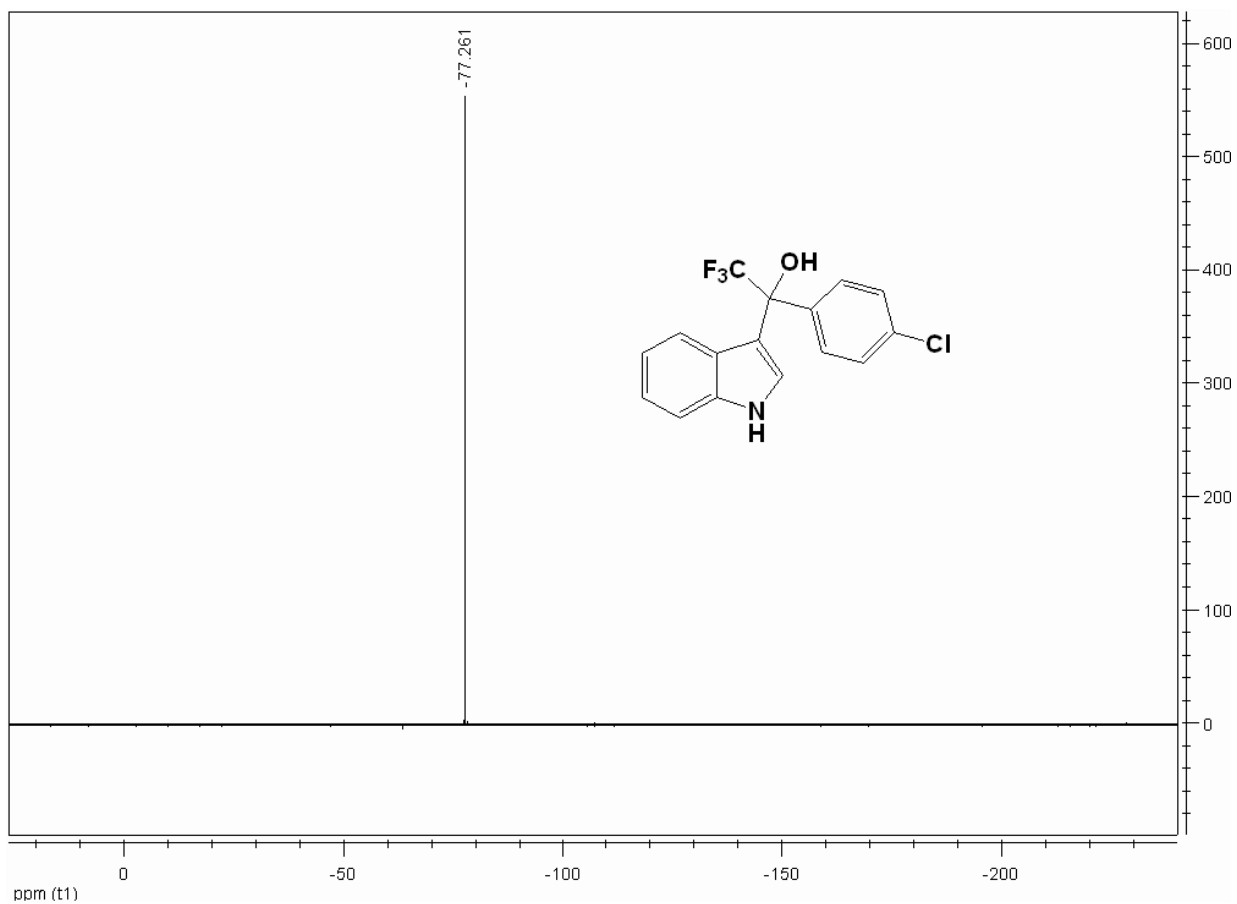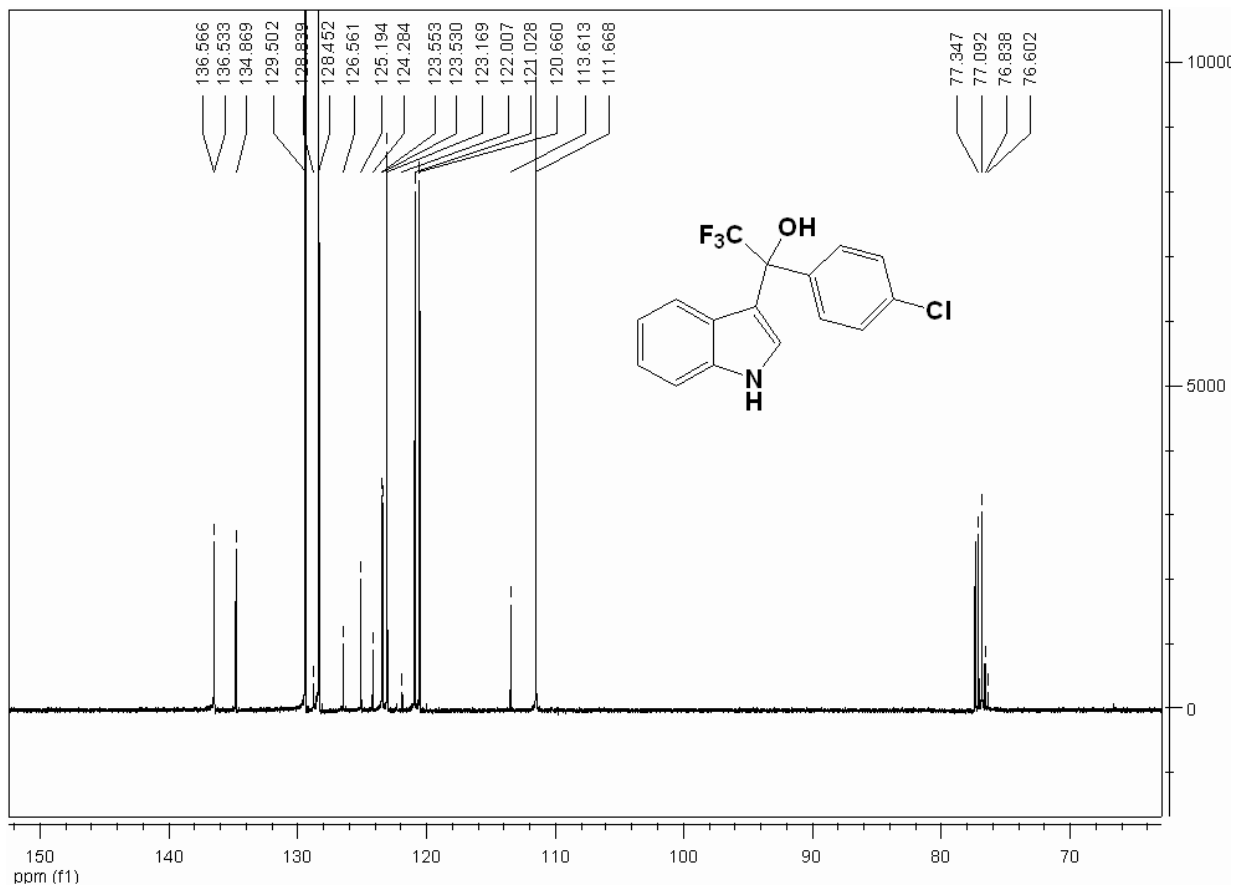



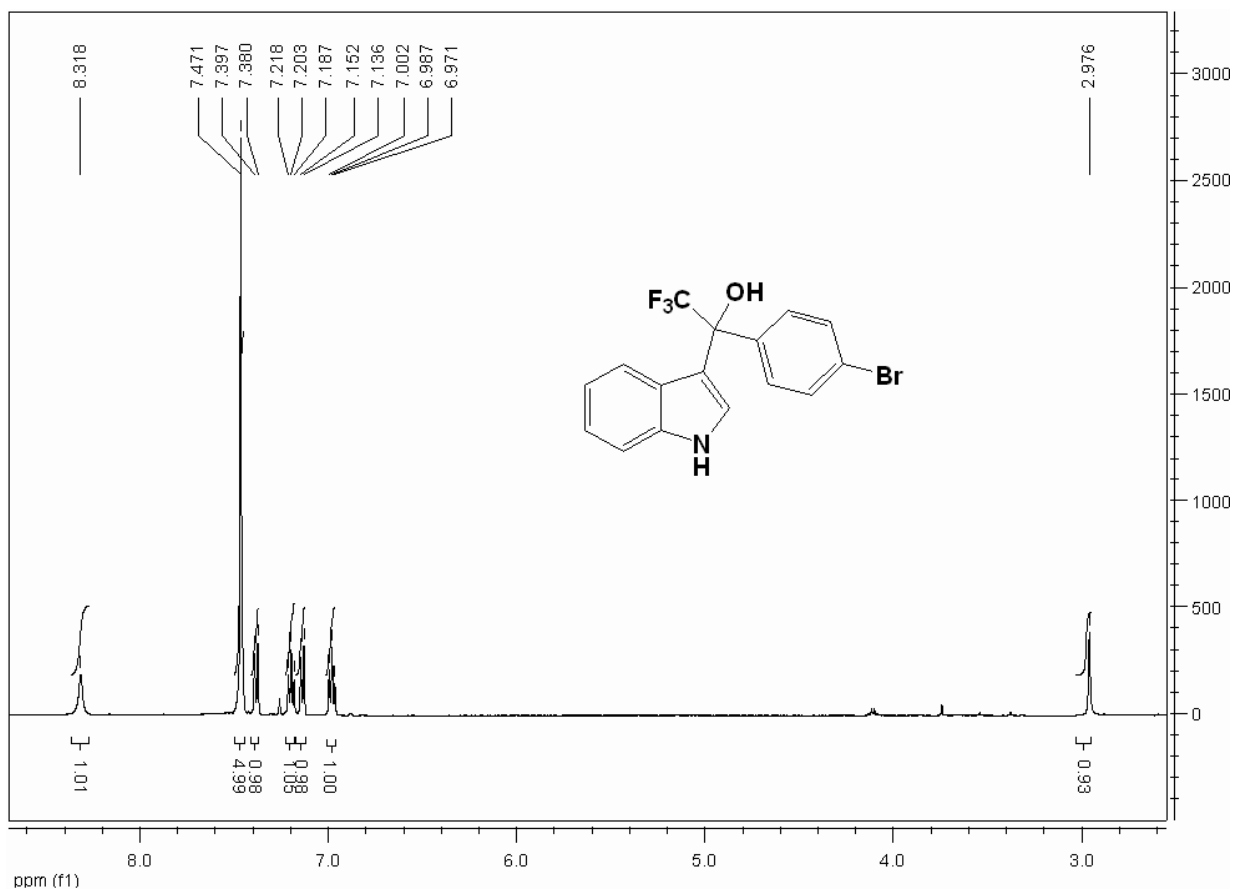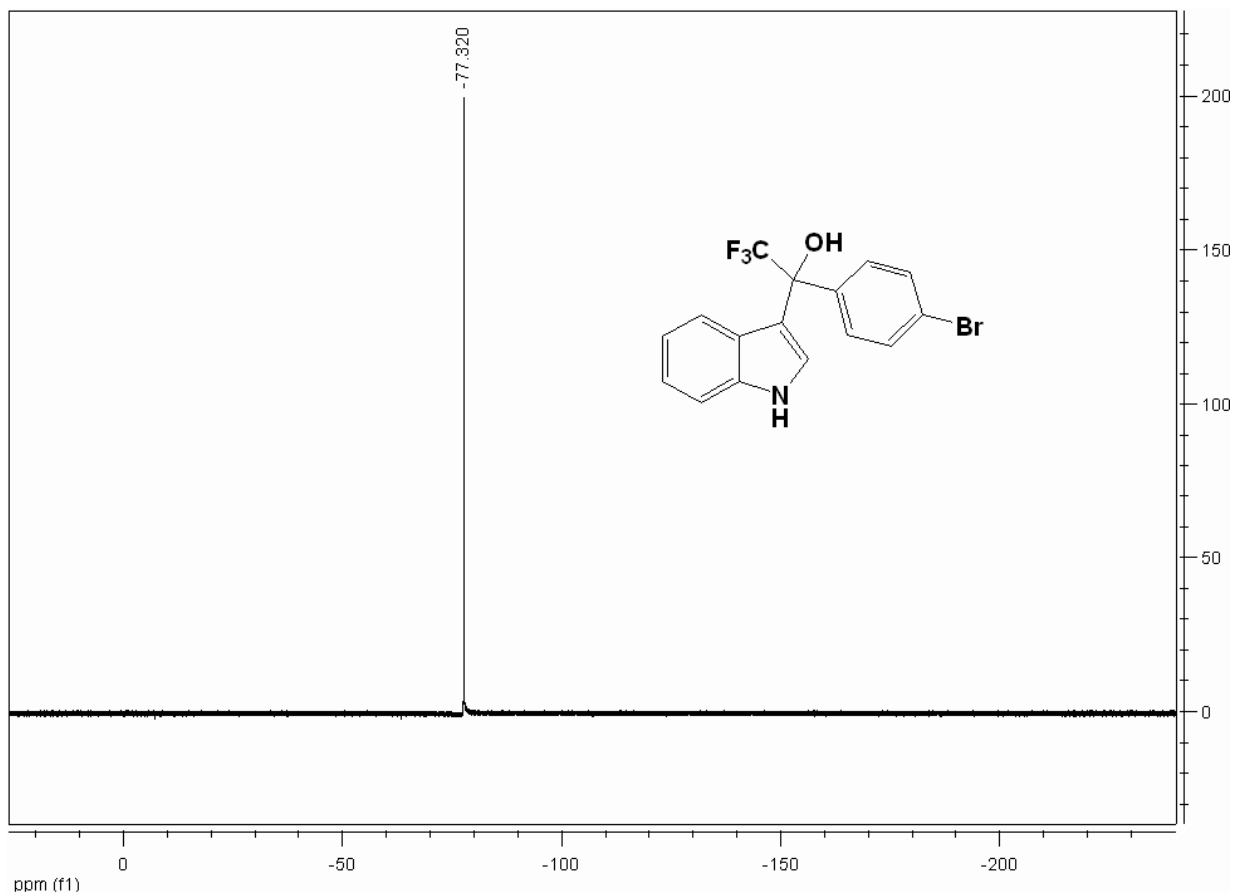

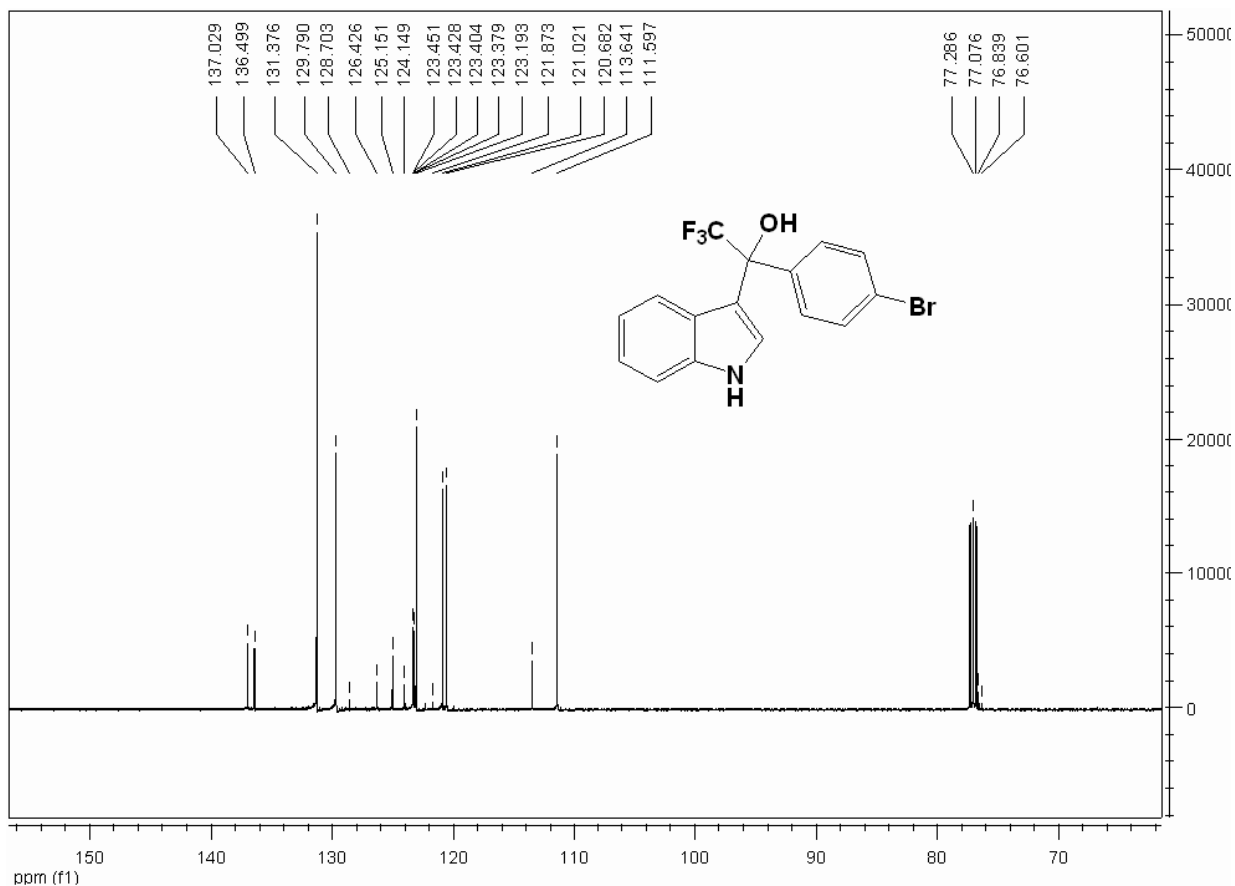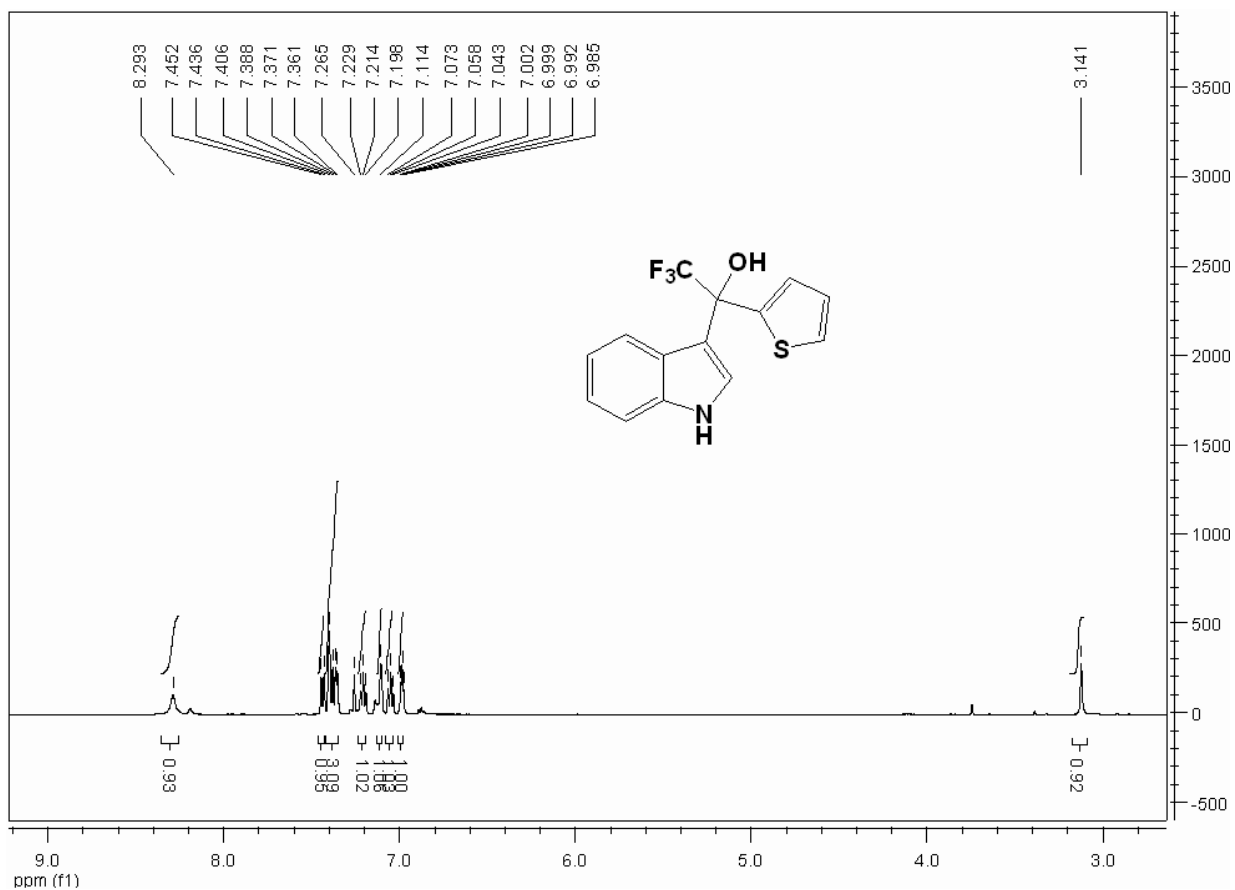

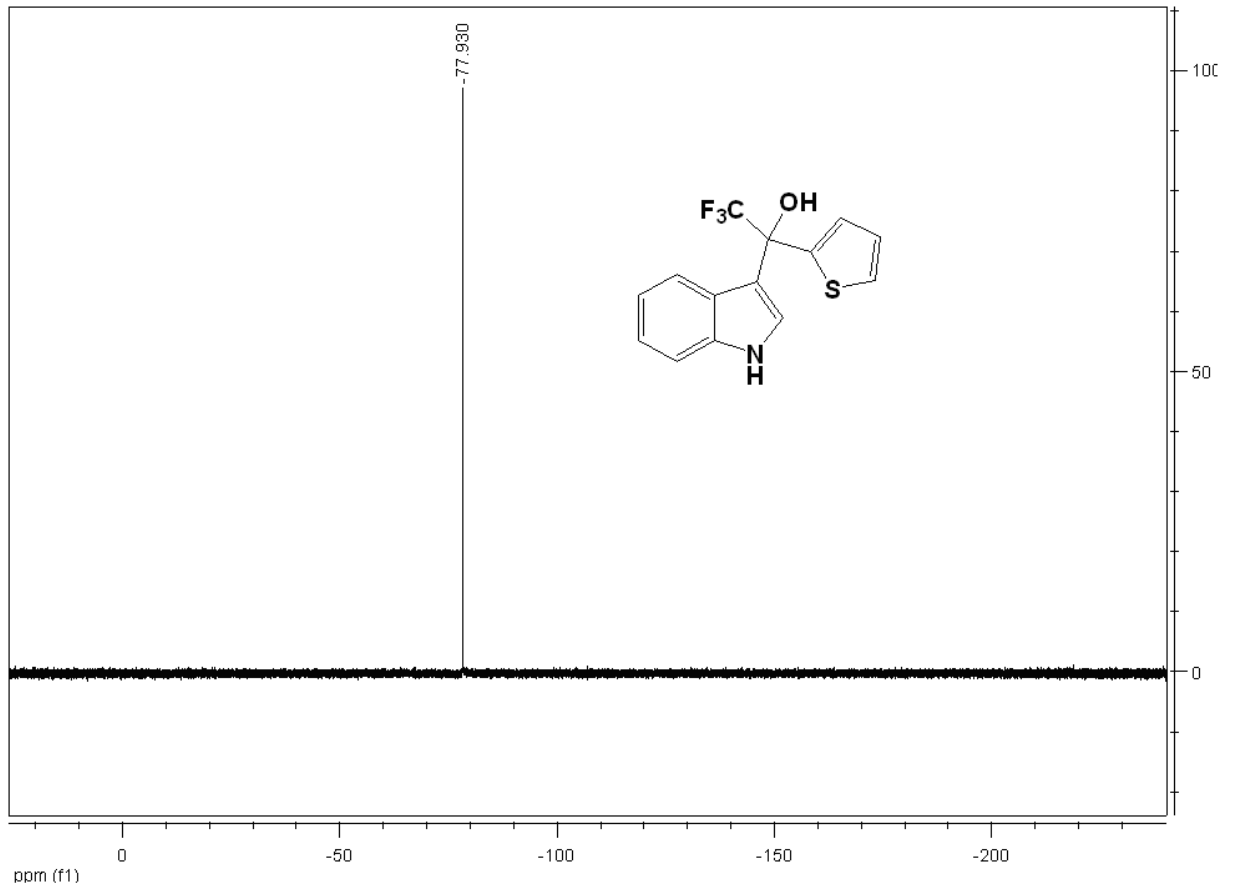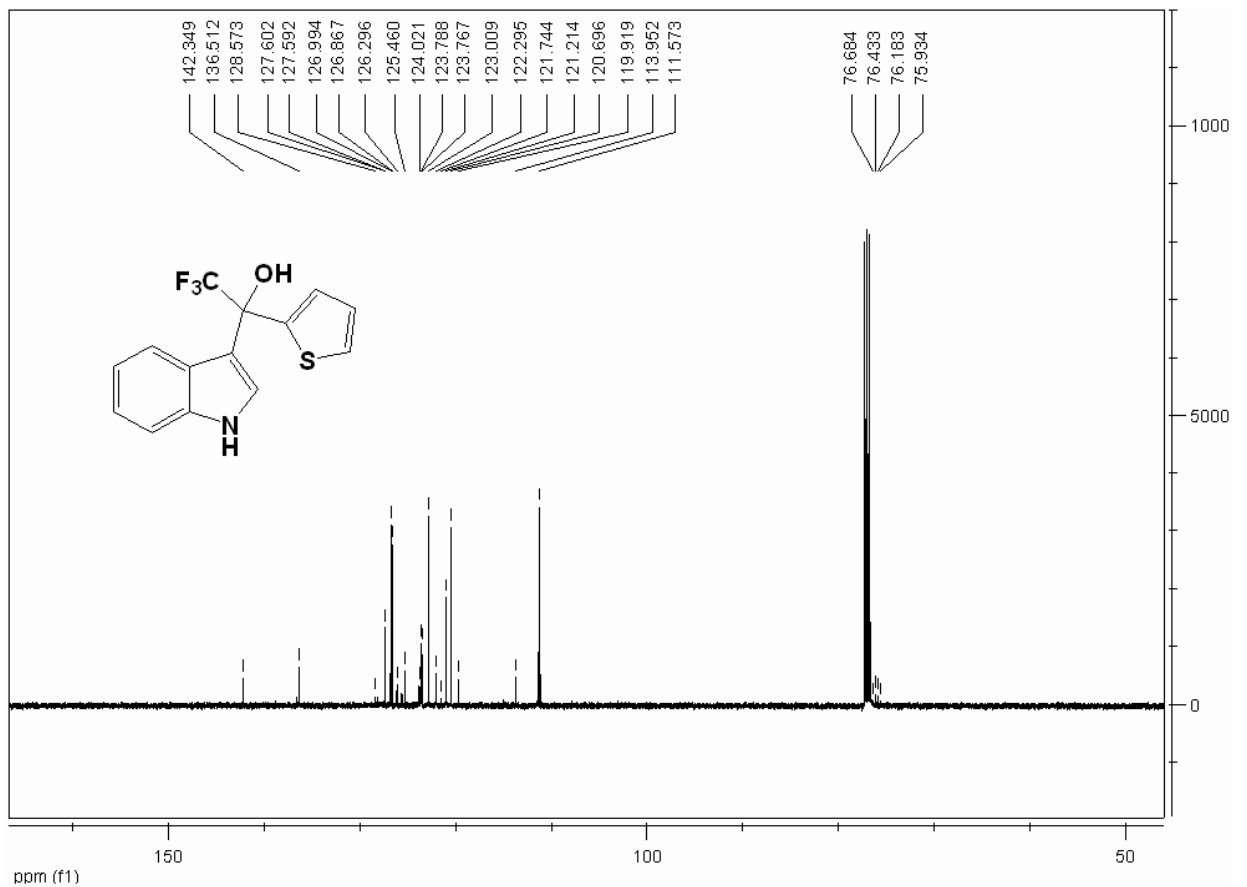

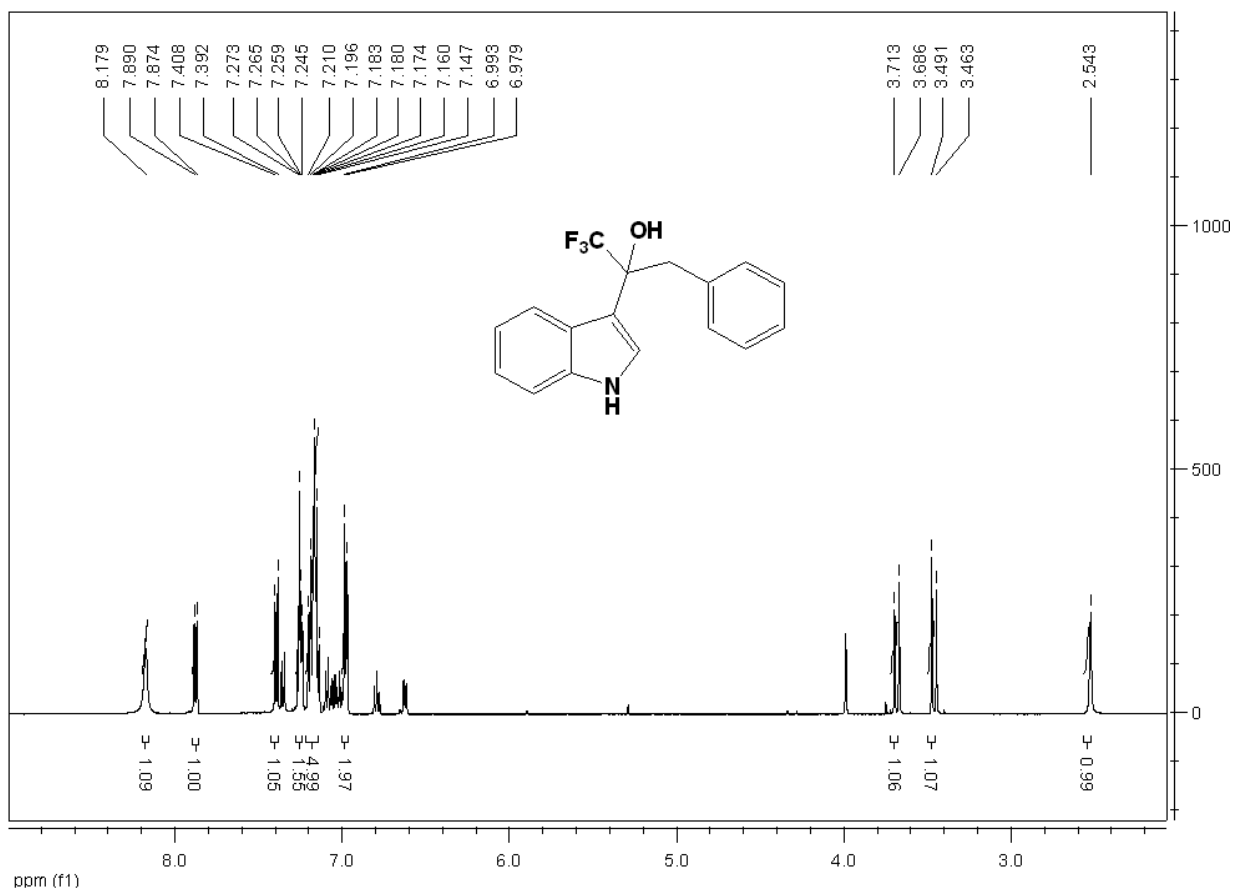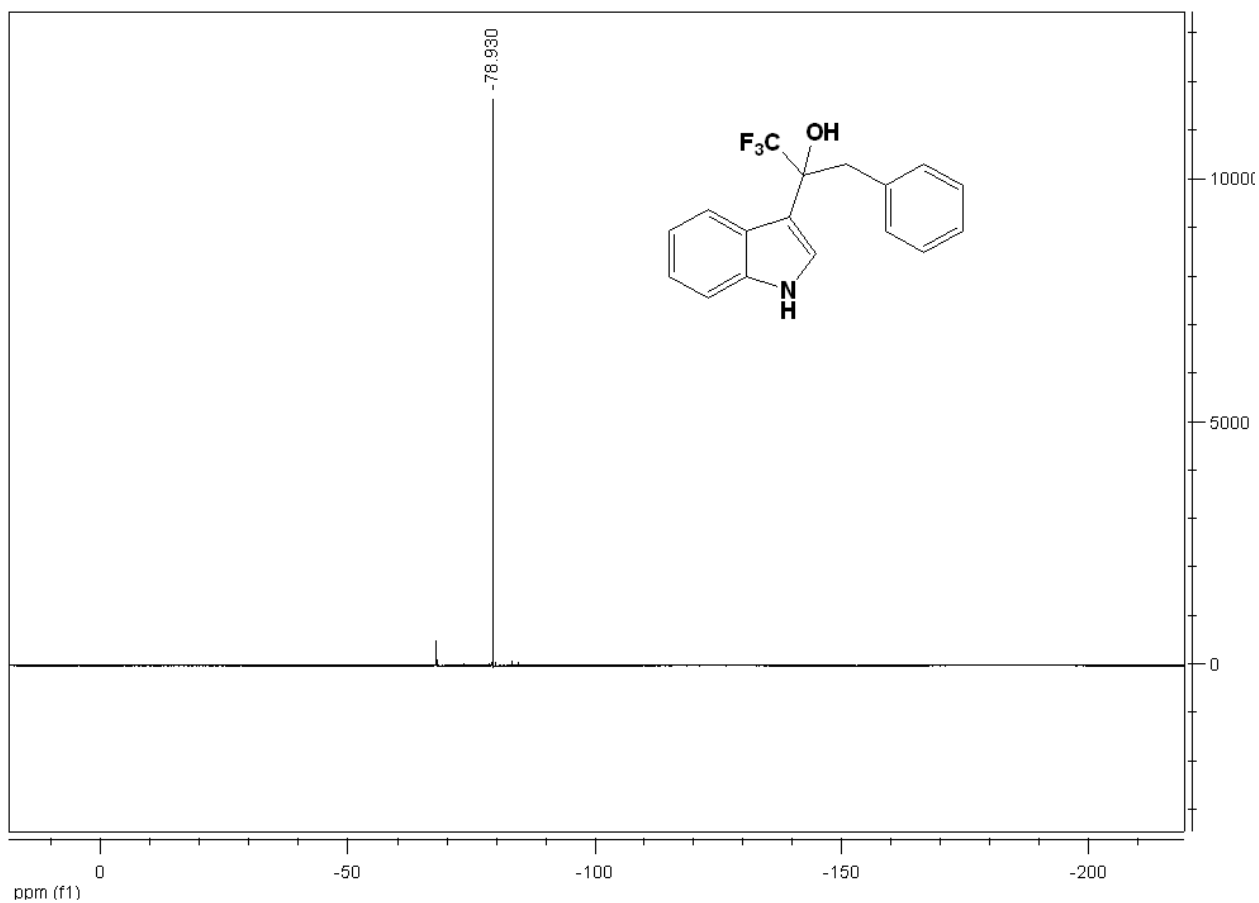

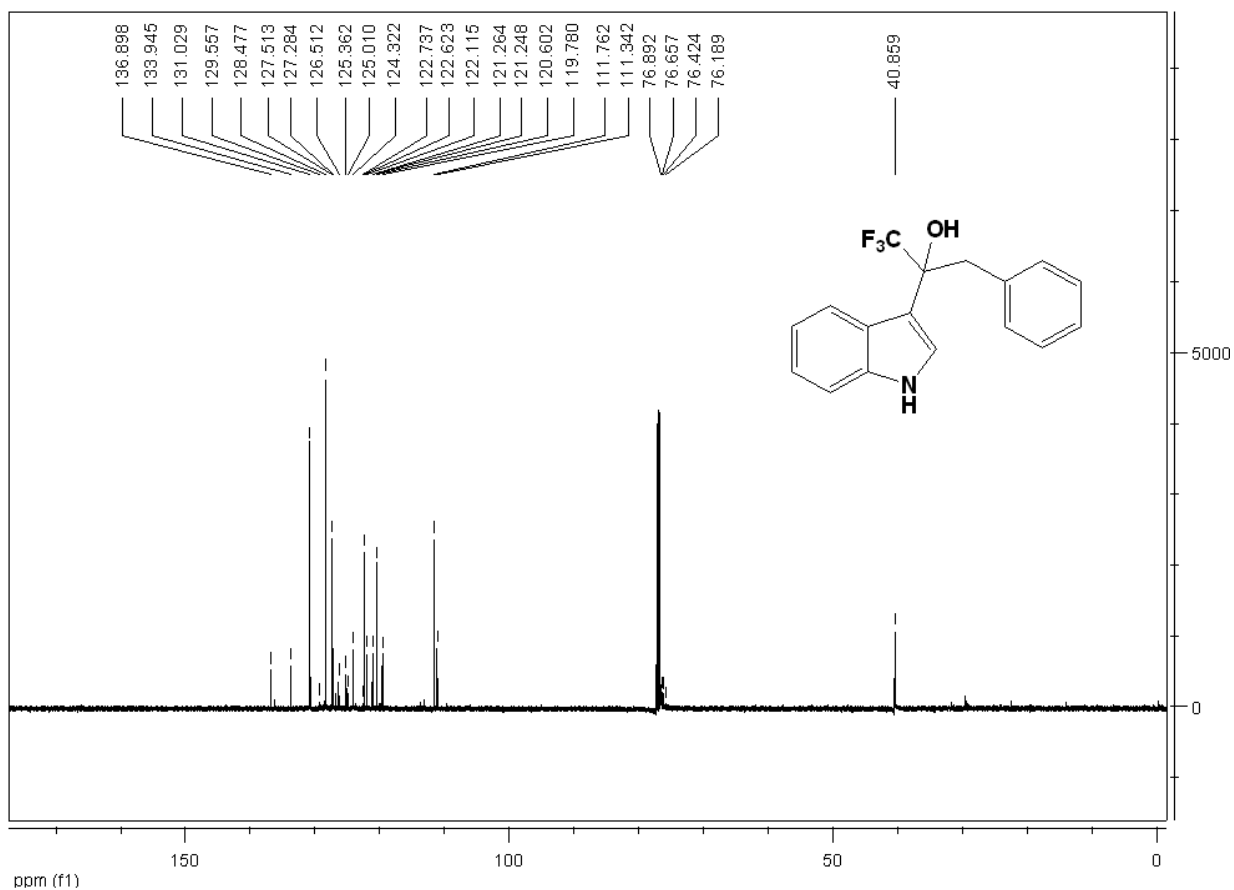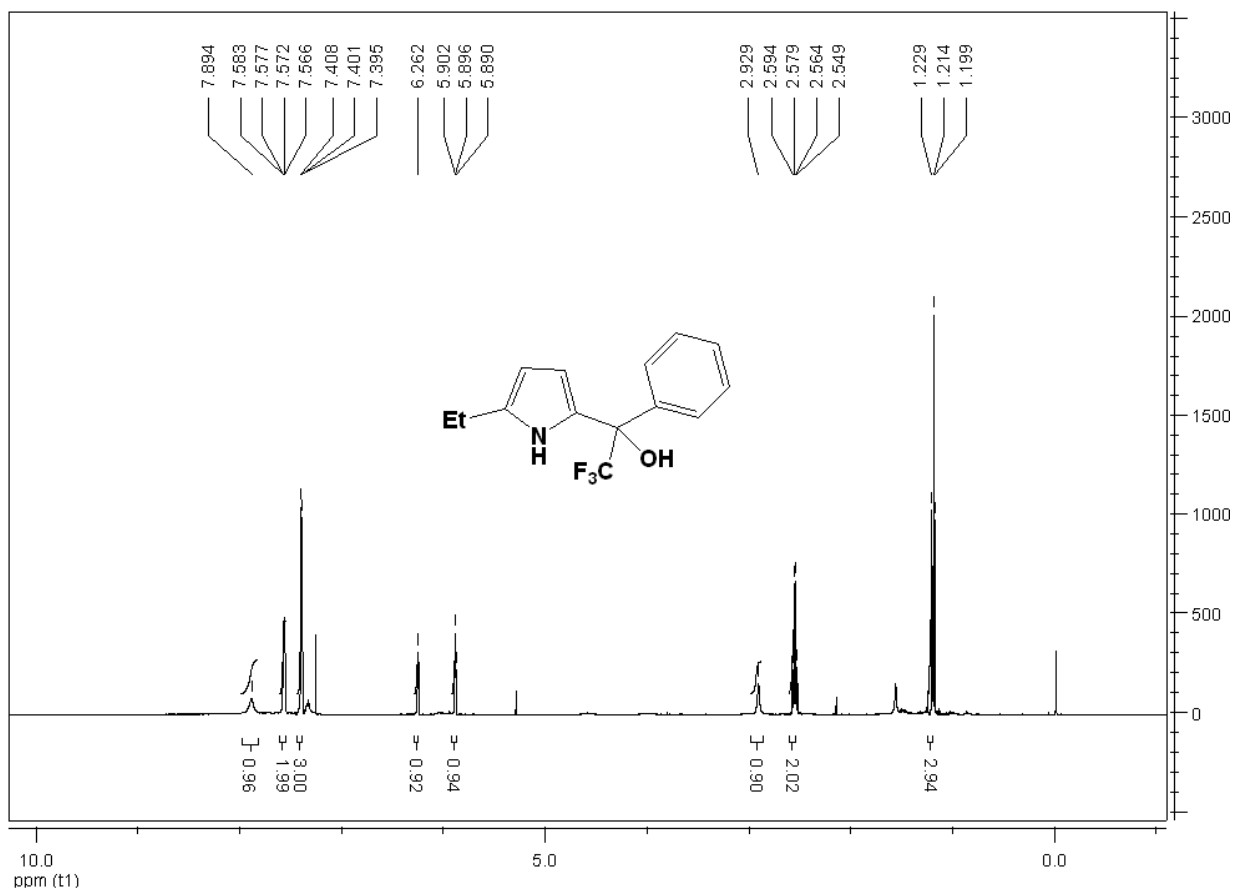

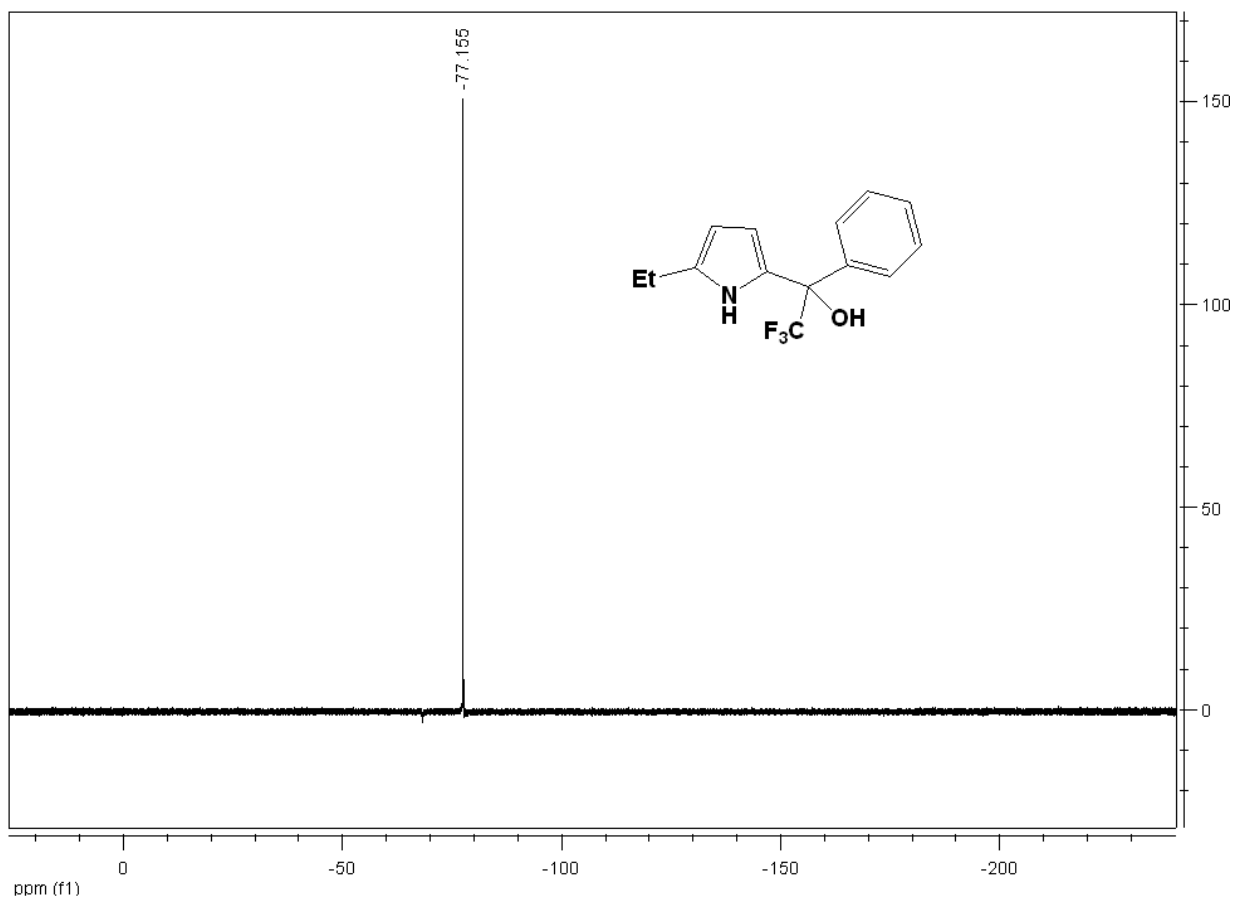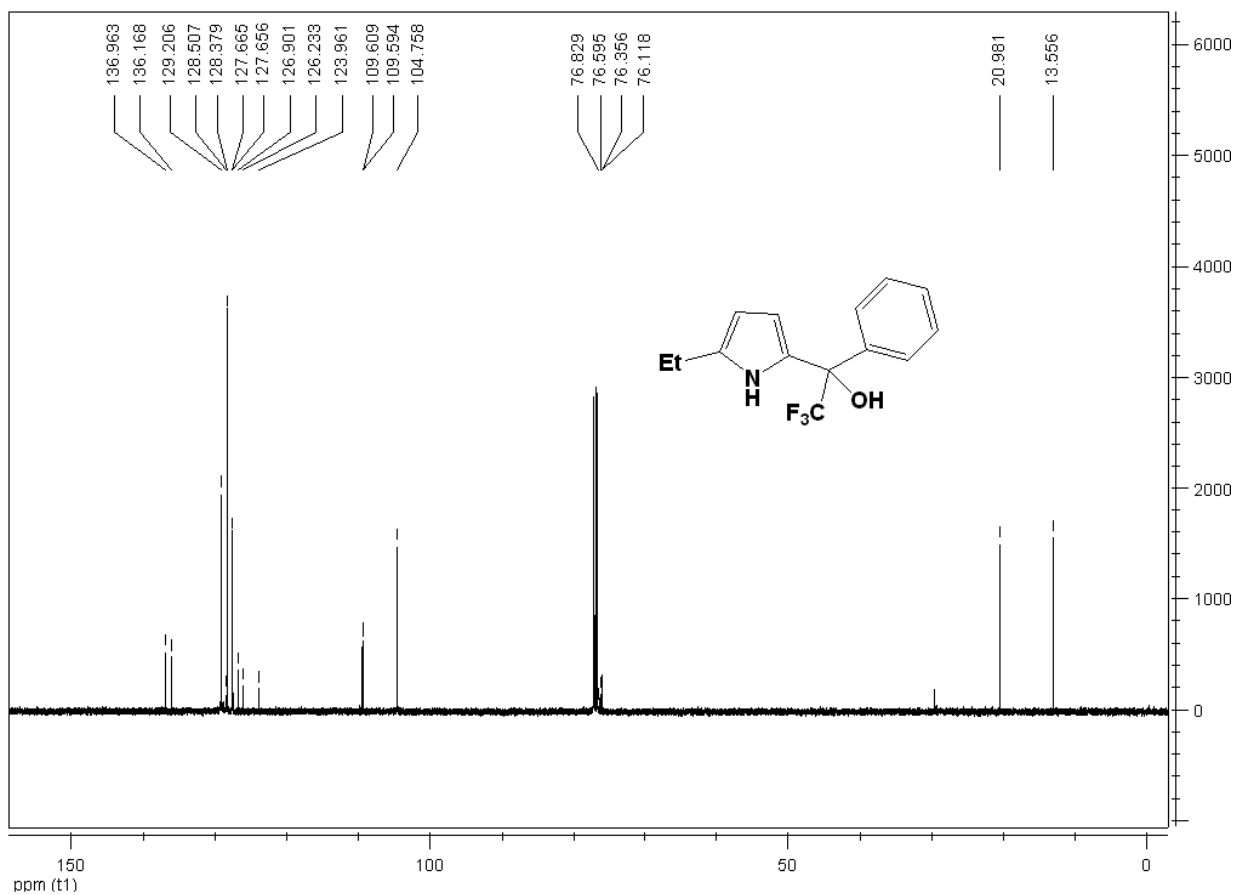

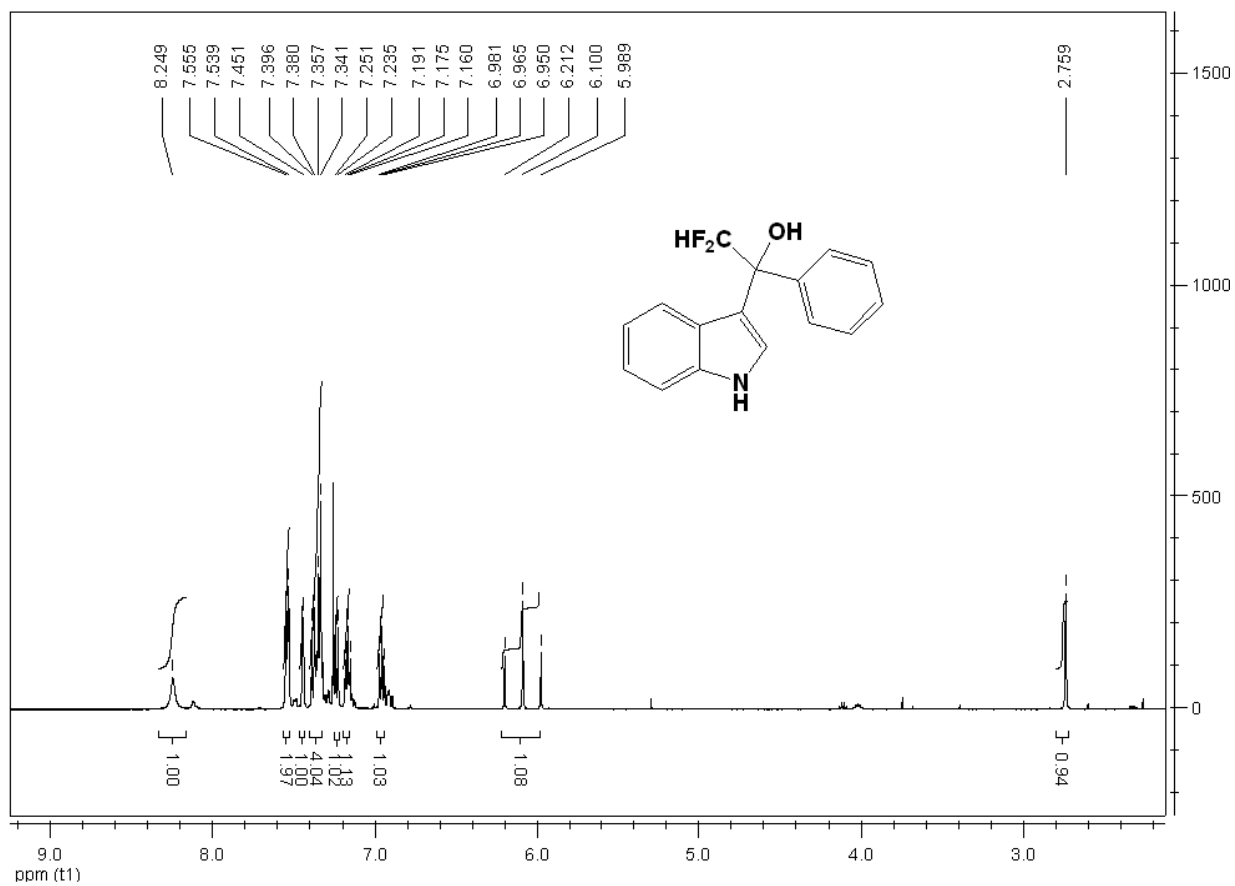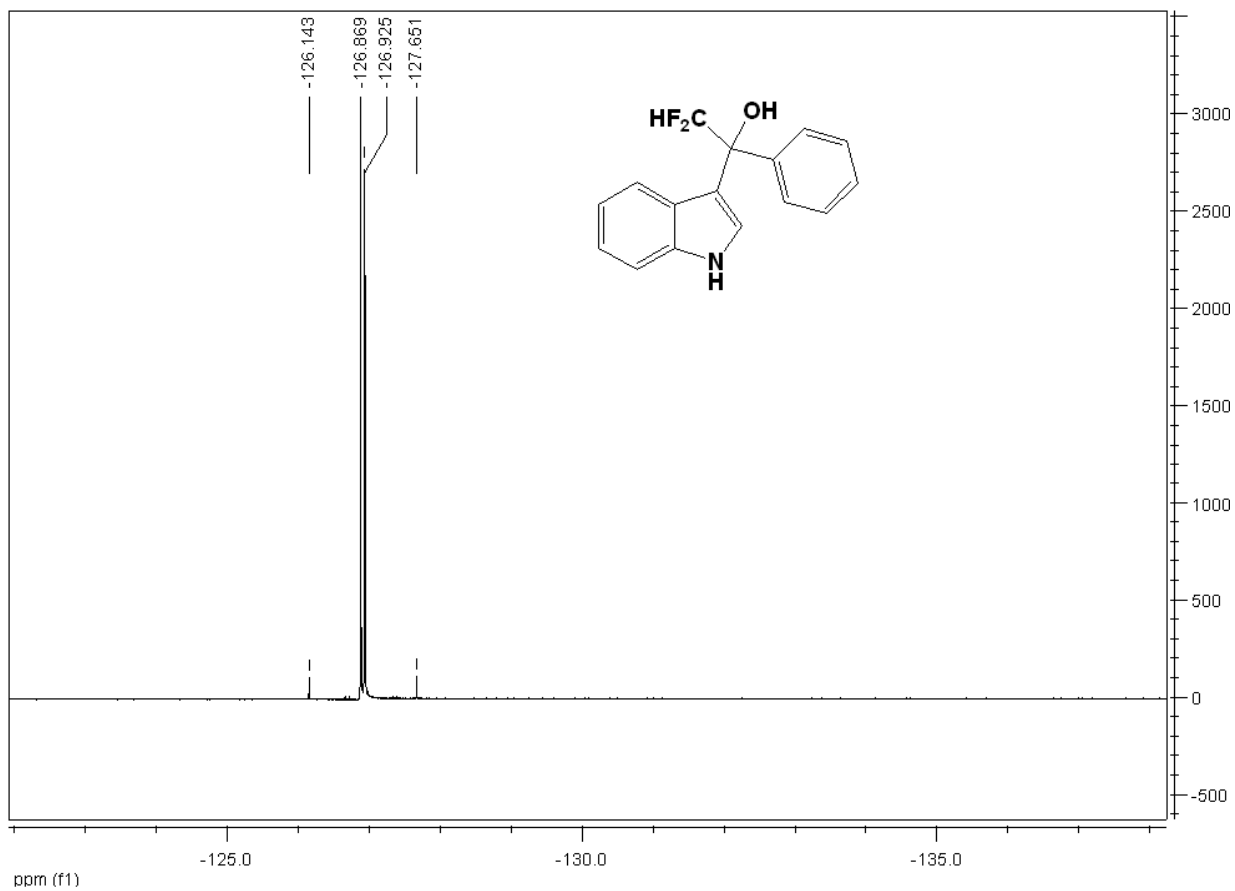

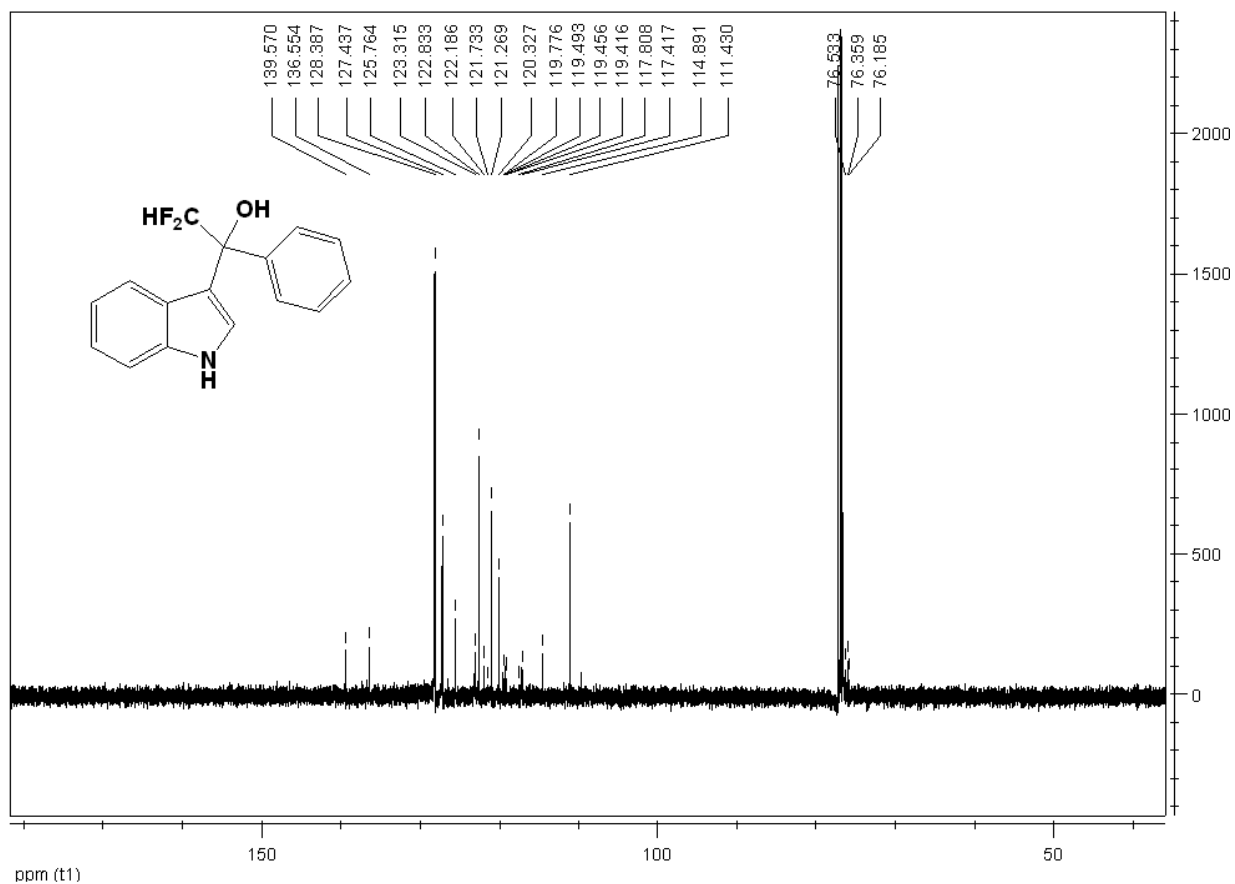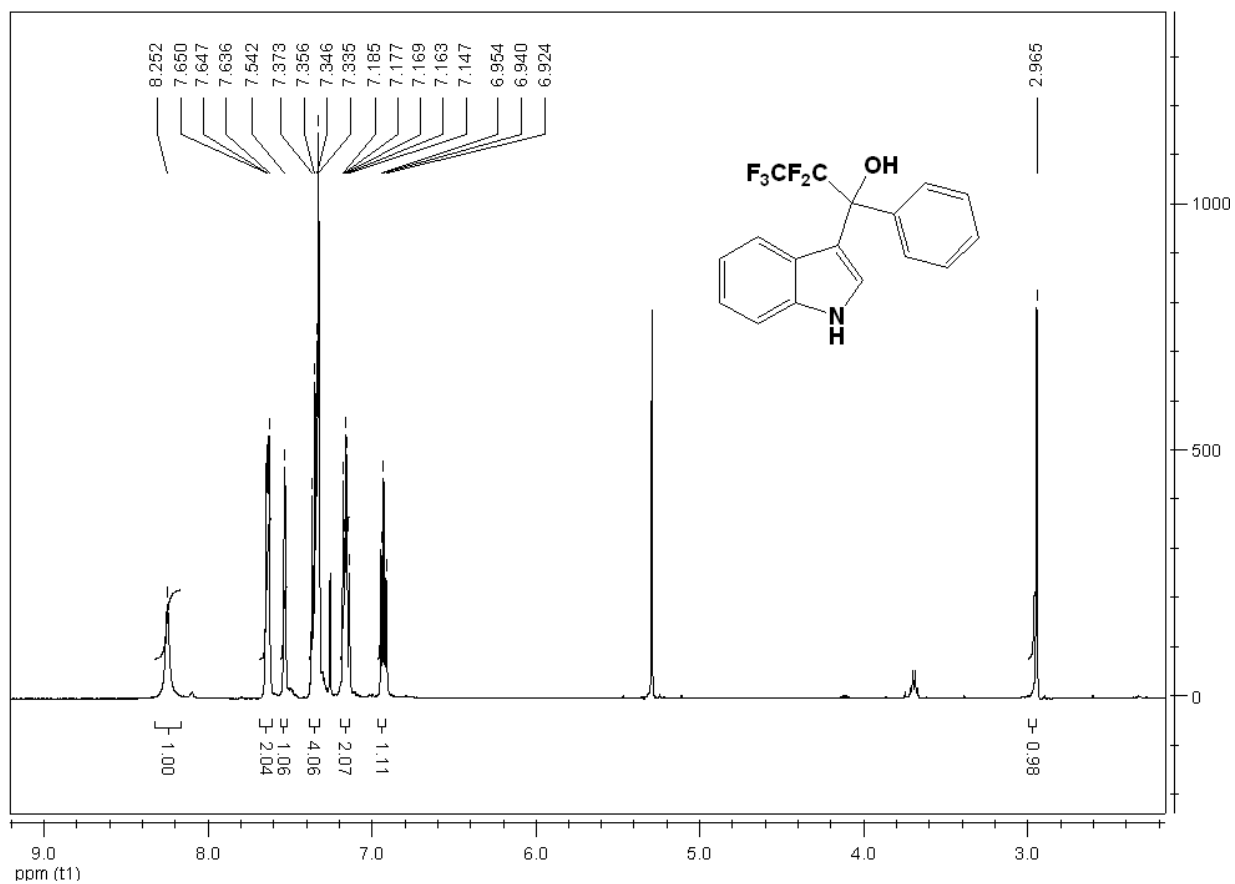



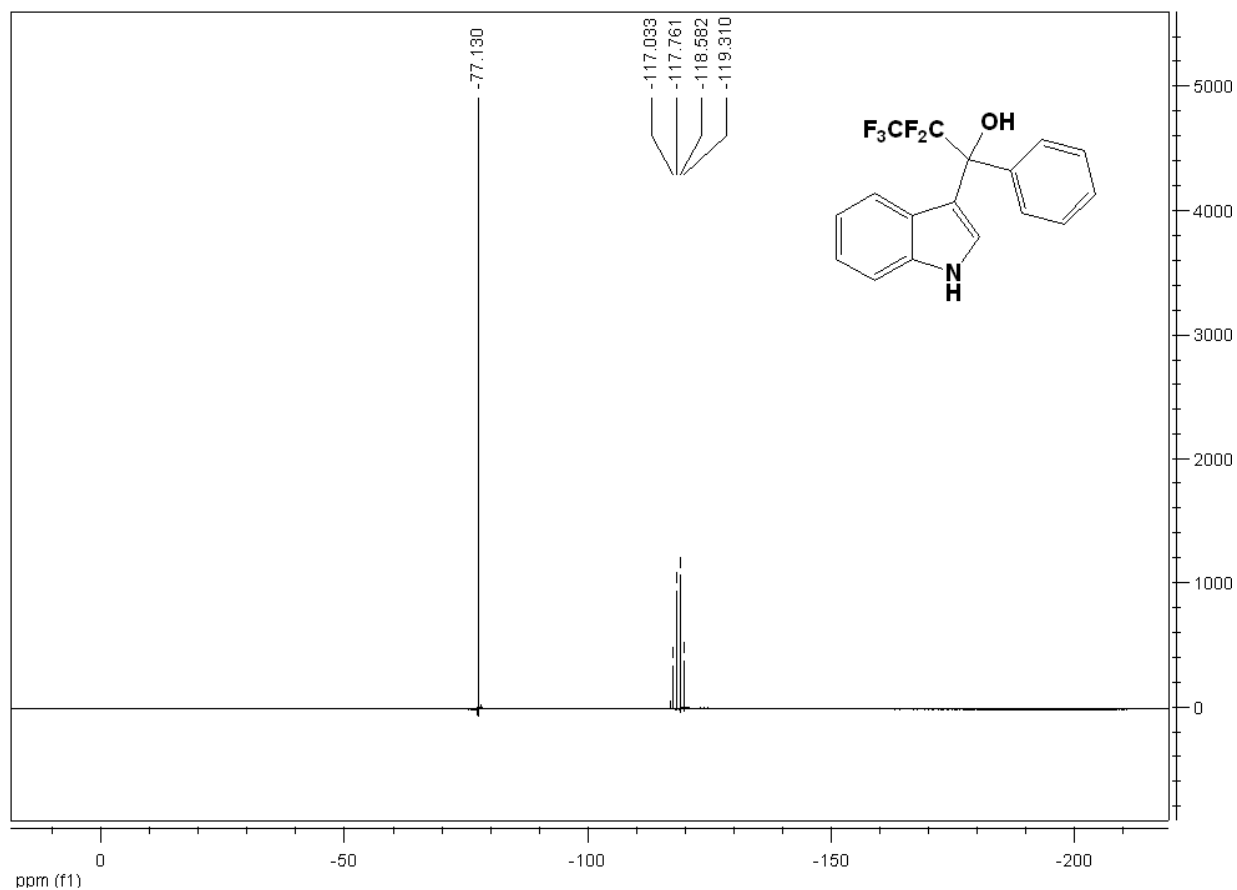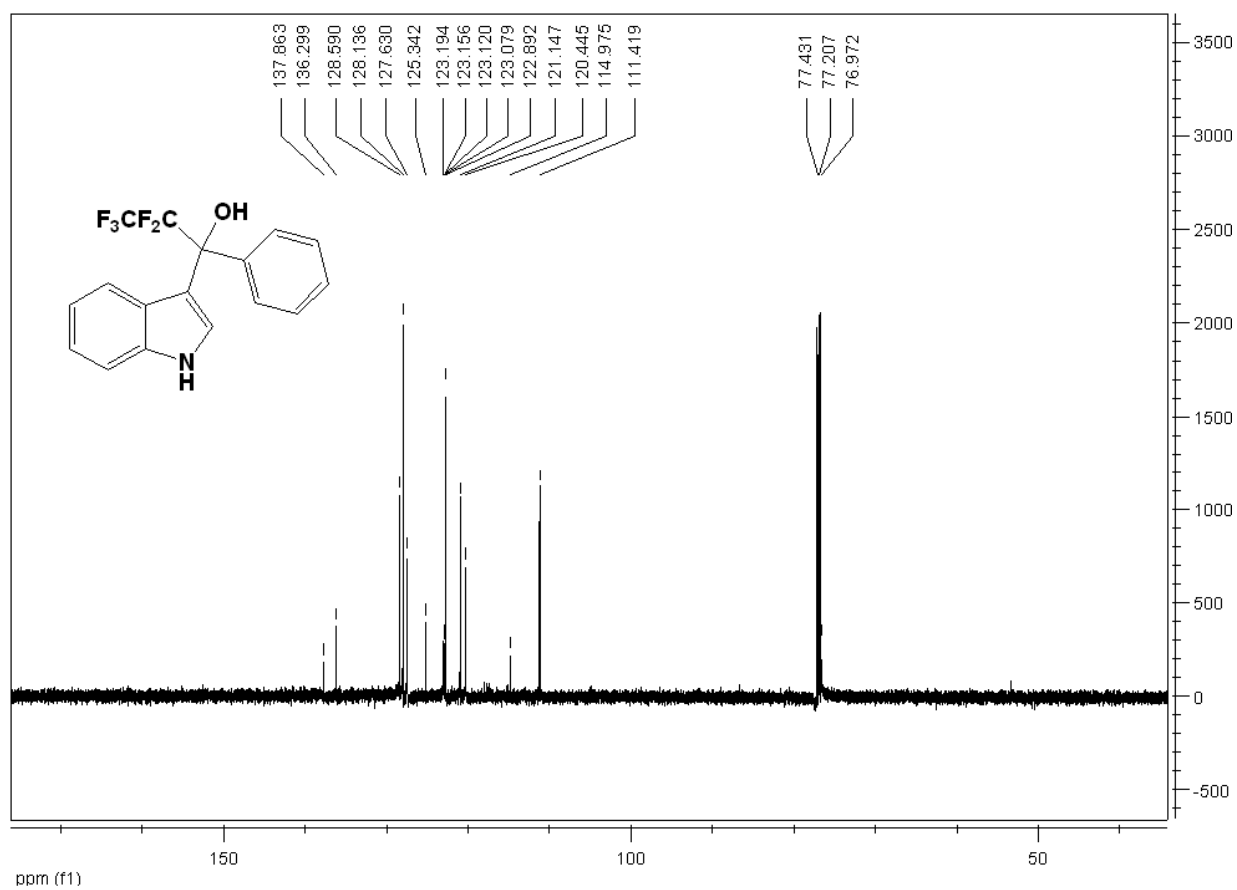

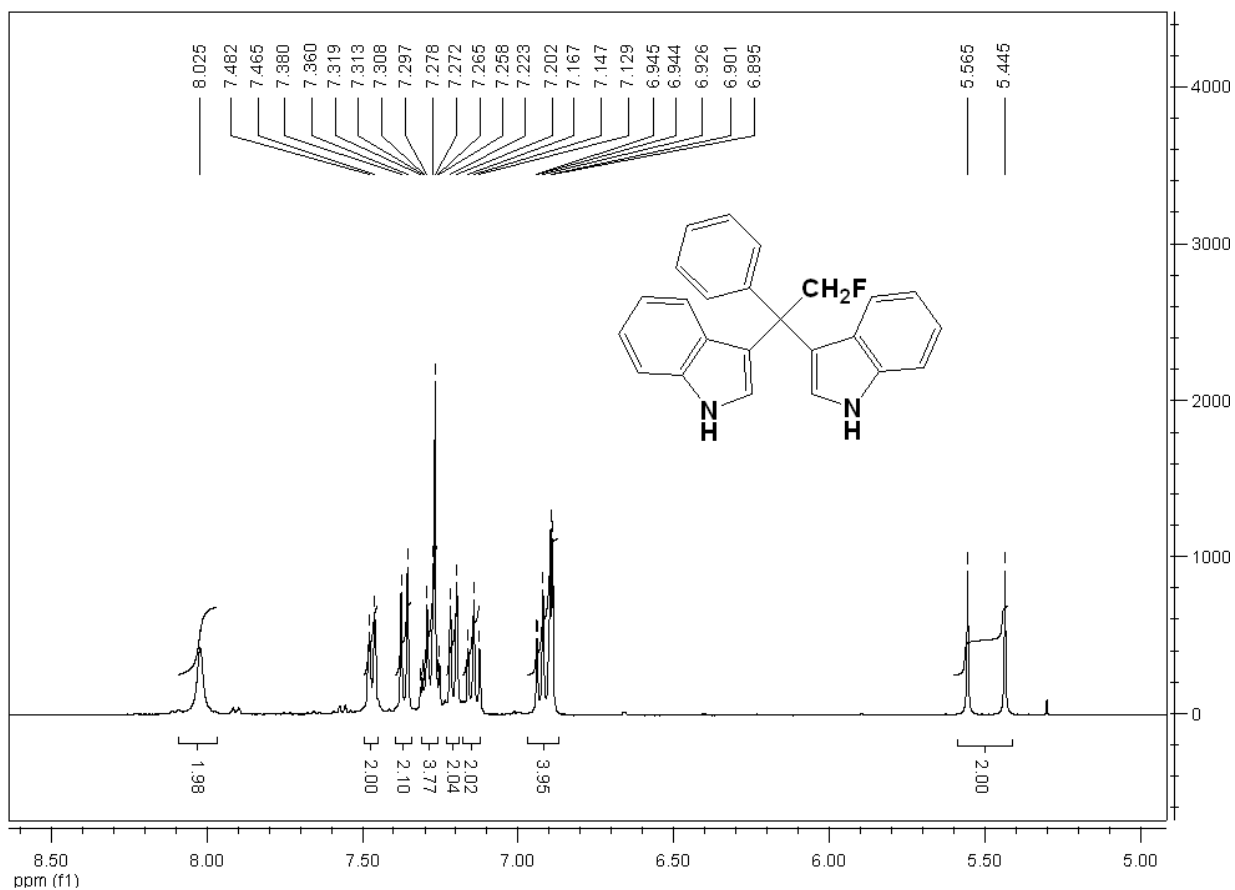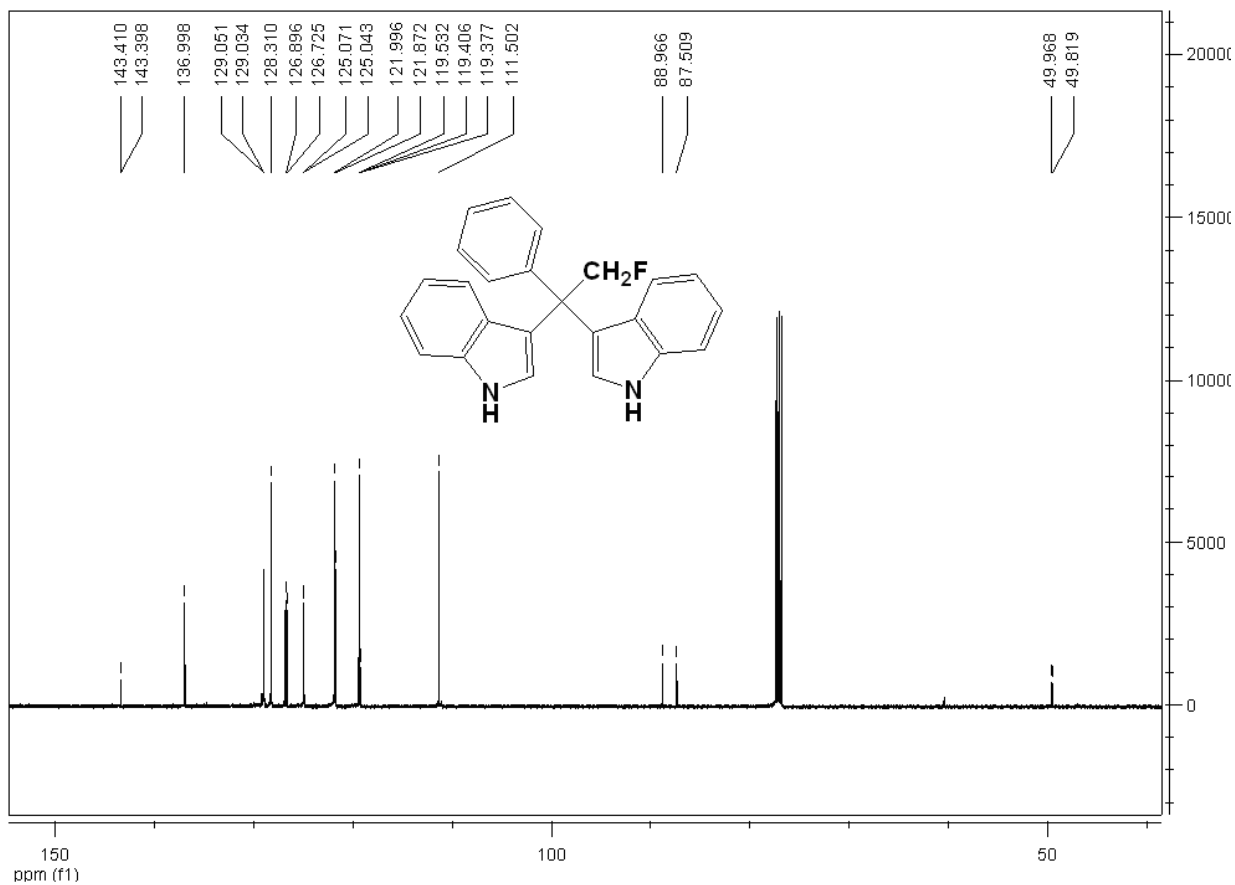

Sample Info : 254nm,0D-H,i-PrOH:Hexane=20:80,0.8mL/min

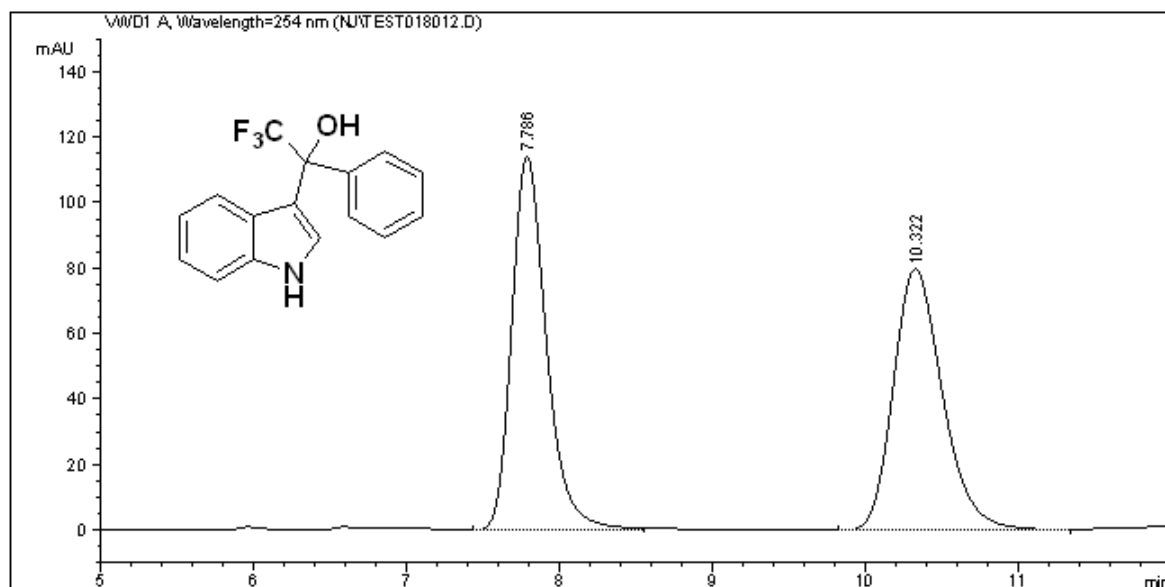

Signal 1: VWD1 A, Wavelength=254 nm

| Peak # | RetTime [min] | Type | Width [min] | Area mAU *s | Height [mAU] | Area %  |
|--------|---------------|------|-------------|-------------|--------------|---------|
| 1      | 7.786         | VV   | 0.2428      | 1810.39587  | 114.44141    | 50.1359 |
| 2      | 10.322        | VV   | 0.3470      | 1800.57776  | 80.01328     | 49.8641 |

Totals : 3610.97363 194.45468

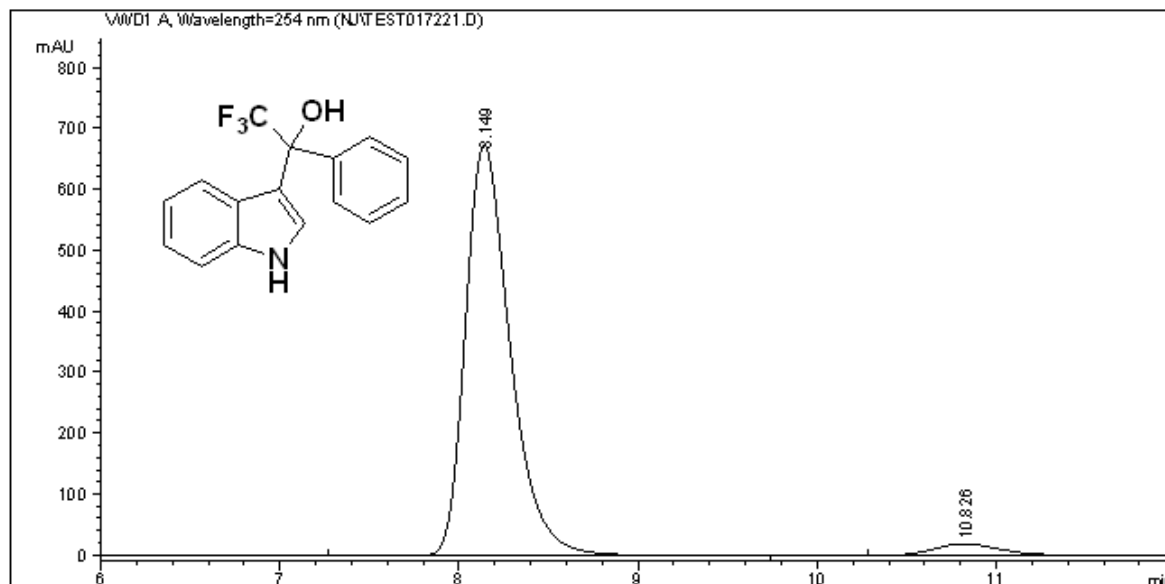

Signal 1: VWD1 A, Wavelength=254 nm

| Peak # | RetTime [min] | Type | Width [min] | Area mAU *s | Height [mAU] | Area %  |
|--------|---------------|------|-------------|-------------|--------------|---------|
| 1      | 8.149         | VB   | 0.3006      | 1.17232e4   | 659.35413    | 95.8072 |
| 2      | 10.826        | BB   | 0.4322      | 513.03882   | 18.95854     | 4.1928  |

Totals : 1.22363e4 678.31267

Sample Info : 254nm,0D-H,i-PrOH:Hexane=20:80,0.8mL/min

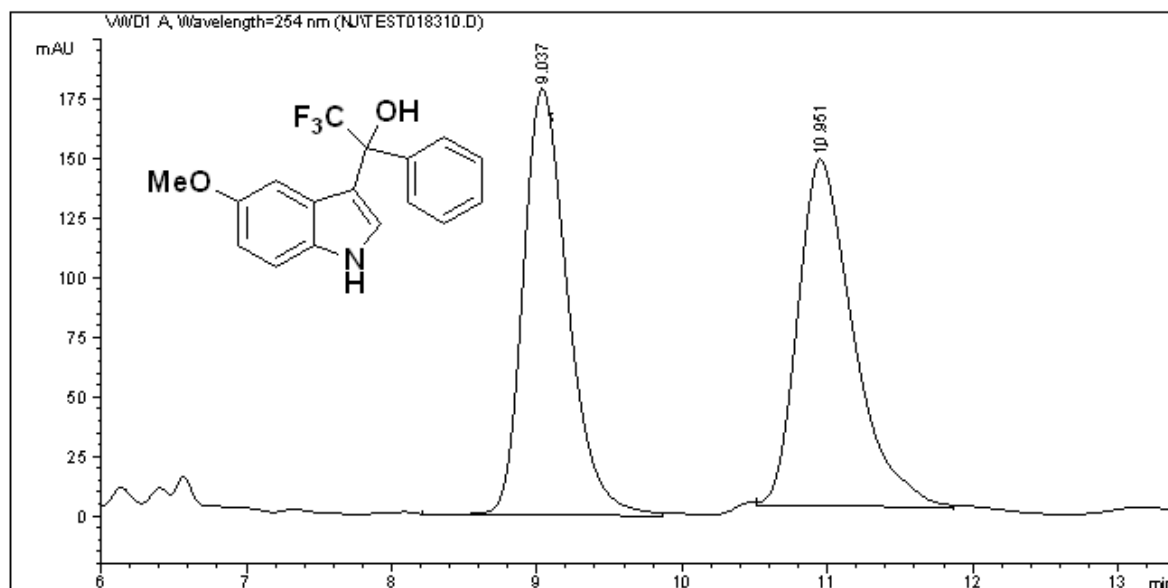

Signal 1: VWD1 A, Wavelength=254 nm

| Peak # | RetTime [min] | Type | Width [min] | Area mAU *s | Height [mAU] | Area %  |
|--------|---------------|------|-------------|-------------|--------------|---------|
| 1      | 9.037         | MM   | 0.3555      | 3815.95581  | 178.91862    | 49.7937 |
| 2      | 10.951        | MM   | 0.4407      | 3847.57178  | 145.51312    | 50.2063 |

Totals : 7663.52759 324.43175

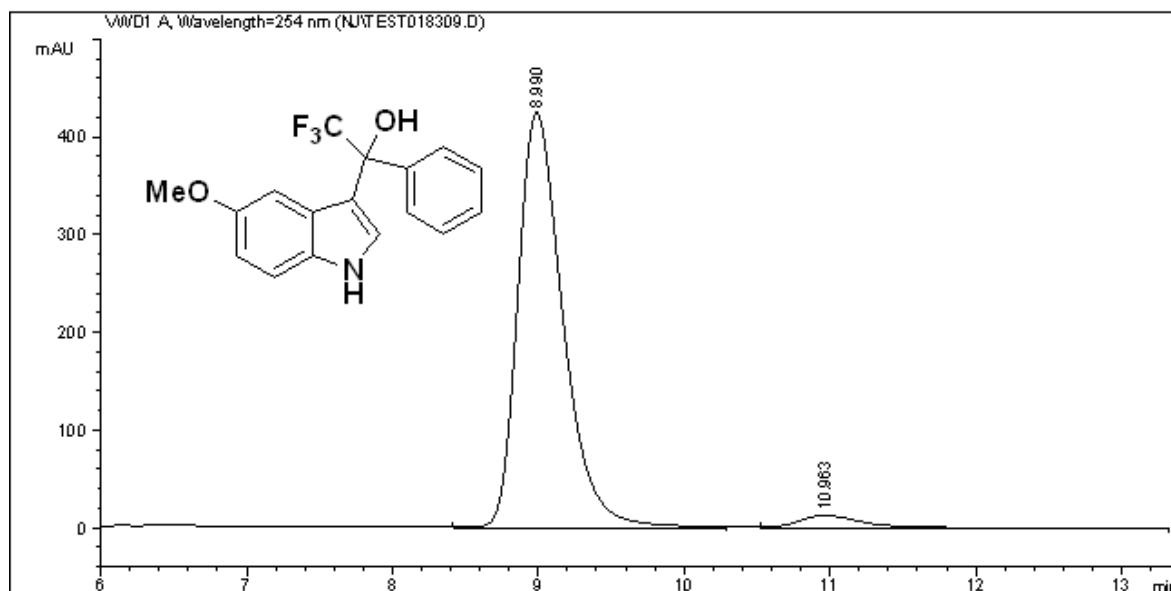

Signal 1: VWD1 A, Wavelength=254 nm

| Peak # | RetTime [min] | Type | Width [min] | Area mAU *s | Height [mAU] | Area %  |
|--------|---------------|------|-------------|-------------|--------------|---------|
| 1      | 8.990         | VV   | 0.3335      | 9164.09375  | 424.37775    | 95.7187 |
| 2      | 10.963        | VBA  | 0.4885      | 409.88623   | 12.65743     | 4.2813  |

Totals : 9573.97998 437.03518

Sample Info : 254nm,0D-H,i-PrOH:Hexane=2:98,1.0mL/min

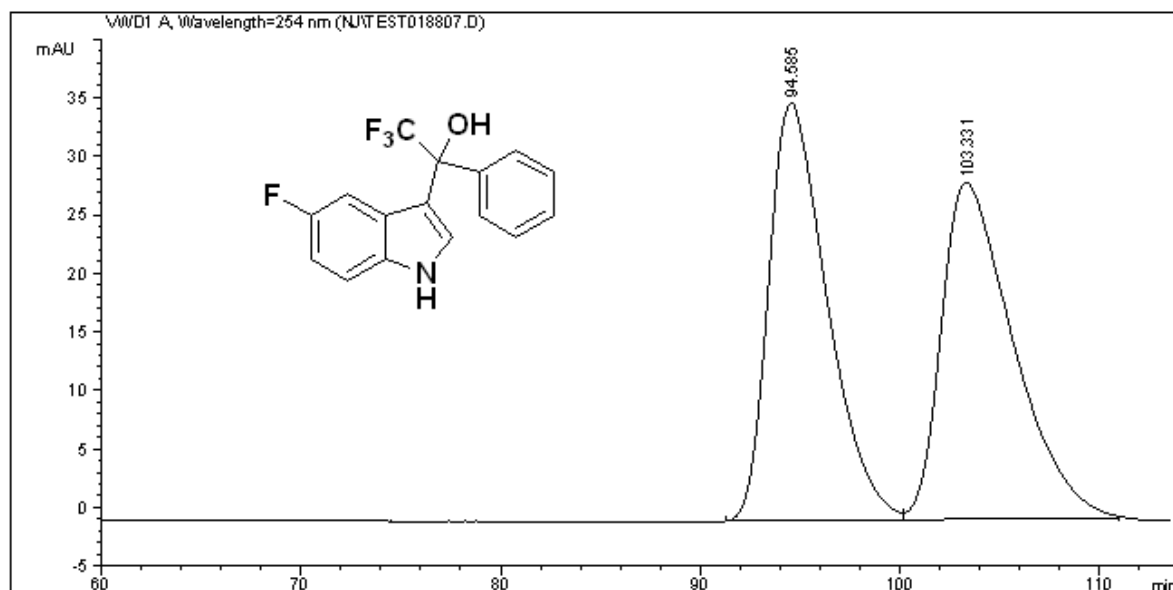

Signal 1: VWD1 A, Wavelength=254 nm

| Peak # | RetTime [min] | Type | Width [min] | Area mAU *s | Height [mAU] | Area %  |
|--------|---------------|------|-------------|-------------|--------------|---------|
| 1      | 94.585        | BB   | 2.8646      | 7259.76318  | 35.74360     | 50.1971 |
| 2      | 103.331       | BB   | 3.3302      | 7202.76123  | 28.75344     | 49.8029 |

Totals : 1.44625e4 64.49703

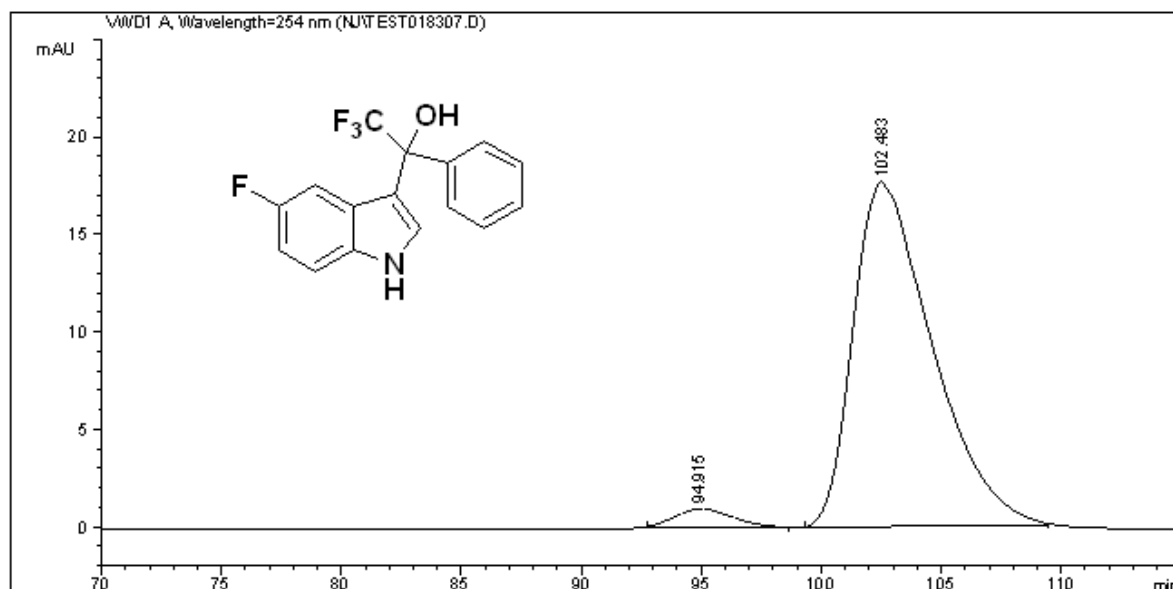

Signal 1: VWD1 A, Wavelength=254 nm

| Peak # | RetTime [min] | Type | Width [min] | Area mAU *s | Height [mAU] | Area %  |
|--------|---------------|------|-------------|-------------|--------------|---------|
| 1      | 94.915        | BB   | 1.9876      | 158.11581   | 9.39091e-1   | 3.7600  |
| 2      | 102.483       | BB   | 2.8178      | 4047.04053  | 17.70761     | 96.2400 |

Totals : 4205.15634 18.64670

Sample Info : 254nm,AD-H,i-PrOH:Hexane=5:95,1.0mL/min

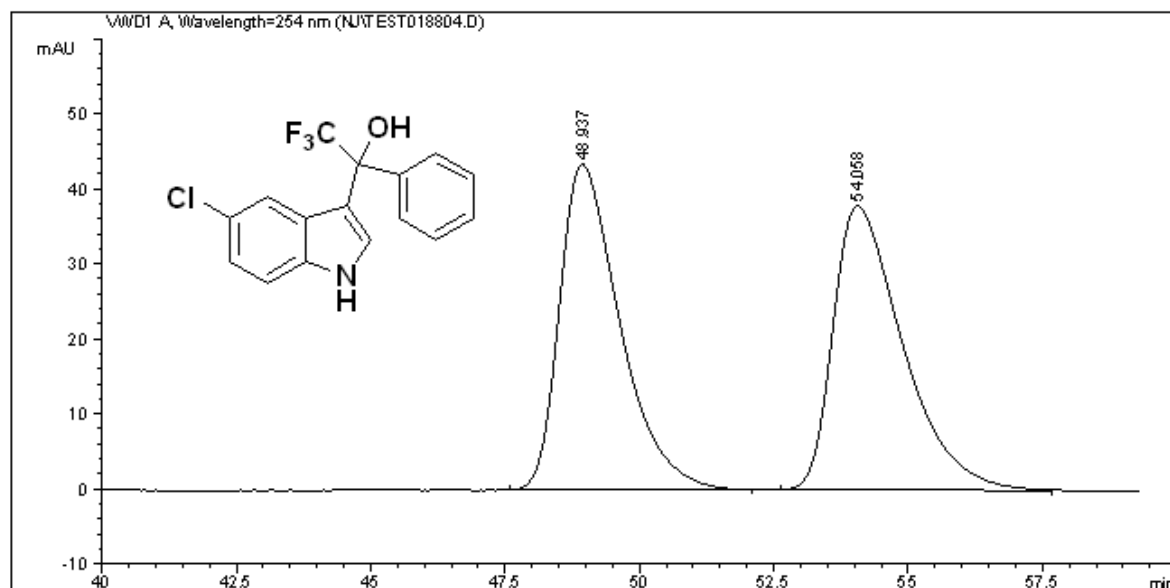

Signal 1: VWD1 A, Wavelength=254 nm

| Peak # | RetTime [min] | Type | Width [min] | Area mAU *s | Height [mAU] | Area %  |
|--------|---------------|------|-------------|-------------|--------------|---------|
| 1      | 48.937        | BB   | 1.1865      | 3400.85571  | 43.46859     | 49.8551 |
| 2      | 54.058        | BB   | 1.3614      | 3420.62476  | 37.90794     | 50.1449 |

Totals : 6821.48047 81.37653

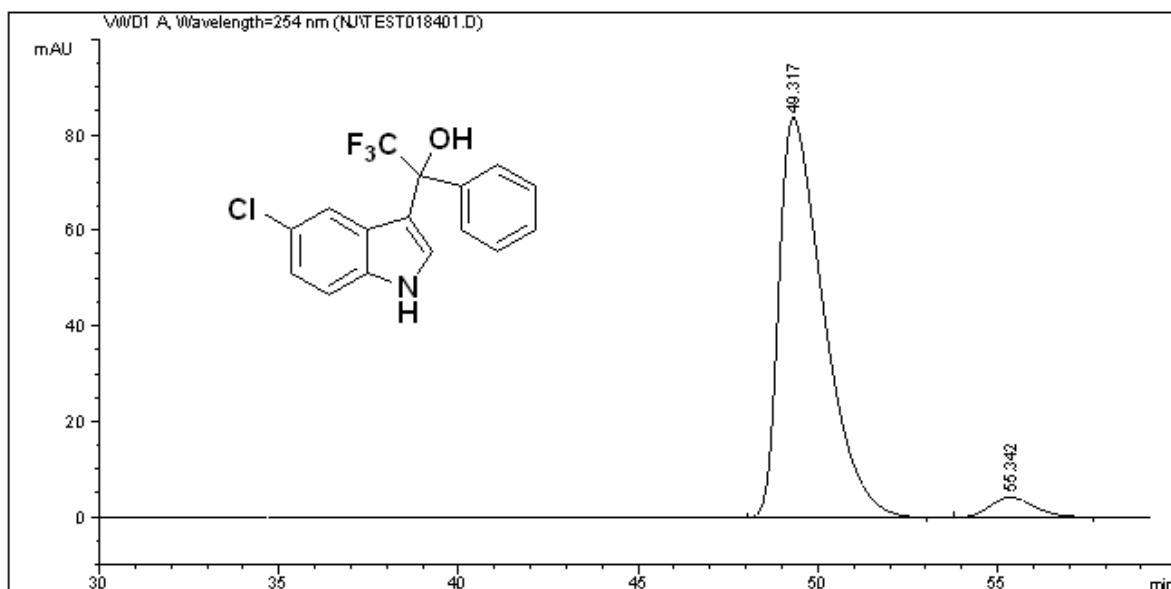

Signal 1: VWD1 A, Wavelength=254 nm

| Peak # | RetTime [min] | Type | Width [min] | Area mAU *s | Height [mAU] | Area %  |
|--------|---------------|------|-------------|-------------|--------------|---------|
| 1      | 49.317        | BB   | 1.2895      | 7227.47314  | 83.73340     | 95.0381 |
| 2      | 55.342        | BB   | 1.2746      | 377.34332   | 4.28636      | 4.9619  |

Totals : 7604.81647 88.01976

Sample Info : 254nm,OD-H,i-PrOH:Hexane=2:98,1.0mL/min

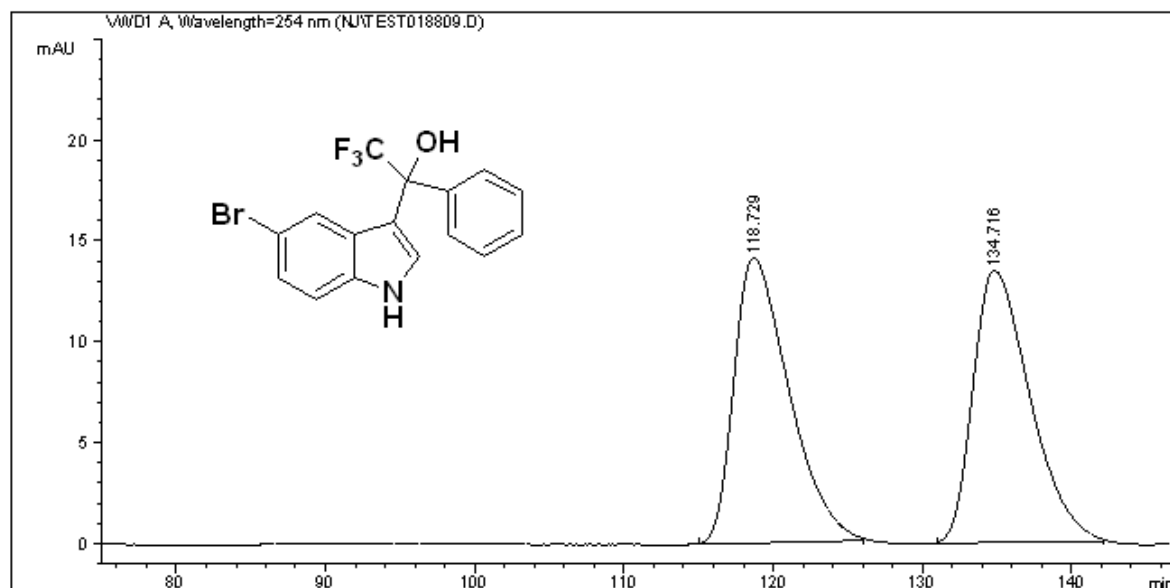

Signal 1: VWD1 A, Wavelength=254 nm

| Peak #   | RetTime [min] | Type | Width [min] | Area mAU *s | Height [mAU] | Area %  |
|----------|---------------|------|-------------|-------------|--------------|---------|
| 1        | 118.729       | BB   | 3.1485      | 3635.73804  | 14.09794     | 50.3694 |
| 2        | 134.716       | BB   | 3.2216      | 3582.40942  | 13.46014     | 49.6306 |
| Totals : |               |      |             | 7218.14746  | 27.55807     |         |

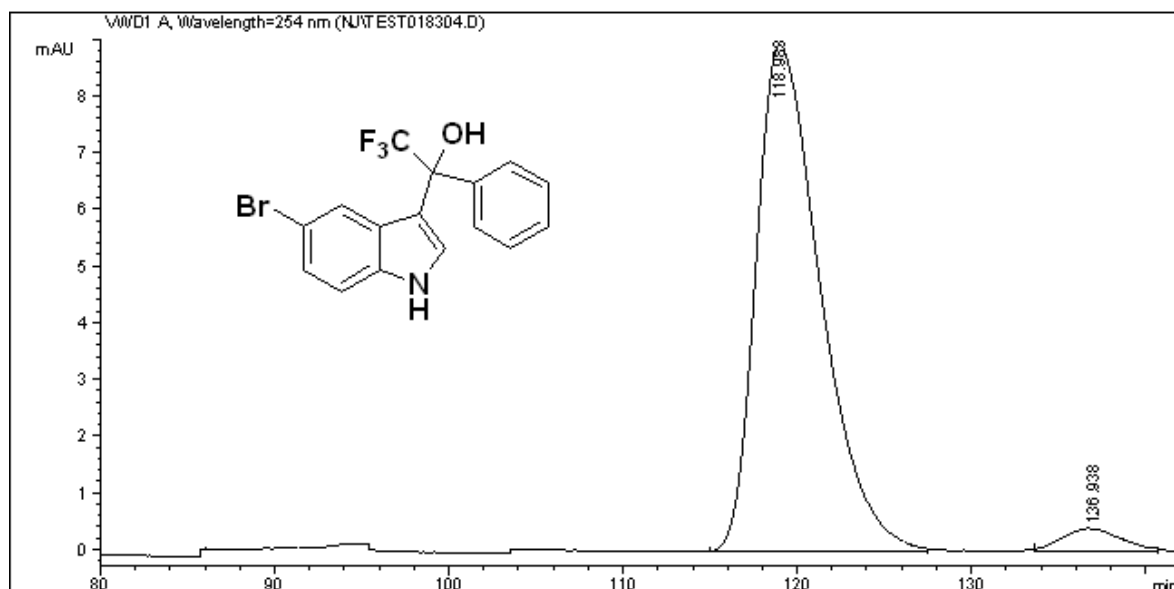

Signal 1: VWD1 A, Wavelength=254 nm

| Peak #   | RetTime [min] | Type | Width [min] | Area mAU *s | Height [mAU] | Area %  |
|----------|---------------|------|-------------|-------------|--------------|---------|
| 1        | 118.983       | MM   | 4.2706      | 2289.06714  | 8.93337      | 96.0350 |
| 2        | 136.938       | MM   | 3.8482      | 94.50867    | 4.09322e-1   | 3.9650  |
| Totals : |               |      |             | 2383.57581  | 9.34269      |         |

Sample Info : 254nm,AD-H,i-PrOH:Hexane=10:90,1.0mL/min

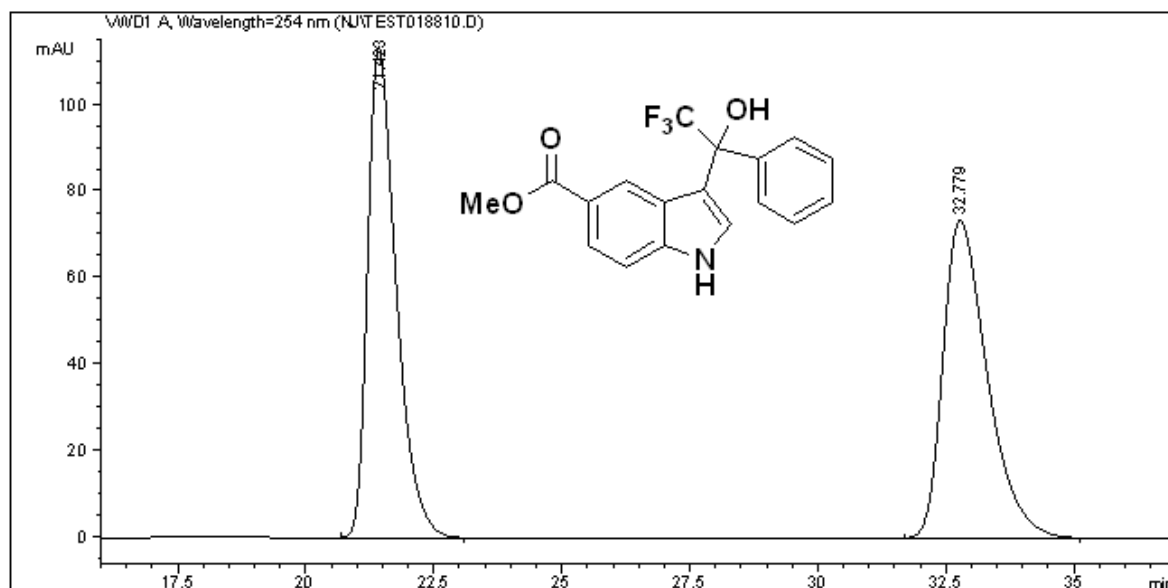

Signal 1: VWD1 A, Wavelength=254 nm

| Peak # | RetTime [min] | Type | Width [min] | Area mAU *s | Height [mAU] | Area %  |
|--------|---------------|------|-------------|-------------|--------------|---------|
| 1      | 21.423        | BB   | 0.5898      | 4402.53662  | 113.40026    | 49.9024 |
| 2      | 32.779        | BB   | 0.9184      | 4419.75098  | 73.50591     | 50.0976 |

Totals : 8822.28760 186.90617

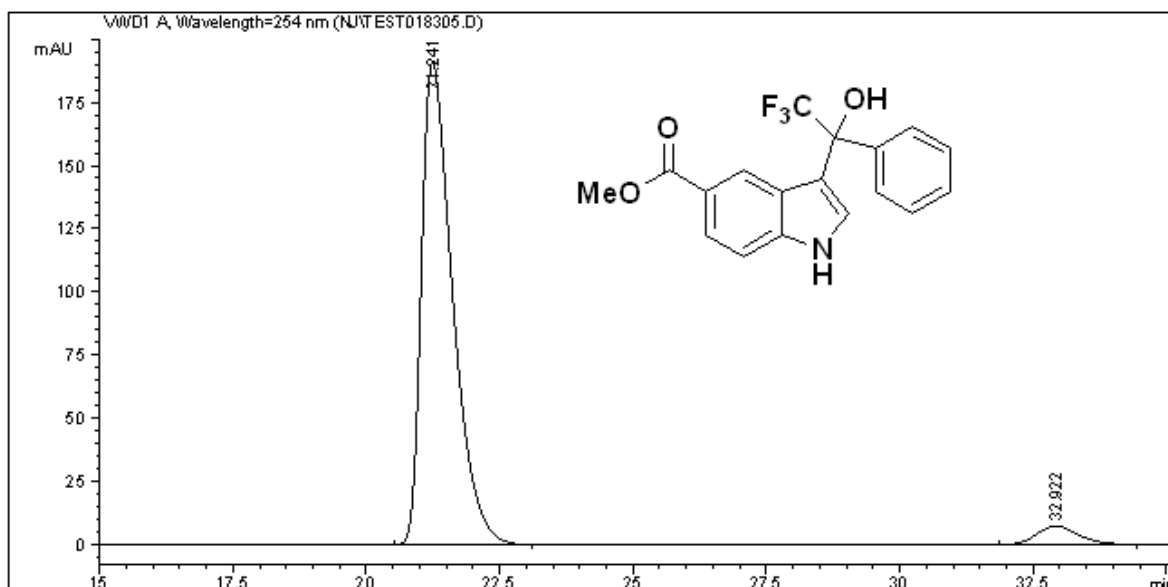

Signal 1: VWD1 A, Wavelength=254 nm

| Peak # | RetTime [min] | Type | Width [min] | Area mAU *s | Height [mAU] | Area %  |
|--------|---------------|------|-------------|-------------|--------------|---------|
| 1      | 21.241        | BB   | 0.6188      | 7748.64600  | 191.05151    | 94.8510 |
| 2      | 32.922        | BB   | 0.8787      | 420.63800   | 7.39954      | 5.1490  |

Totals : 8169.28400 198.45105



Sample Info : 254nm,OD-H,i-PrOH:Hexane=2:98,1.0mL/min

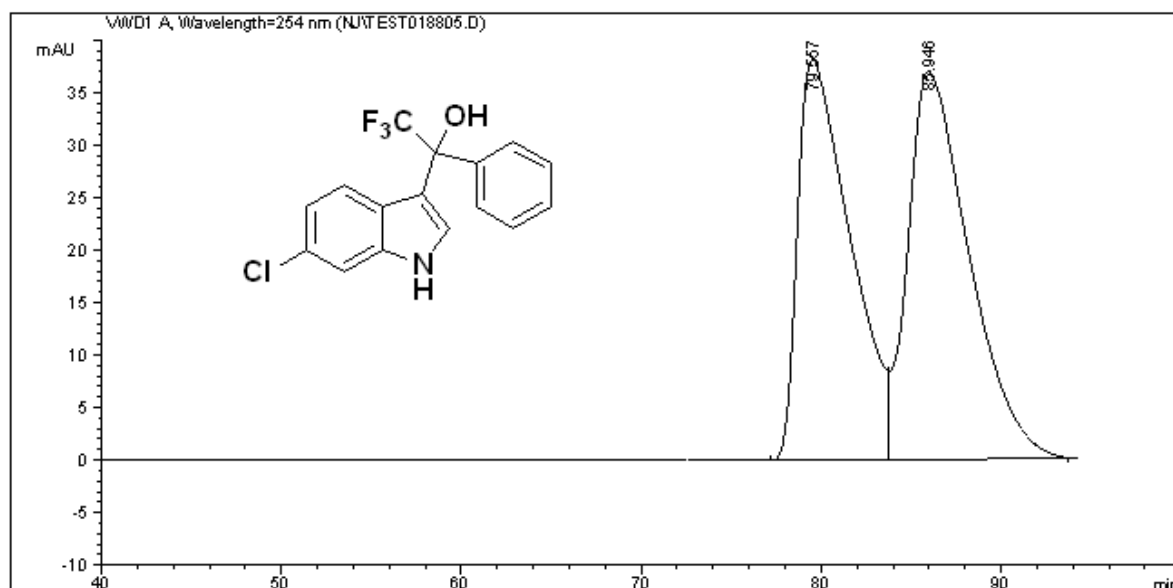

Signal 1: VWD1 A, Wavelength=254 nm

| Peak #   | RetTime [min] | Type | Width [min] | Area mAU *s | Height [mAU] | Area %  |
|----------|---------------|------|-------------|-------------|--------------|---------|
| 1        | 79.557        | BV   | 2.7452      | 7778.99170  | 38.25350     | 47.1074 |
| 2        | 85.946        | VB   | 3.1886      | 8734.32227  | 36.99137     | 52.8926 |
| Totals : |               |      |             | 1.65133e4   | 75.24488     |         |

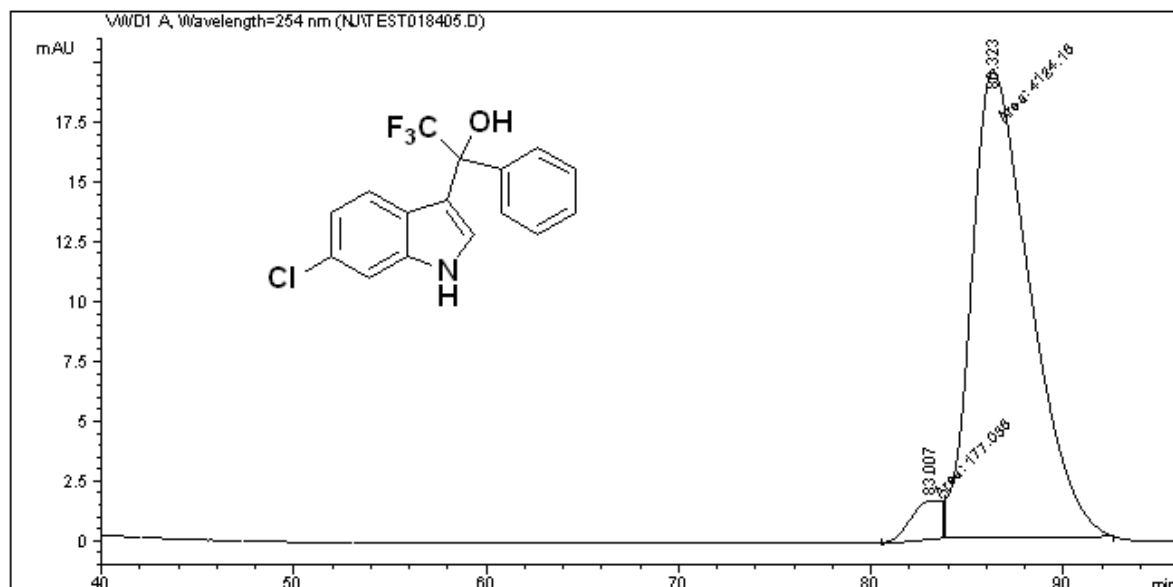

Signal 1: VWD1 A, Wavelength=254 nm

| Peak #   | RetTime [min] | Type | Width [min] | Area mAU *s | Height [mAU] | Area %  |
|----------|---------------|------|-------------|-------------|--------------|---------|
| 1        | 83.007        | MM T | 1.8259      | 177.03844   | 1.61596      | 4.1160  |
| 2        | 86.323        | MP   | 3.5138      | 4124.16455  | 19.56188     | 95.8840 |
| Totals : |               |      |             | 4301.20299  | 21.17783     |         |

Sample Info : 254nm,OD-H<sub>2</sub>O:i-PrOH:Hexane=20:80,0.8mL/min

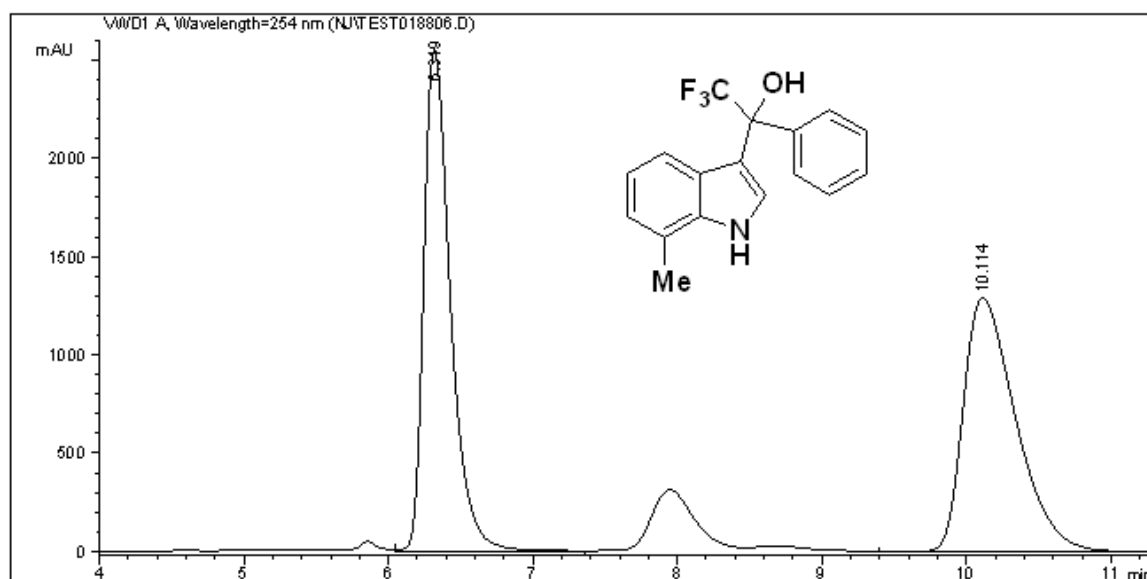

Signal 1: VWD1 A, Wavelength=254 nm

| Peak # | RetTime [min] | Type | Width [min] | Area mAU *s | Height [mAU] | Area %  |
|--------|---------------|------|-------------|-------------|--------------|---------|
| 1      | 6.319         | VV   | 0.1970      | 3.28824e4   | 2550.74121   | 50.2815 |
| 2      | 10.114        | VBA  | 0.3870      | 3.25142e4   | 1291.09583   | 49.7185 |

Totals : 6.53965e4 3841.83704

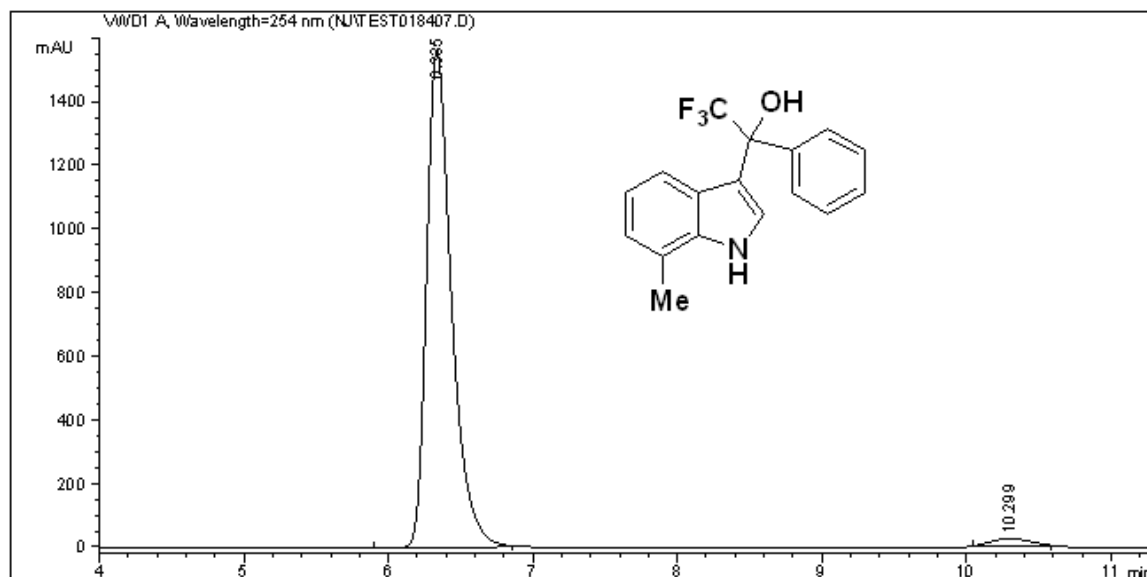

Signal 1: VWD1 A, Wavelength=254 nm

| Peak # | RetTime [min] | Type | Width [min] | Area mAU *s | Height [mAU] | Area %  |
|--------|---------------|------|-------------|-------------|--------------|---------|
| 1      | 6.335         | MM   | 0.1993      | 1.87806e4   | 1570.64319   | 97.2837 |
| 2      | 10.299        | MM   | 0.3329      | 524.37408   | 26.25392     | 2.7163  |

Totals : 1.93050e4 1596.89711

Sample Info : 254nm,0D-H,i-PrOH:Hexane=10:90,1.0mL/min

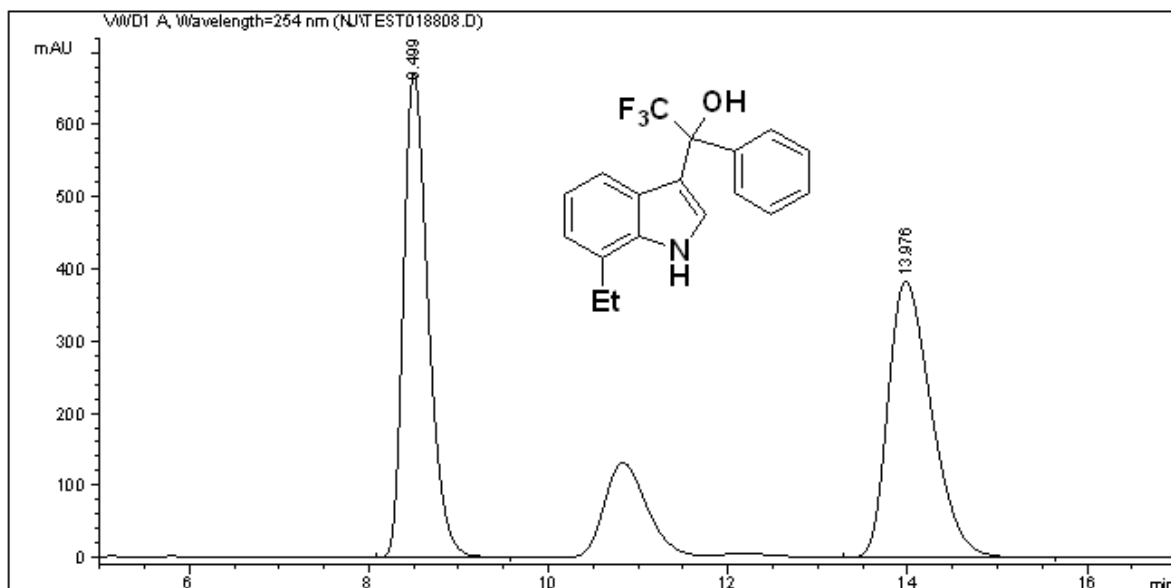

Signal 1: VWD1 A, Wavelength=254 nm

| Peak # | RetTime [min] | Type | Width [min] | Area mAU *s | Height [mAU] | Area %  |
|--------|---------------|------|-------------|-------------|--------------|---------|
| 1      | 8.499         | BV   | 0.2924      | 1.28247e4   | 672.56567    | 50.0122 |
| 2      | 13.976        | VB   | 0.5187      | 1.28184e4   | 382.94171    | 49.9878 |

Totals : 2.56430e4 1055.50739

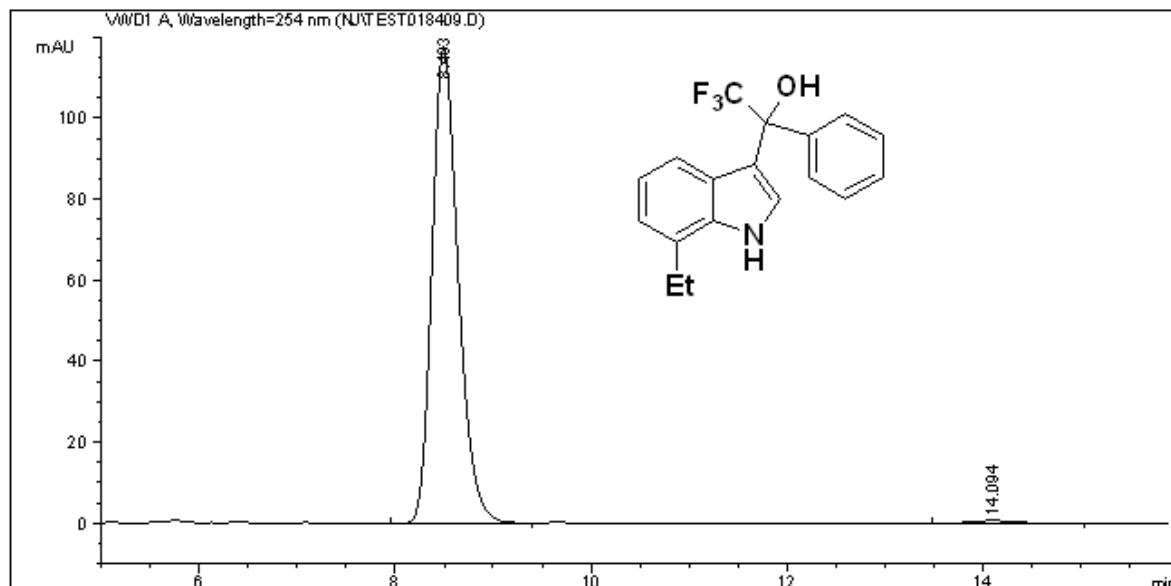

Signal 1: VWD1 A, Wavelength=254 nm

| Peak # | RetTime [min] | Type | Width [min] | Area mAU *s | Height [mAU] | Area %  |
|--------|---------------|------|-------------|-------------|--------------|---------|
| 1      | 8.493         | VV   | 0.2847      | 2181.36572  | 117.64856    | 98.9767 |
| 2      | 14.094        | BB   | 0.4881      | 22.55185    | 6.97106e-1   | 1.0233  |

Totals : 2203.91757 118.34567

Sample Info : 254nm,0D-H,i-PrOH:Hexane=10:90,0.8mL/min

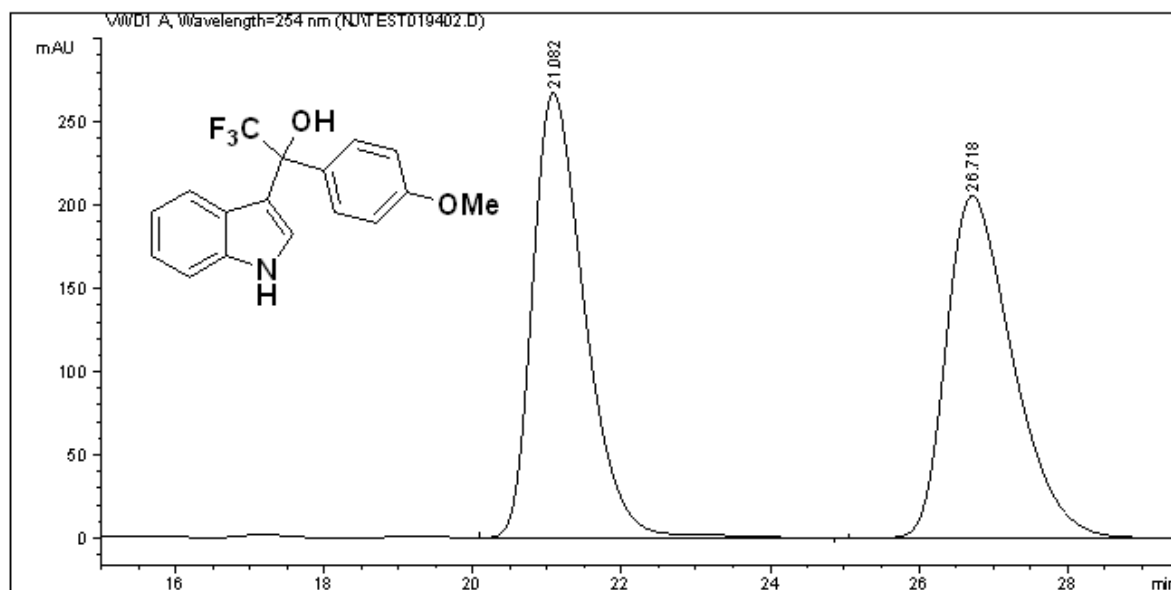

Signal 1: VWD1 A, Wavelength=254 nm

| Peak # | RetTime [min] | Type | Width [min] | Area mAU *s | Height [mAU] | Area %  |
|--------|---------------|------|-------------|-------------|--------------|---------|
| 1      | 21.082        | VB   | 0.7441      | 1.29962e4   | 267.67911    | 50.4822 |
| 2      | 26.718        | BBA  | 0.9535      | 1.27479e4   | 205.58960    | 49.5178 |

Totals : 2.57441e4 473.26871

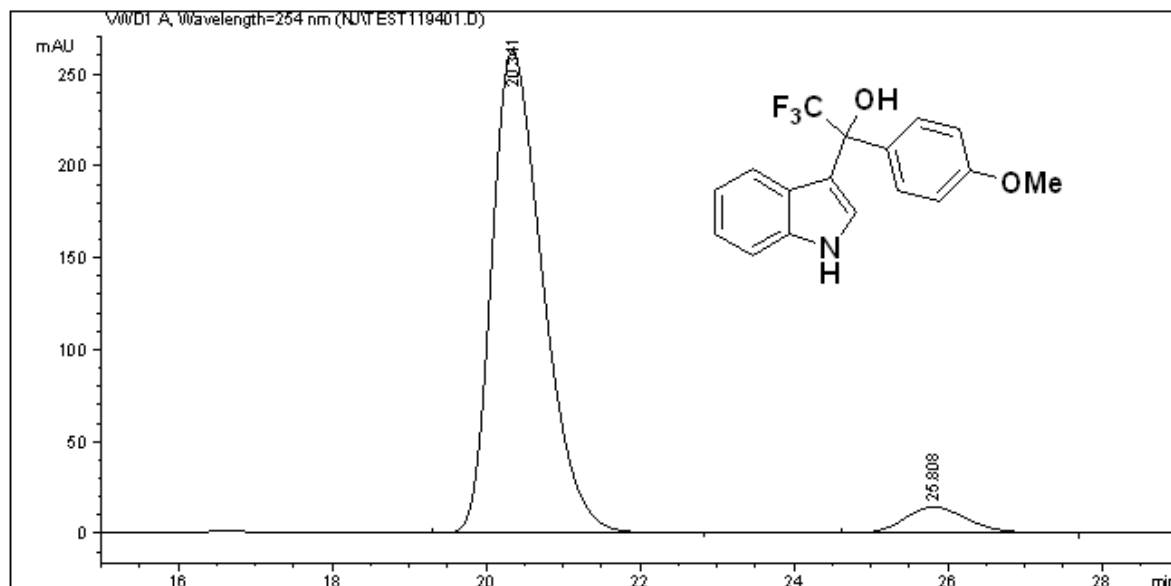

Signal 1: VWD1 A, Wavelength=254 nm

| Peak # | RetTime [min] | Type | Width [min] | Area mAU *s | Height [mAU] | Area %  |
|--------|---------------|------|-------------|-------------|--------------|---------|
| 1      | 20.341        | VB   | 0.7065      | 1.20400e4   | 262.69604    | 93.6905 |
| 2      | 25.808        | BB   | 0.8700      | 810.81628   | 14.26214     | 6.3095  |

Totals : 1.28508e4 276.95818

Sample Info : 254nm,0D-H,i-PrOH:Hexane=10:90,1.0mL/min

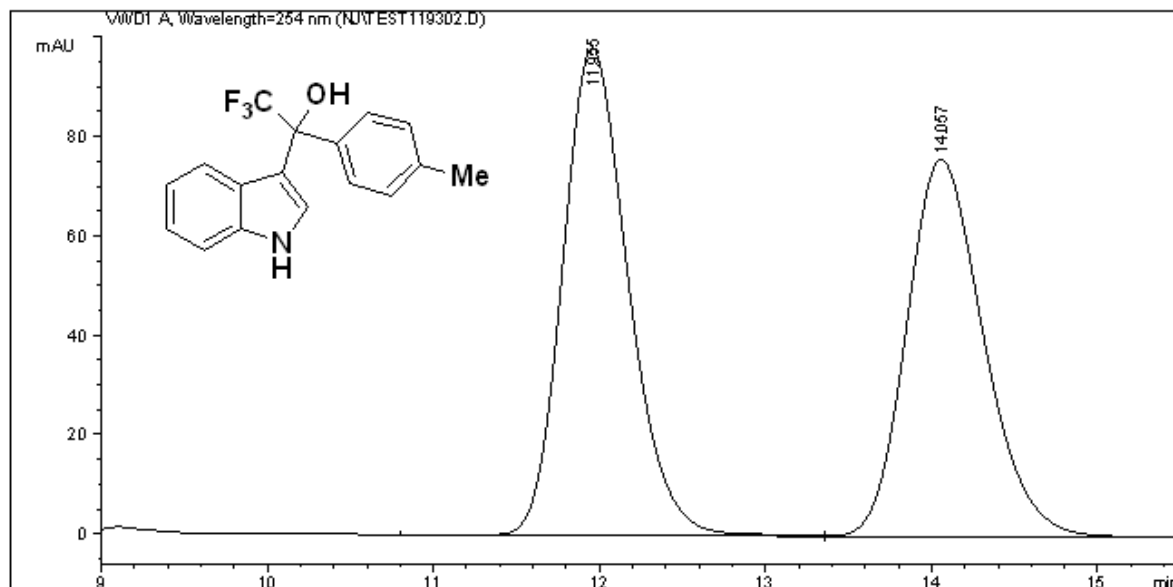

Signal 1: WWD1 A, Wavelength=254 nm

| Peak # | RetTime [min] | Type | Width [min] | Area mAU *s | Height [mAU] | Area %  |
|--------|---------------|------|-------------|-------------|--------------|---------|
| 1      | 11.955        | VV   | 0.4242      | 2687.52661  | 98.18417     | 52.4450 |
| 2      | 14.057        | VB   | 0.4969      | 2436.93970  | 75.90729     | 47.5550 |

Totals : 5124.46631 174.09146

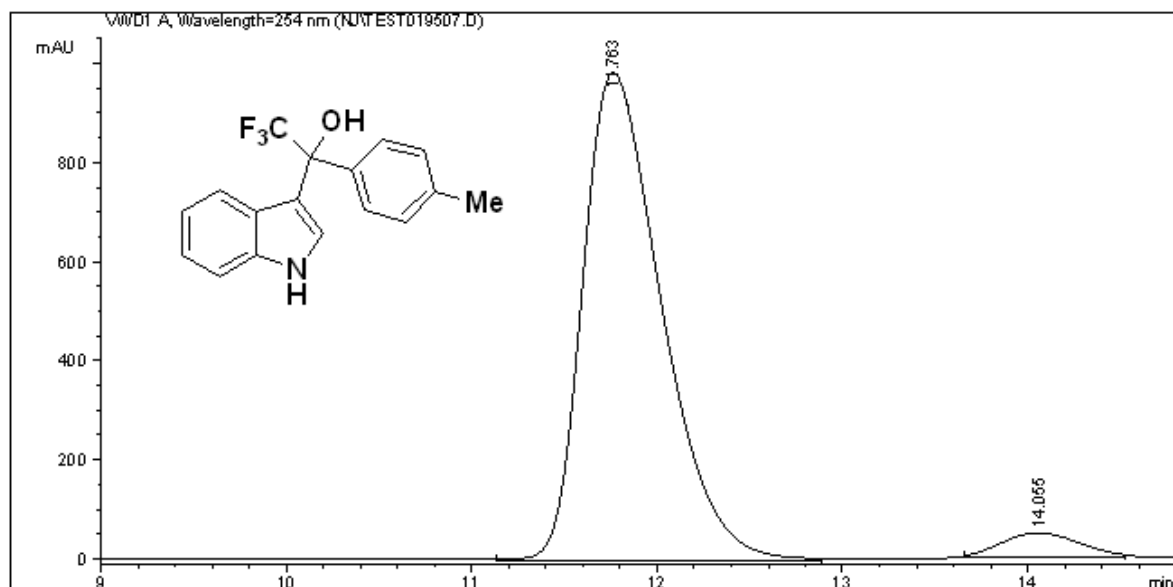

Signal 1: WWD1 A, Wavelength=254 nm

| Peak # | RetTime [min] | Type | Width [min] | Area mAU *s | Height [mAU] | Area %  |
|--------|---------------|------|-------------|-------------|--------------|---------|
| 1      | 11.763        | MM   | 0.4927      | 2.91500e4   | 985.97650    | 95.4076 |
| 2      | 14.055        | MM   | 0.4839      | 1403.12378  | 48.32924     | 4.5924  |

Totals : 3.05531e4 1034.30574

Sample Info : 254nm,0D-H,i-PrOH:Hexane=10:90,1.0mL/min

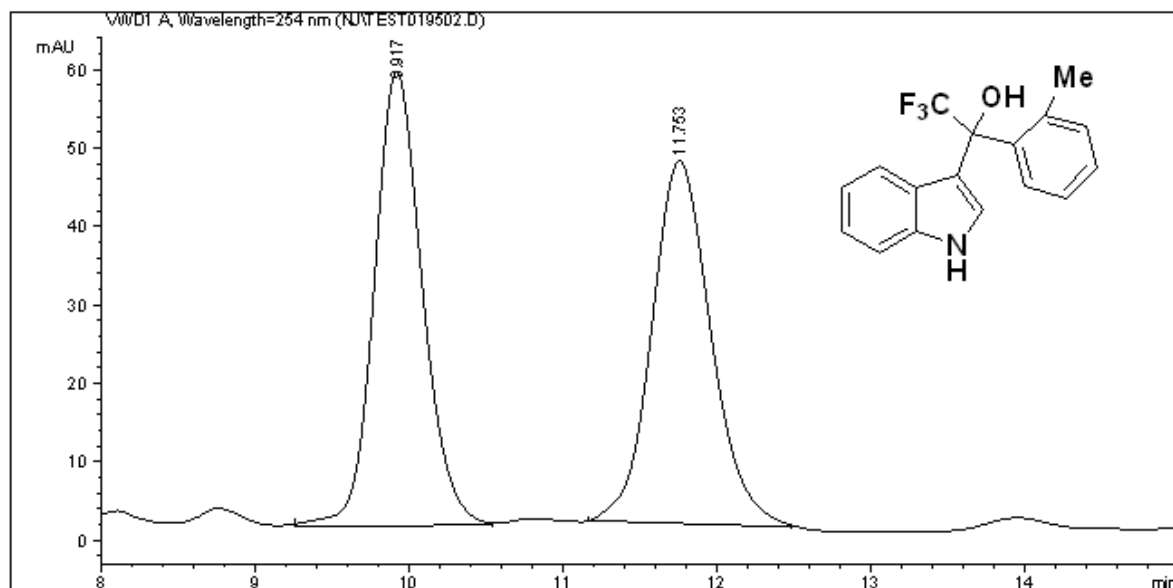

Signal 1: VWD1 A, Wavelength=254 nm

| Peak # | RetTime [min] | Type | Width [min] | Area mAU *s | Height [mAU] | Area %  |
|--------|---------------|------|-------------|-------------|--------------|---------|
| 1      | 9.917         | MM   | 0.3610      | 1253.81824  | 57.87966     | 50.3713 |
| 2      | 11.753        | MM   | 0.4454      | 1235.33240  | 46.22379     | 49.6287 |

Totals : 2489.15063 104.10345

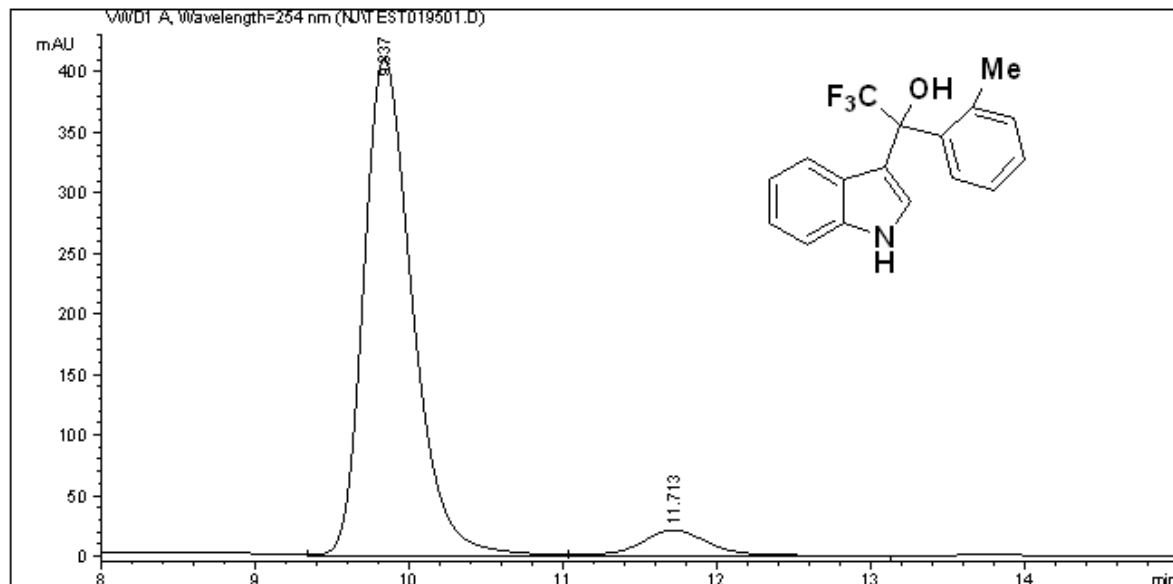

Signal 1: VWD1 A, Wavelength=254 nm

| Peak # | RetTime [min] | Type | Width [min] | Area mAU *s | Height [mAU] | Area %  |
|--------|---------------|------|-------------|-------------|--------------|---------|
| 1      | 9.837         | VV   | 0.3378      | 9033.61523  | 411.22504    | 93.0366 |
| 2      | 11.713        | VV   | 0.4722      | 676.13019   | 21.47260     | 6.9634  |

Totals : 9709.74542 432.69764

Sample Info : 254nm,0D-H,i-PrOH:Hexane=10:90,0.8mL/min

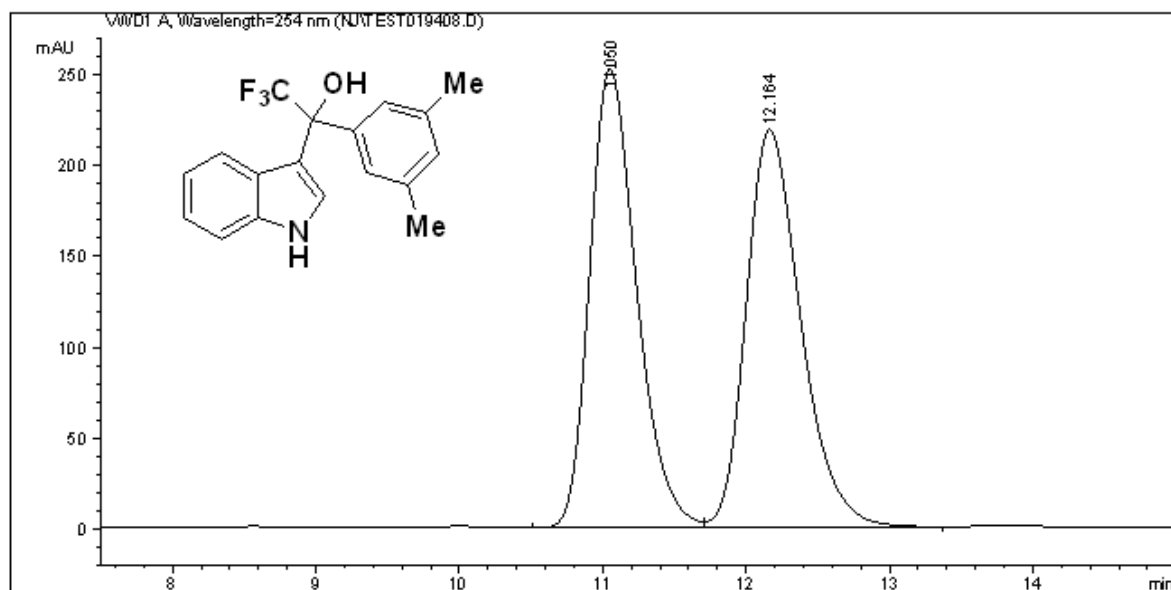

Signal 1: VWD1 A, Wavelength=254 nm

| Peak # | RetTime [min] | Type | Width [min] | Area mAU *s | Height [mAU] | Area %  |
|--------|---------------|------|-------------|-------------|--------------|---------|
| 1      | 11.050        | VV   | 0.3498      | 5765.49951  | 253.45621    | 49.6180 |
| 2      | 12.164        | VV   | 0.4068      | 5854.27344  | 219.85269    | 50.3820 |

Totals : 1.16198e4 473.30890

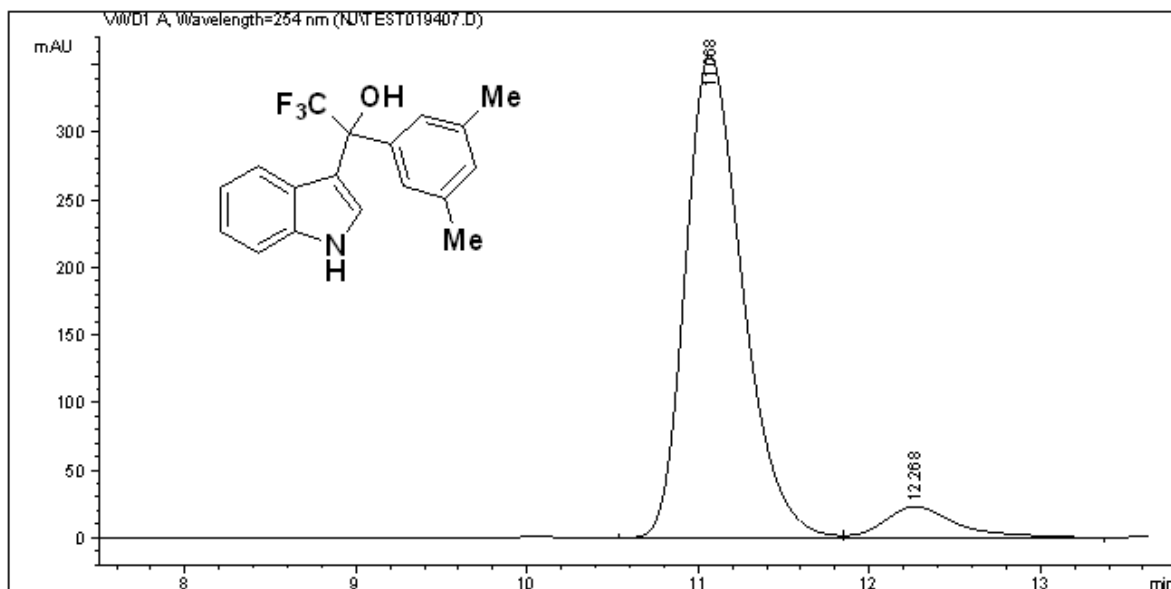

Signal 1: VWD1 A, Wavelength=254 nm

| Peak # | RetTime [min] | Type | Width [min] | Area mAU *s | Height [mAU] | Area %  |
|--------|---------------|------|-------------|-------------|--------------|---------|
| 1      | 11.068        | VV   | 0.3541      | 8253.09570  | 357.09744    | 92.4921 |
| 2      | 12.268        | VV   | 0.4390      | 669.92804   | 22.98512     | 7.5079  |

Totals : 8923.02374 380.08257

Sample Info : 254nm,OD-H,i-PrOH:Hexane=10:90,1.0mL/min

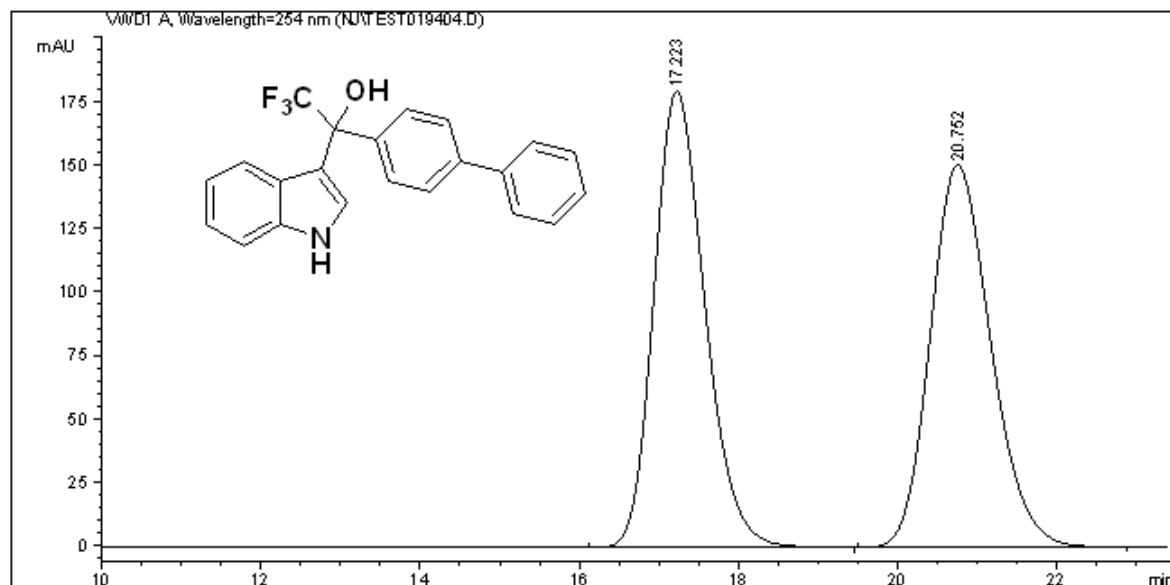

Signal 1: VWD1 A, Wavelength=254 nm

| Peak # | RetTime [min] | Type | Width [min] | Area mAU *s | Height [mAU] | Area %  |
|--------|---------------|------|-------------|-------------|--------------|---------|
| 1      | 17.223        | VB   | 0.6882      | 7994.50439  | 179.59659    | 50.1885 |
| 2      | 20.752        | BB   | 0.8078      | 7934.44727  | 150.37811    | 49.8115 |

Totals : 1.59290e4 329.97470

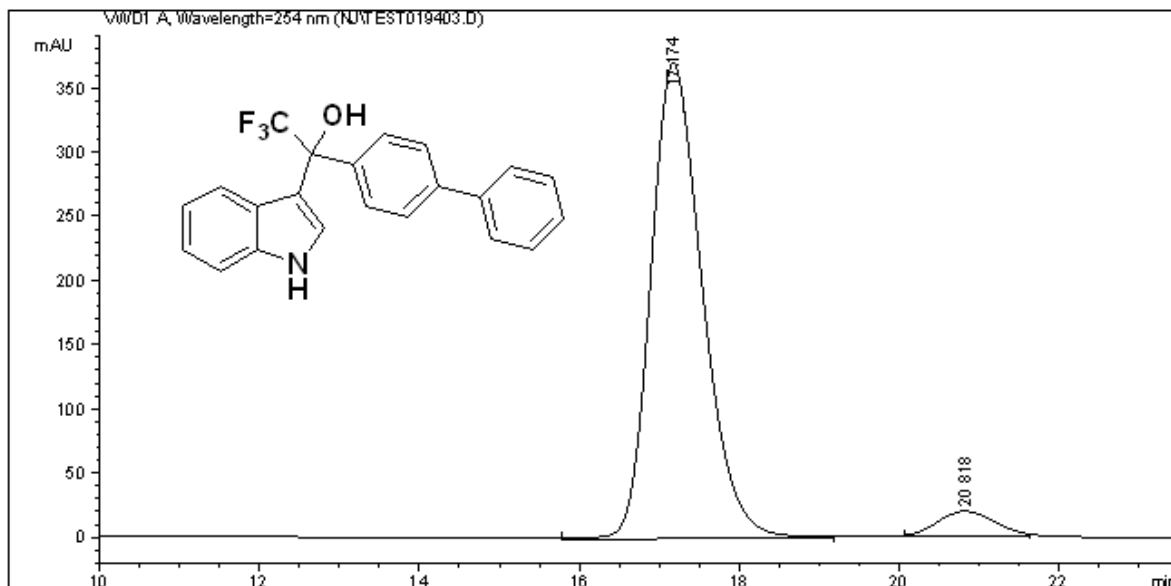

Signal 1: VWD1 A, Wavelength=254 nm

| Peak # | RetTime [min] | Type | Width [min] | Area mAU *s | Height [mAU] | Area %  |
|--------|---------------|------|-------------|-------------|--------------|---------|
| 1      | 17.174        | MM   | 0.7481      | 1.66279e4   | 370.46442    | 94.8972 |
| 2      | 20.818        | PM   | 0.7975      | 894.11829   | 18.68536     | 5.1028  |

Totals : 1.75220e4 389.14977



Sample Info : 254nm,0D-H,i-PrOH:Hexane=10:90,0.8mL/min

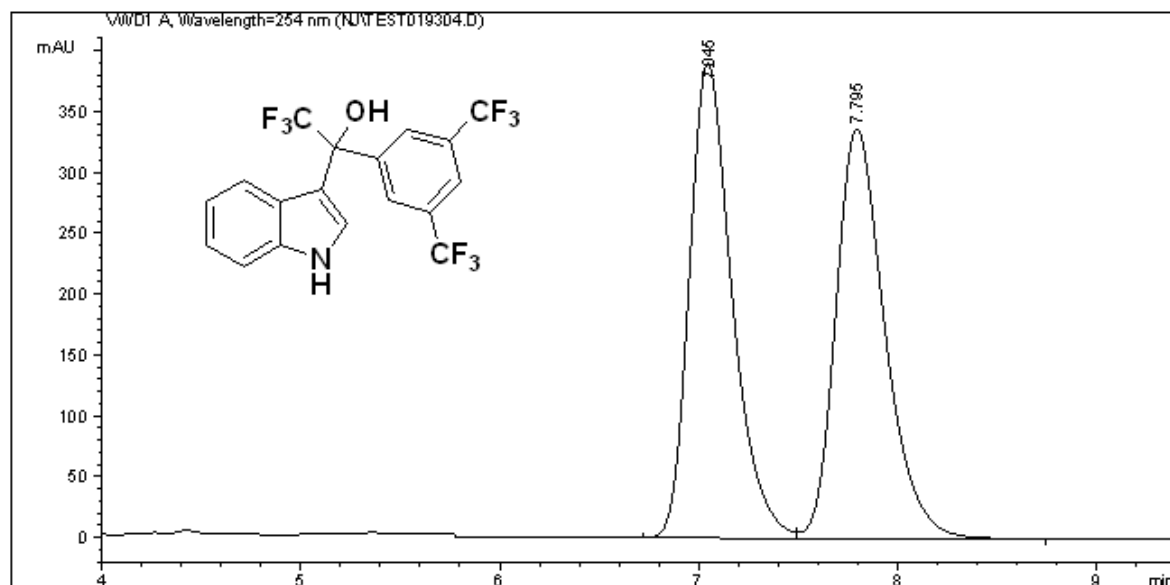

Signal 1: VWD1 A, Wavelength=254 nm

| Peak # | RetTime [min] | Type | Width [min] | Area mAU *s | Height [mAU] | Area %  |
|--------|---------------|------|-------------|-------------|--------------|---------|
| 1      | 7.045         | VV   | 0.2265      | 5815.16064  | 389.61426    | 50.2622 |
| 2      | 7.795         | VV   | 0.2606      | 5754.48730  | 336.63477    | 49.7378 |

Totals : 1.15696e4 726.24902

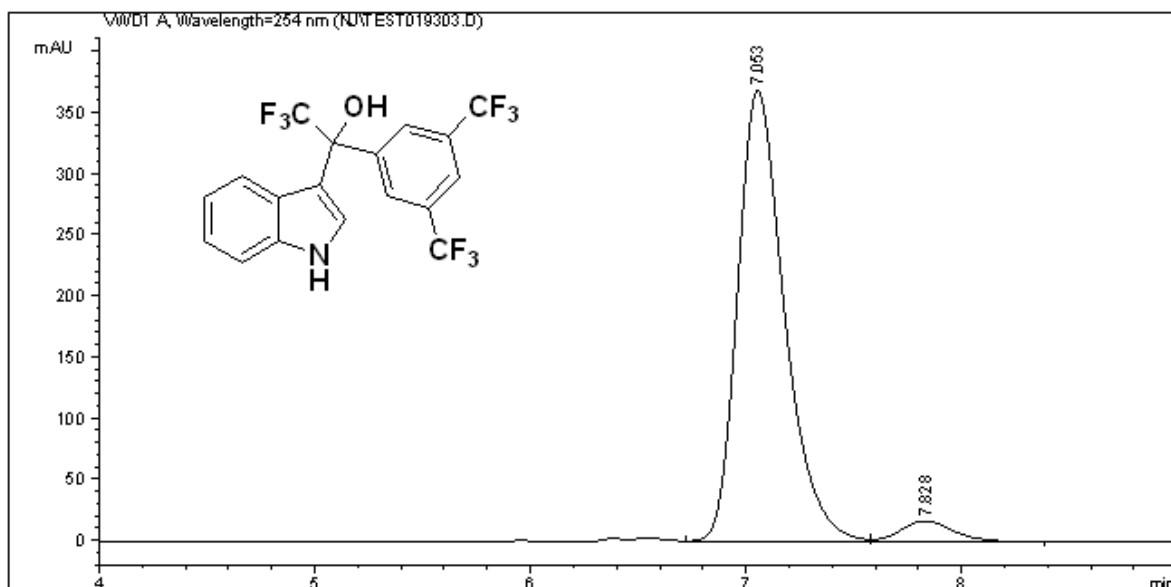

Signal 1: VWD1 A, Wavelength=254 nm

| Peak # | RetTime [min] | Type | Width [min] | Area mAU *s | Height [mAU] | Area %  |
|--------|---------------|------|-------------|-------------|--------------|---------|
| 1      | 7.053         | VV   | 0.2291      | 5590.82617  | 369.19833    | 94.7892 |
| 2      | 7.828         | VV   | 0.2724      | 307.34070   | 17.21092     | 5.2108  |

Totals : 5898.16687 386.40925

Sample Info : 254nm,0D-H,i-PrOH:Hexane=10:90,0.8mL/min

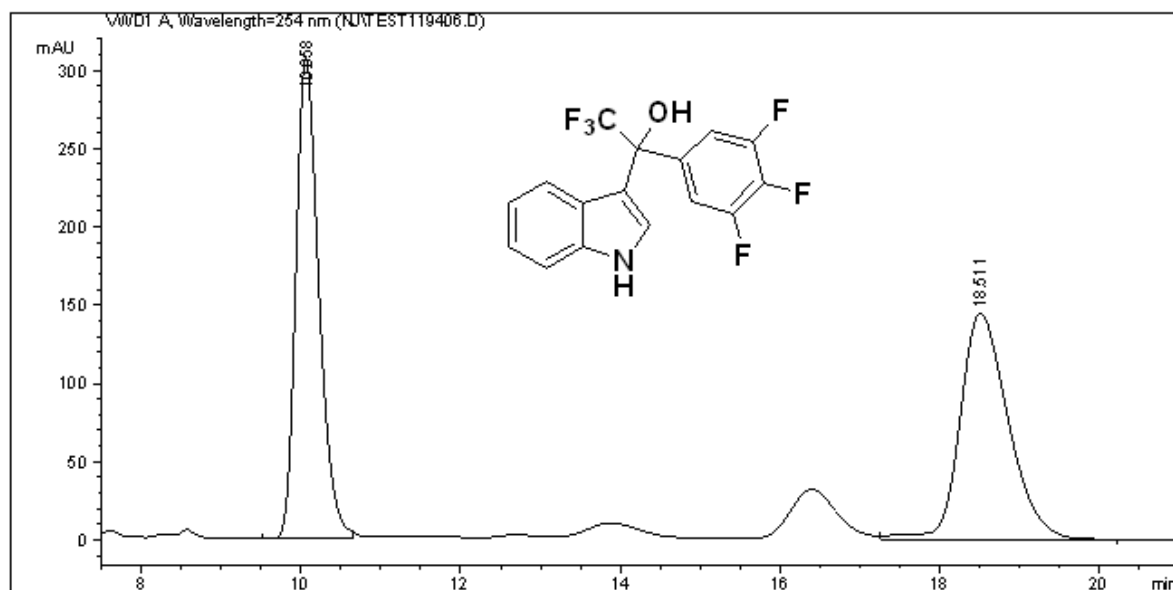

Signal 1: VWD1 A, Wavelength=254 nm

| Peak # | RetTime [min] | Type | Width [min] | Area mAU *s | Height [mAU] | Area %  |
|--------|---------------|------|-------------|-------------|--------------|---------|
| 1      | 10.058        | VV   | 0.3059      | 6150.31006  | 307.80887    | 50.4946 |
| 2      | 18.511        | VB   | 0.6413      | 6029.81934  | 144.46465    | 49.5054 |

Totals : 1.21801e4 452.27351

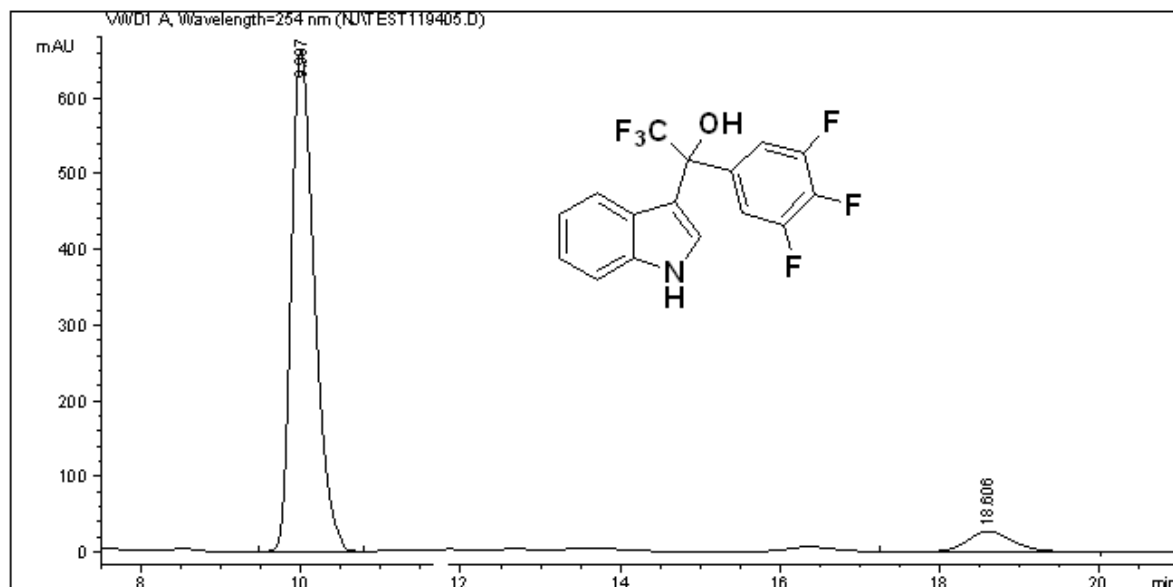

Signal 1: VWD1 A, Wavelength=254 nm

| Peak # | RetTime [min] | Type | Width [min] | Area mAU *s | Height [mAU] | Area %  |
|--------|---------------|------|-------------|-------------|--------------|---------|
| 1      | 9.997         | VBA  | 0.3081      | 1.33820e4   | 663.61560    | 92.4960 |
| 2      | 18.606        | VB   | 0.6296      | 1085.64880  | 26.64857     | 7.5040  |

Totals : 1.44676e4 690.26417

Sample Info : 254nm,OD-H,i-PrOH:Hexane=20:80,0.8mL/min

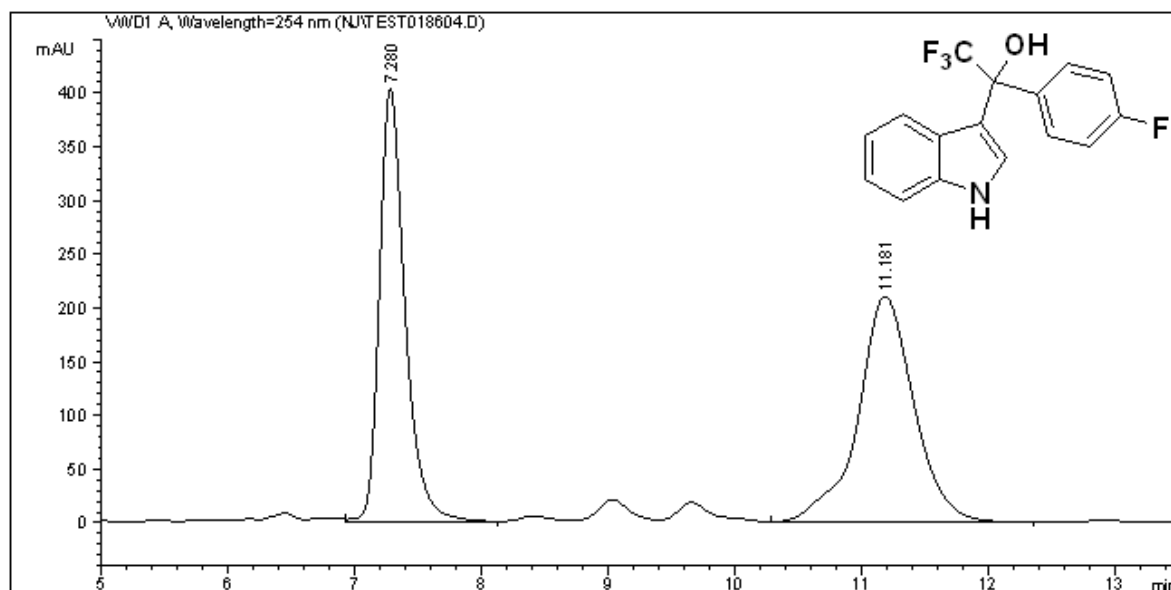

Signal 1: VWD1 A, Wavelength=254 nm

| Peak # | RetTime [min] | Type | Width [min] | Area mAU *s | Height [mAU] | Area %  |
|--------|---------------|------|-------------|-------------|--------------|---------|
| 1      | 7.280         | VV   | 0.2153      | 5745.09717  | 404.25415    | 46.6568 |
| 2      | 11.181        | VB   | 0.4681      | 6568.43115  | 210.96999    | 53.3432 |

Totals : 1.23135e4 615.22414

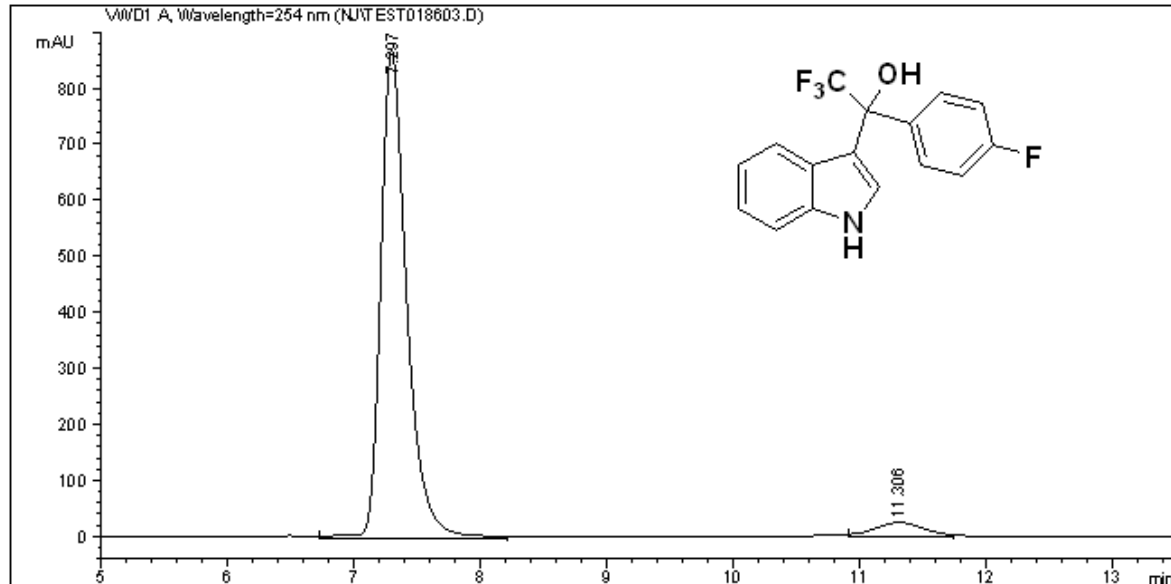

Signal 1: VWD1 A, Wavelength=254 nm

| Peak # | RetTime [min] | Type | Width [min] | Area mAU *s | Height [mAU] | Area %  |
|--------|---------------|------|-------------|-------------|--------------|---------|
| 1      | 7.297         | MM   | 0.2417      | 1.26761e4   | 874.12439    | 94.4796 |
| 2      | 11.306        | MM   | 0.4731      | 740.65753   | 26.09104     | 5.5204  |

Totals : 1.34167e4 900.21543

Sample Info : 254nm,OD-H,i-PrOH:Hexane=20:80,0.8mL/min

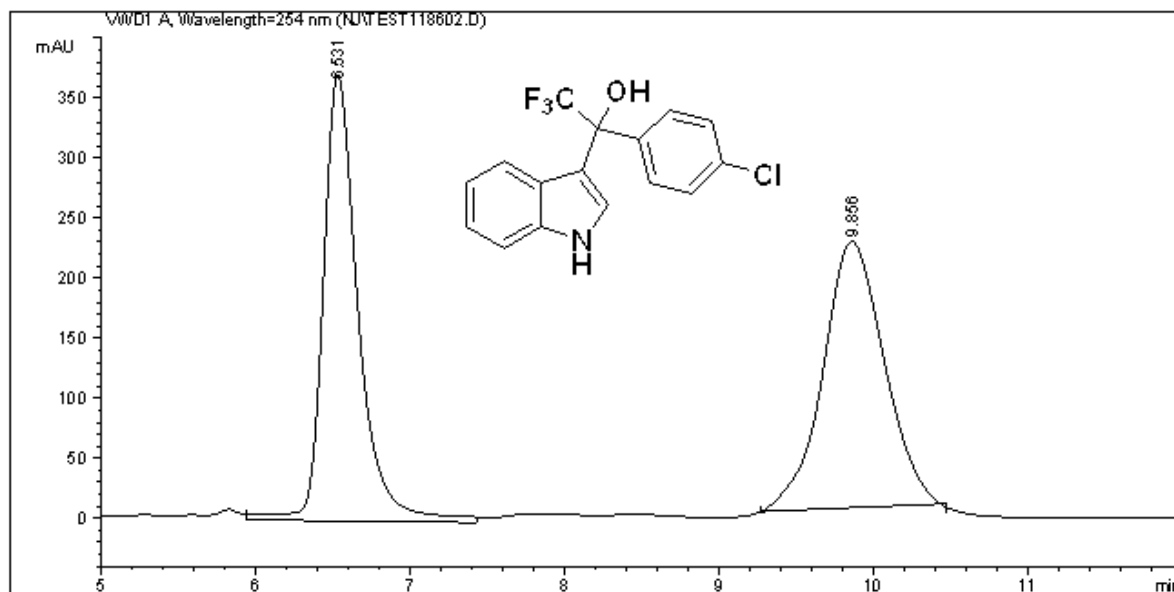

Signal 1: VWD1 A, Wavelength=254 nm

| Peak # | RetTime [min] | Type | Width [min] | Area mAU   | Area %  | Height [mAU] | Area %  |
|--------|---------------|------|-------------|------------|---------|--------------|---------|
| 1      | 6.531         | MM   | 0.2636      | 5878.44580 | 49.0932 | 371.71259    | 49.0932 |
| 2      | 9.856         | MM   | 0.4583      | 6095.60156 | 50.9068 | 221.68637    | 50.9068 |

Totals : 1.19740e4 593.39896

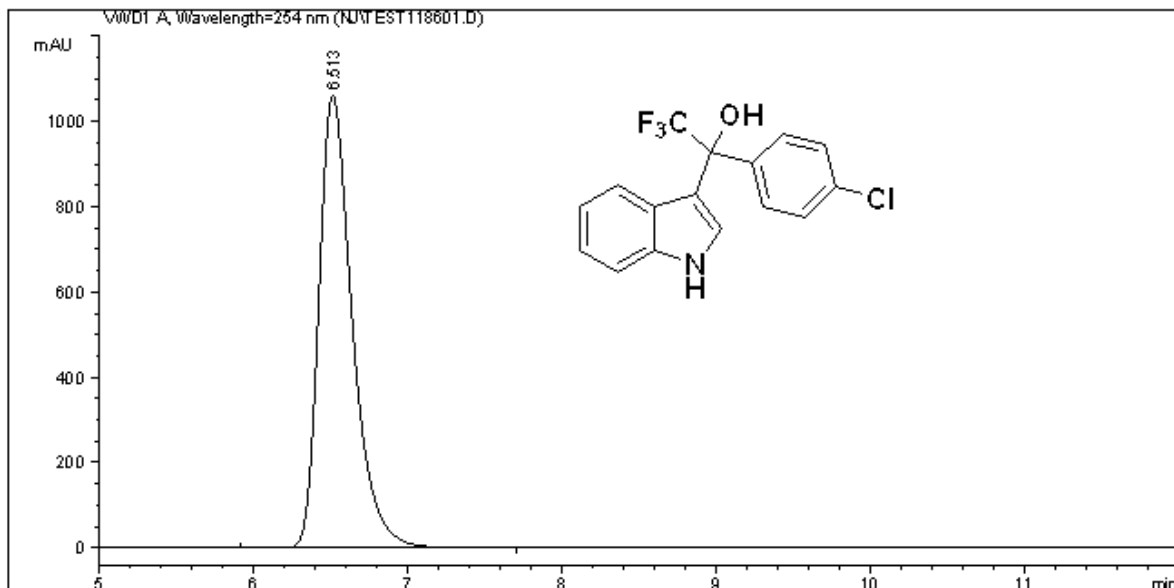

Signal 1: VWD1 A, Wavelength=254 nm

| Peak # | RetTime [min] | Type | Width [min] | Area mAU  | Area %   | Height [mAU] | Area %   |
|--------|---------------|------|-------------|-----------|----------|--------------|----------|
| 1      | 6.513         | VB   | 0.2273      | 1.58972e4 | 100.0000 | 1060.72620   | 100.0000 |

Totals : 1.58972e4 1060.72620

Sample Info : 254nm,0D-H,i-PrOH:Hexane=10:90,1.0mL/min

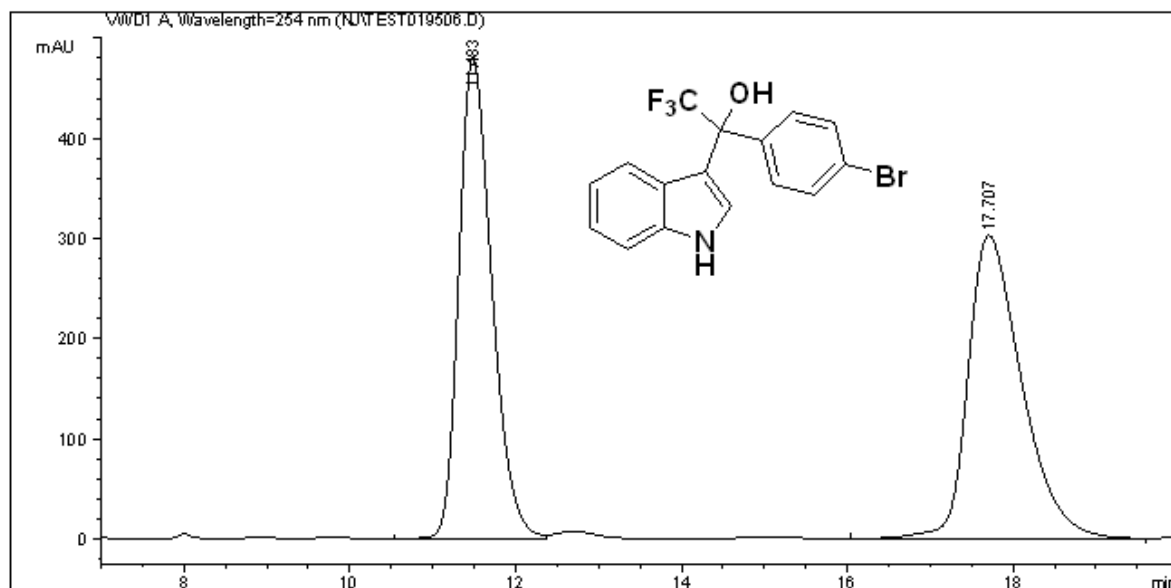

Signal 1: VWD1 A, Wavelength=254 nm

| Peak # | RetTime [min] | Type | Width [min] | Area mAU  | Area %  | Height [mAU] | Area %  |
|--------|---------------|------|-------------|-----------|---------|--------------|---------|
| 1      | 11.483        | VV   | 0.4277      | 1.32993e4 | 49.2703 | 480.63654    | 49.2703 |
| 2      | 17.707        | VV   | 0.6843      | 1.36932e4 | 50.7297 | 303.10638    | 50.7297 |

Totals : 2.69925e4 783.74292

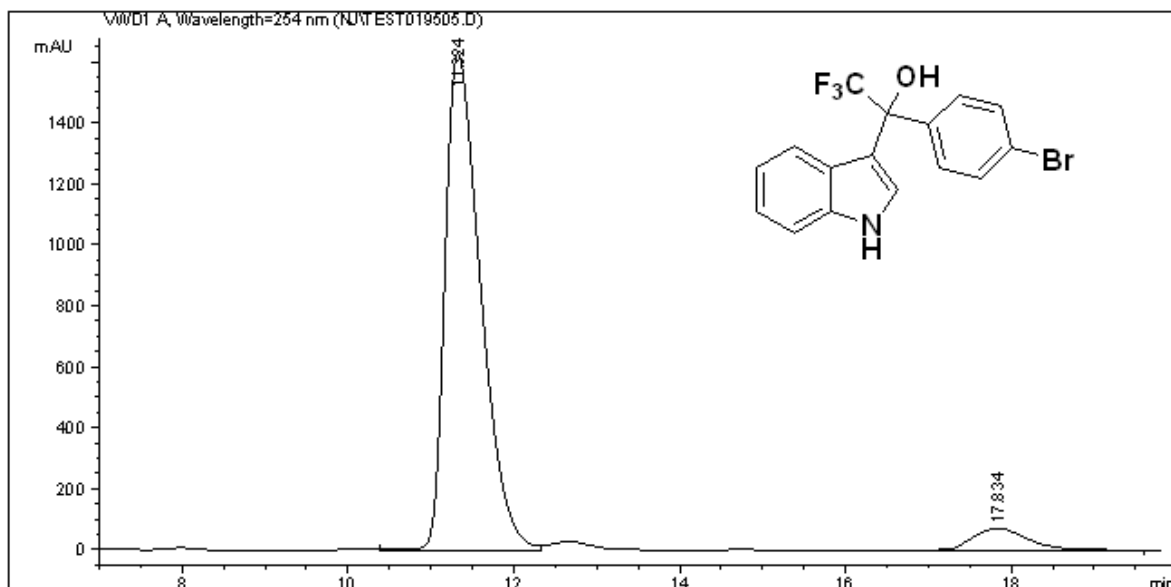

Signal 1: VWD1 A, Wavelength=254 nm

| Peak # | RetTime [min] | Type | Width [min] | Area mAU   | Area %  | Height [mAU] | Area %  |
|--------|---------------|------|-------------|------------|---------|--------------|---------|
| 1      | 11.324        | VV   | 0.4574      | 4.84758e4  | 93.5435 | 1630.94202   | 93.5435 |
| 2      | 17.834        | VV   | 0.6970      | 3345.83838 | 6.4565  | 71.17182     | 6.4565  |

Totals : 5.18216e4 1702.11384

Sample Info : 254nm,AD-H,i-PrOH:Hexane=5:95,1.0mL/min

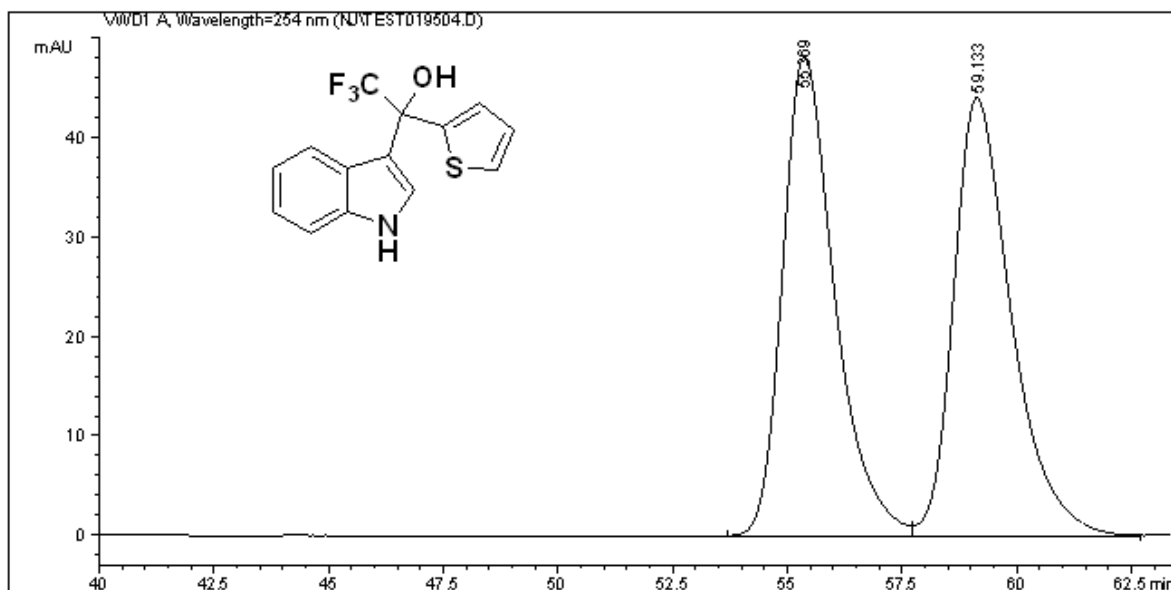

Signal 1: VWD1 A, Wavelength=254 nm

| Peak # | RetTime [min] | Type | Width [min] | Area mAU *s | Height [mAU] | Area %  |
|--------|---------------|------|-------------|-------------|--------------|---------|
| 1      | 55.369        | BV   | 1.2099      | 3819.26416  | 48.19700     | 49.7189 |
| 2      | 59.133        | VB   | 1.3385      | 3862.45703  | 44.12909     | 50.2811 |

Totals : 7681.72119 92.32609

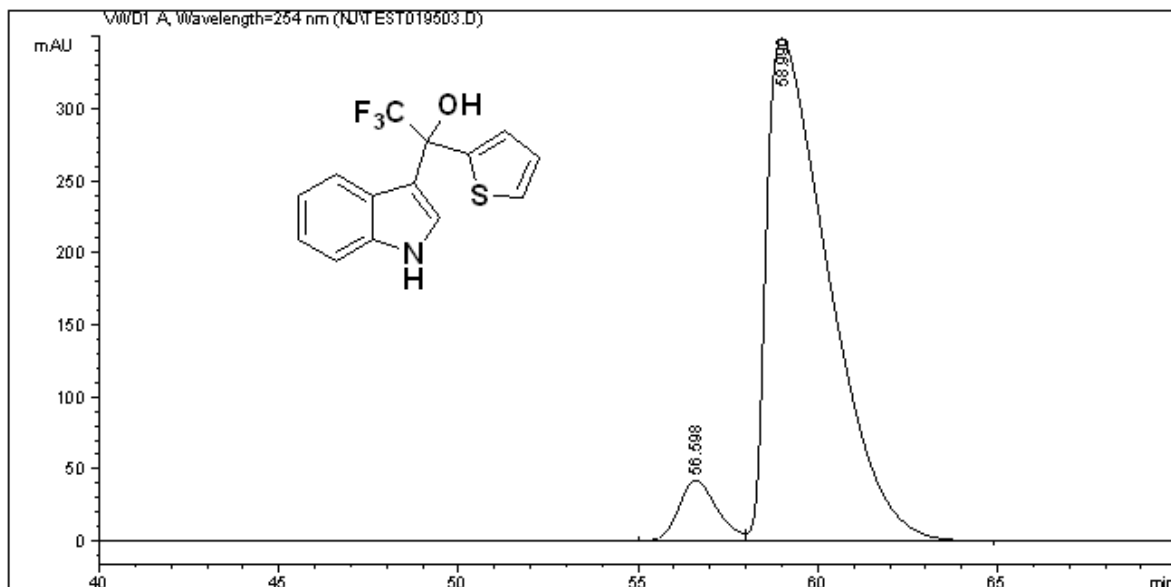

Signal 1: VWD1 A, Wavelength=254 nm

| Peak # | RetTime [min] | Type | Width [min] | Area mAU *s | Height [mAU] | Area %  |
|--------|---------------|------|-------------|-------------|--------------|---------|
| 1      | 56.598        | BV   | 1.1263      | 3099.97705  | 42.13010     | 6.9096  |
| 2      | 58.990        | VB   | 1.7081      | 4.17651e4   | 348.91254    | 93.0904 |

Totals : 4.48650e4 391.04263

Sample Info : 254nm,AD-H,i-PrOH:Hexane=10:90,1.0mL/min

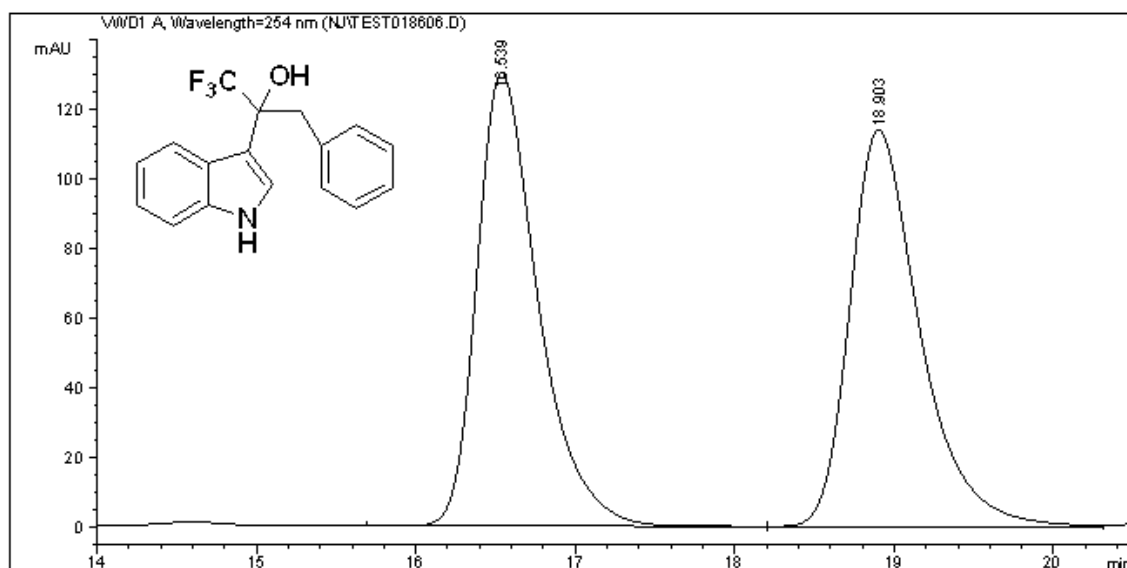

Signal 1: VWD1 A, Wavelength=254 nm

| Peak # | RetTime [min] | Type | Width [min] | Area mAU *s | Height [mAU] | Area %  |
|--------|---------------|------|-------------|-------------|--------------|---------|
| 1      | 16.539        | BV   | 0.4045      | 3465.19019  | 129.86356    | 49.9032 |
| 2      | 18.903        | VV   | 0.4619      | 3478.63452  | 113.66528    | 50.0968 |

Totals : 6943.82471 243.52884

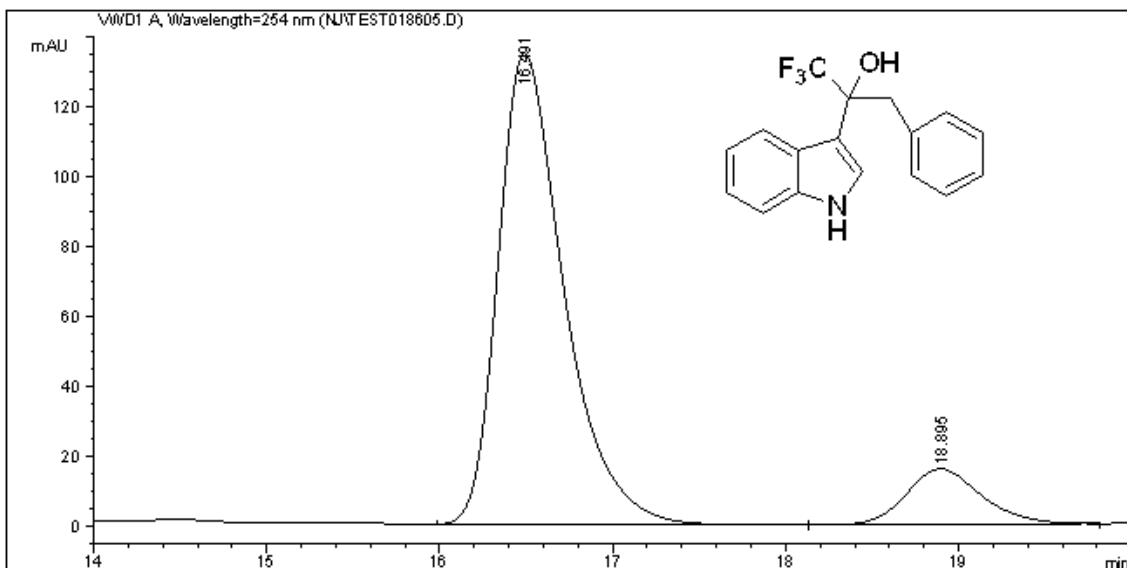

Signal 1: VWD1 A, Wavelength=254 nm

| Peak # | RetTime [min] | Type | Width [min] | Area mAU *s | Height [mAU] | Area %  |
|--------|---------------|------|-------------|-------------|--------------|---------|
| 1      | 16.491        | BV   | 0.4023      | 3569.87231  | 134.74466    | 88.1126 |
| 2      | 18.895        | VV   | 0.4588      | 481.61505   | 15.87487     | 11.8874 |

Totals : 4051.48737 150.61953

Sample Info : 254nm,OD-H,i-PrOH:Hexane=2:98,1.0mL/min

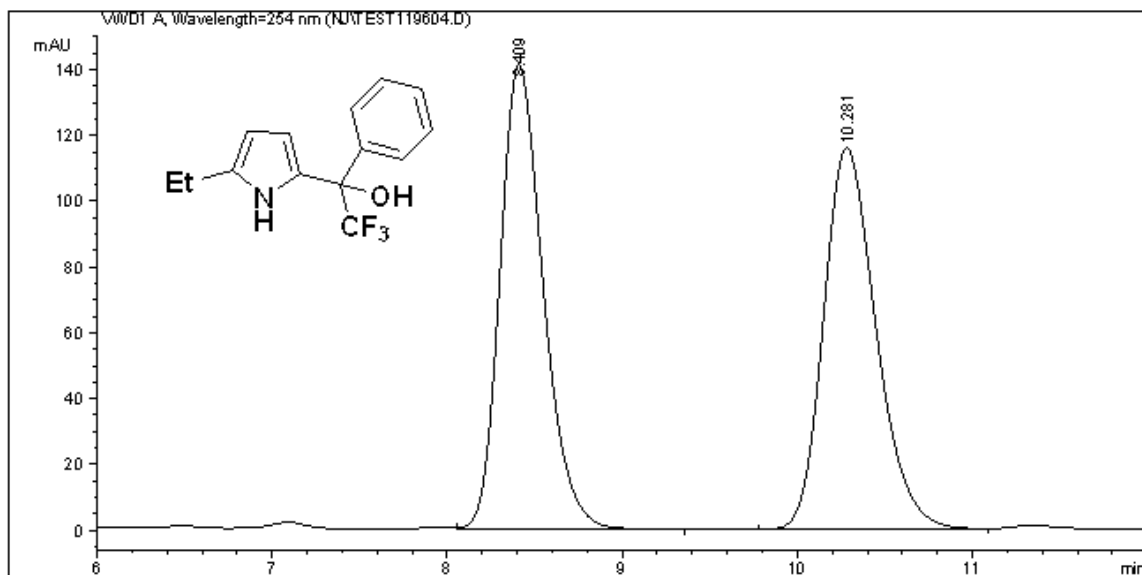

Signal 1: VWD1 A, Wavelength=254 nm

| Peak # | RetTime [min] | Type | Width [min] | Area mAU *s | Height [mAU] | Area %  |
|--------|---------------|------|-------------|-------------|--------------|---------|
| 1      | 8.409         | VB   | 0.2646      | 2428.48828  | 141.30510    | 50.0127 |
| 2      | 10.281        | BV   | 0.3225      | 2427.25659  | 116.11211    | 49.9873 |

Totals : 4855.74487 257.41721

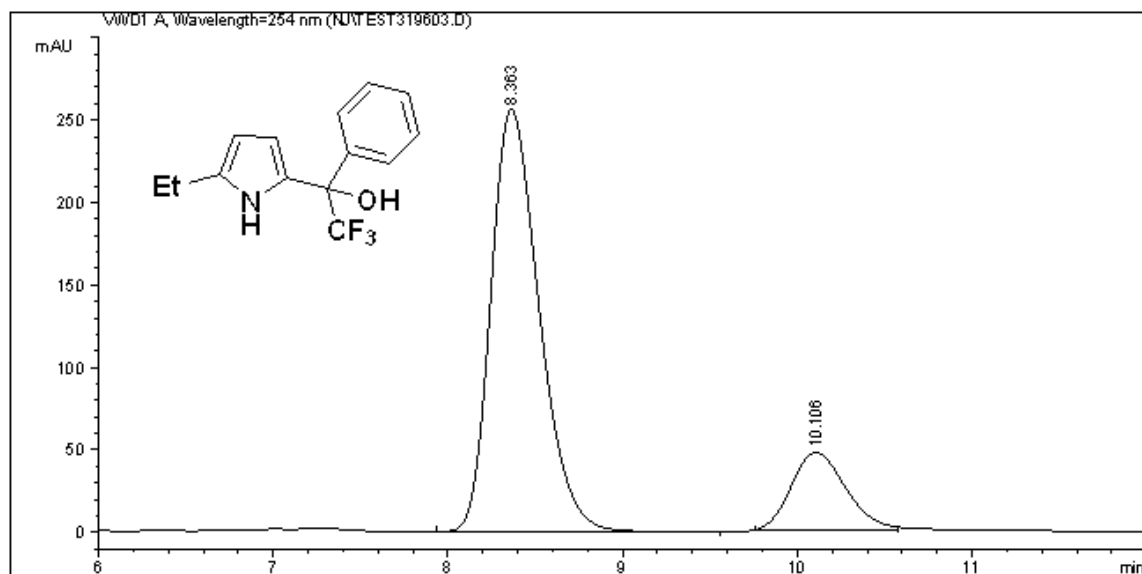

Signal 1: VWD1 A, Wavelength=254 nm

| Peak # | RetTime [min] | Type | Width [min] | Area mAU *s | Height [mAU] | Area %  |
|--------|---------------|------|-------------|-------------|--------------|---------|
| 1      | 8.363         | VB   | 0.2967      | 4915.94141  | 256.15021    | 82.6345 |
| 2      | 10.106        | MM   | 0.3635      | 1033.07678  | 47.36842     | 17.3655 |

Totals : 5949.01819 303.51863



Sample Info : 254nm,OD-H,i-PrOH:Hexane=10:90,0.9mL/min

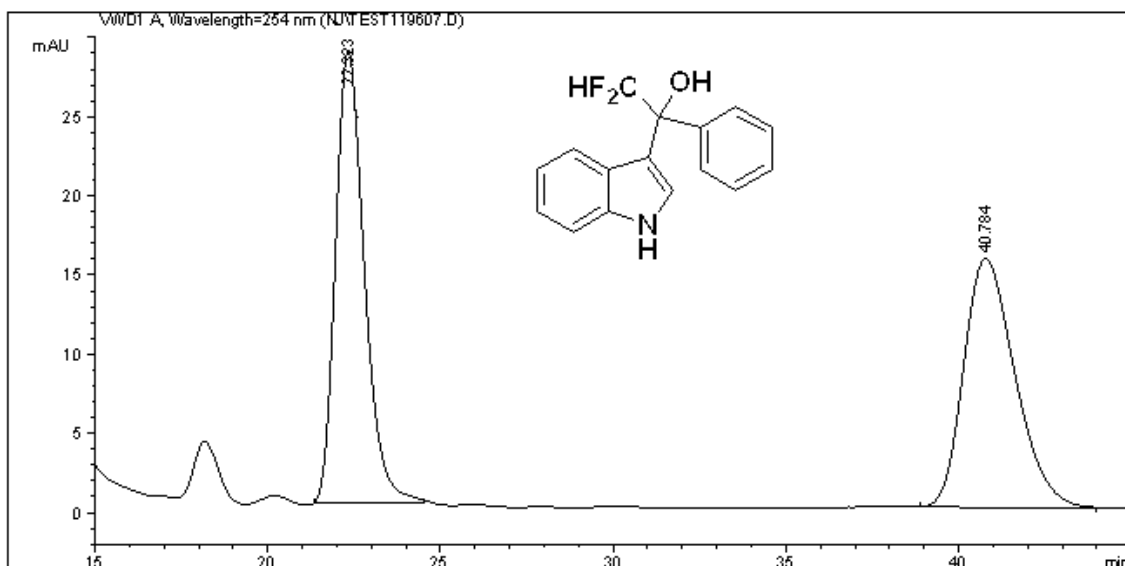

Signal 1: VWD1 A, Wavelength=254 nm

| Peak # | RetTime [min] | Type | Width [min] | Area mAU *s | Height [mAU] | Area %  |
|--------|---------------|------|-------------|-------------|--------------|---------|
| 1      | 22.323        | PM   | 0.9632      | 1647.94971  | 28.51564     | 50.3624 |
| 2      | 40.784        | PM   | 1.7193      | 1624.23352  | 15.74555     | 49.6376 |

Totals : 3272.18323 44.26118

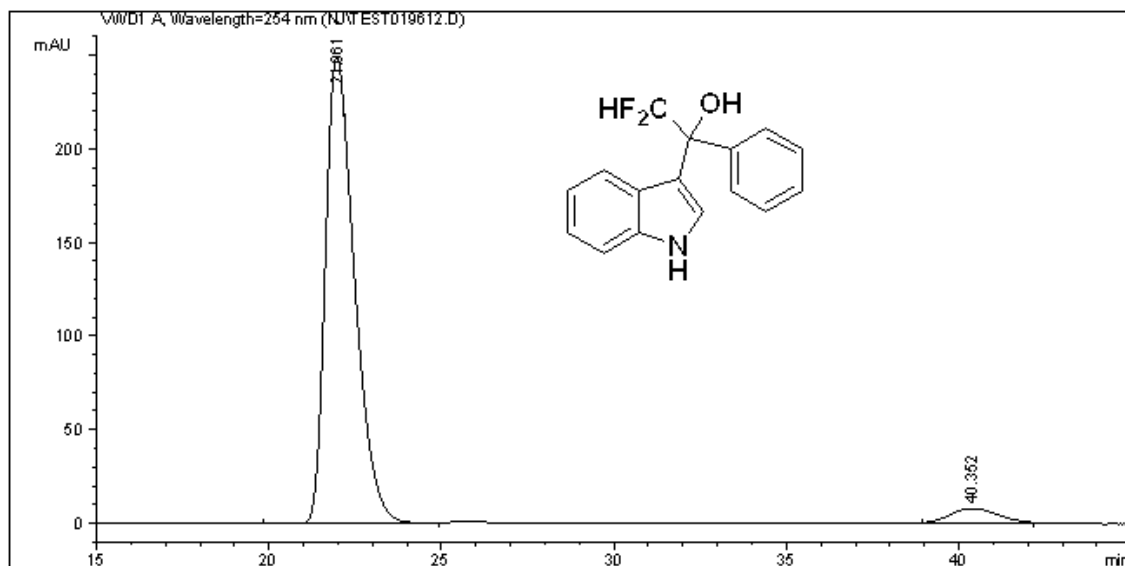

Signal 1: VWD1 A, Wavelength=254 nm

| Peak # | RetTime [min] | Type | Width [min] | Area mAU *s | Height [mAU] | Area %  |
|--------|---------------|------|-------------|-------------|--------------|---------|
| 1      | 21.961        | MM   | 0.9755      | 1.46063e4   | 249.55125    | 94.8738 |
| 2      | 40.352        | MM   | 1.6338      | 789.20020   | 8.05054      | 5.1262  |

Totals : 1.53955e4 257.60179

Sample Info : 254nm,OD-H,i-PrOH:Hexane=10:90,0.9mL/min

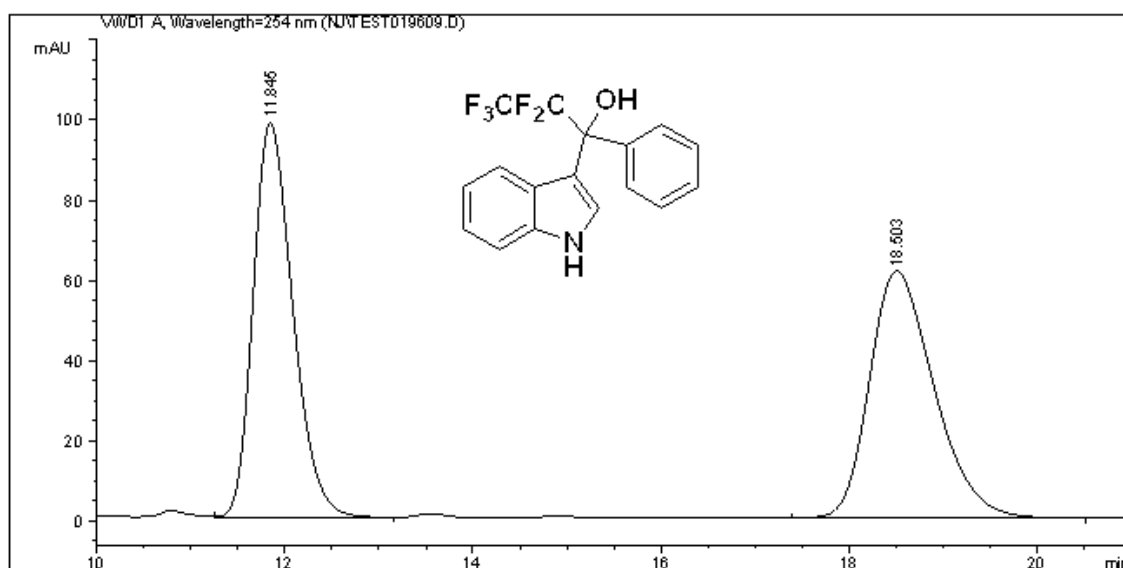

Signal 1: VWD1 A, Wavelength=254 nm

| Peak # | RetTime [min] | Type | Width [min] | Area mAU *s | Height [mAU] | Area %  |
|--------|---------------|------|-------------|-------------|--------------|---------|
| 1      | 11.845        | VV   | 0.4522      | 2879.89771  | 98.38171     | 49.4583 |
| 2      | 18.503        | BB   | 0.7374      | 2942.97998  | 61.66174     | 50.5417 |

Totals : 5822.87769 160.04345

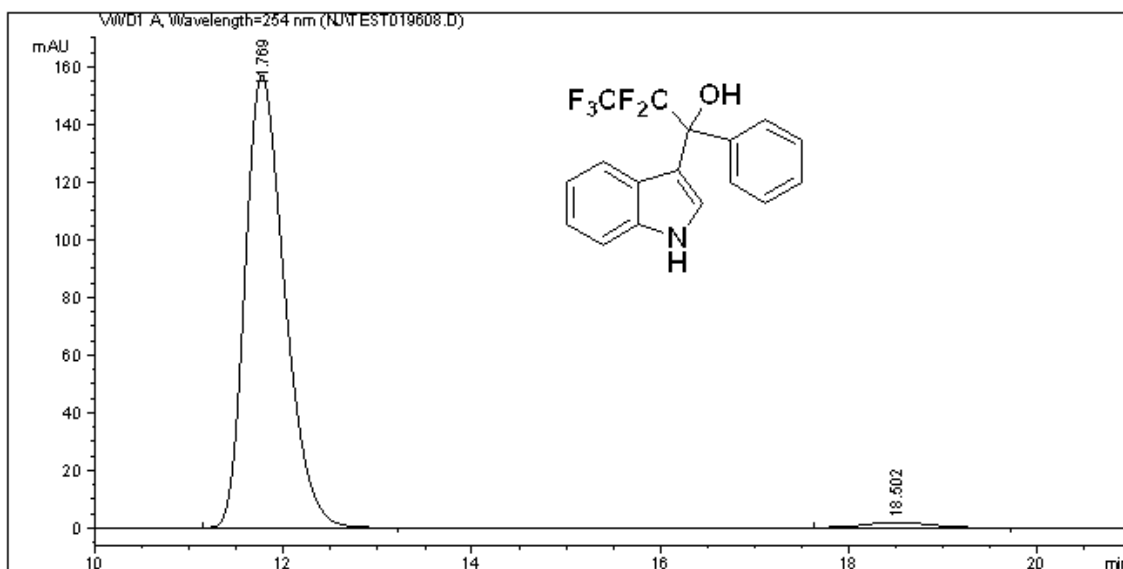

Signal 1: VWD1 A, Wavelength=254 nm

| Peak # | RetTime [min] | Type | Width [min] | Area mAU *s | Height [mAU] | Area %  |
|--------|---------------|------|-------------|-------------|--------------|---------|
| 1      | 11.769        | BB   | 0.4463      | 4559.21582  | 157.12010    | 98.0809 |
| 2      | 18.502        | BB   | 0.6862      | 89.20952    | 1.93583      | 1.9191  |

Totals : 4648.42534 159.05593
